# Supplementary material for: Synthesis and antitumor activity of inositol phosphotriester analogues
Source: Royal Society of Chemistry journal article supplement (doi:10.1039/c2ob00031h), 2012-01-01

# Supporting Information

## Synthesis and Antitumor Activity of Inositol Phosphotriester Analogues

Fanbo Song,<sup>a</sup> Jing Zhang,<sup>b</sup> Yuefang Zhao,<sup>a</sup> Wenbin Chen,<sup>a</sup> Luyuan Li,<sup>b</sup> and Zhen Xi\*<sup>a</sup>

### Didecyl N,N-diisopropylphosphoramidite (8)

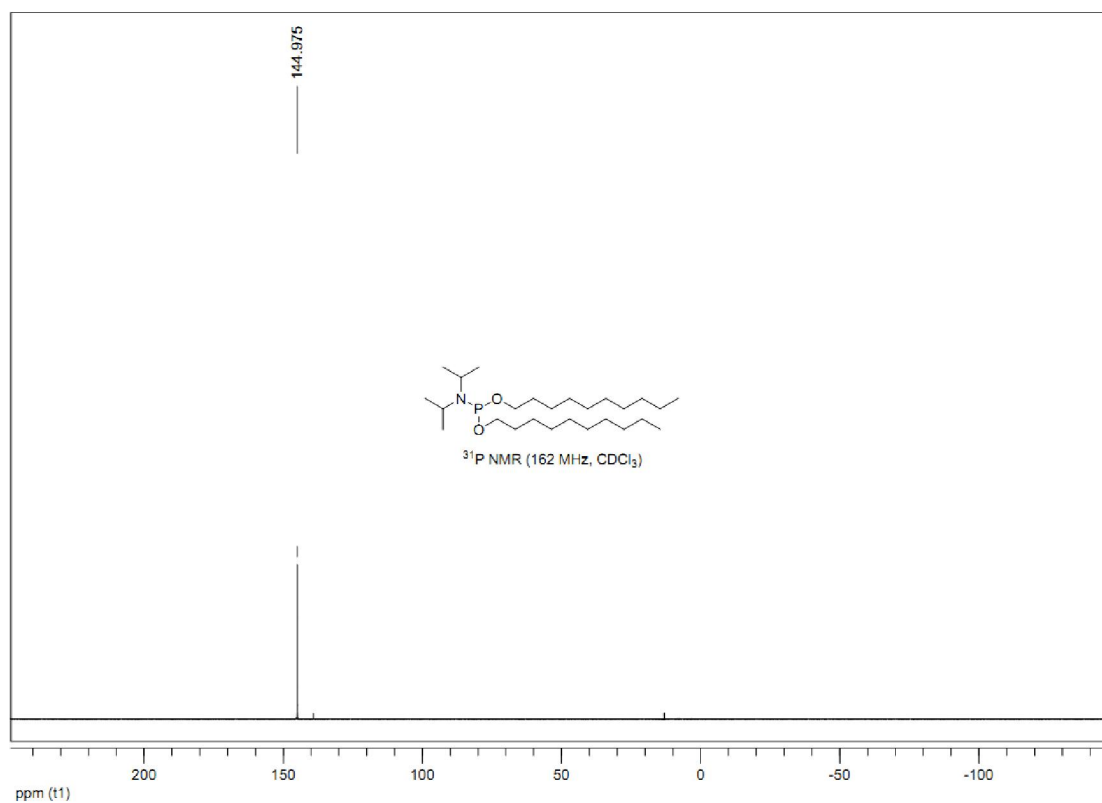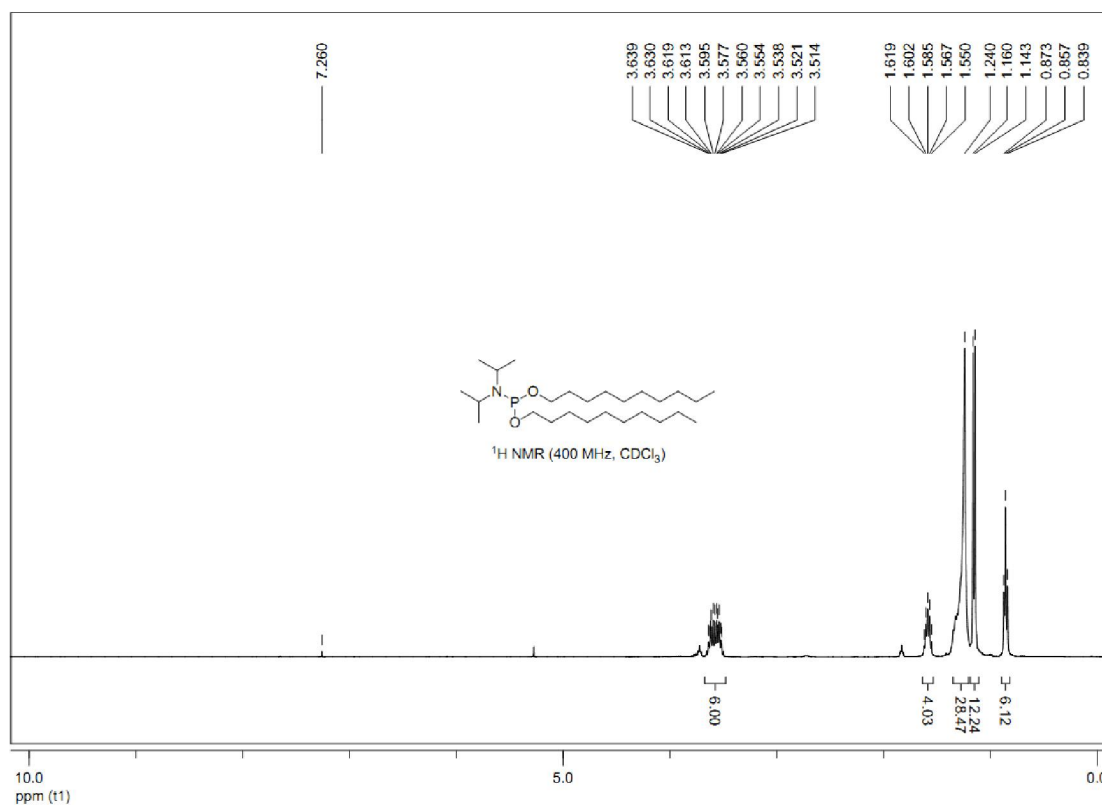

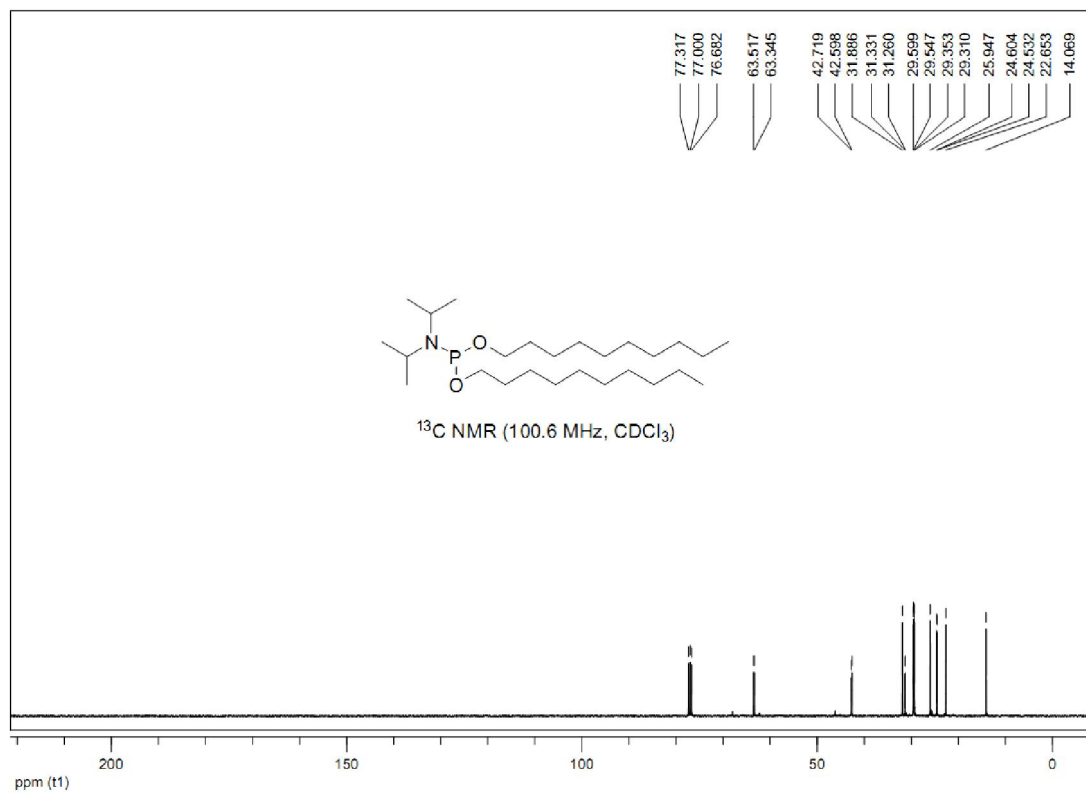

**(±)-2,4,6-tri-O-benzyl-3,5-O-ethylidene-D-myoinositol-1-(didecyl phosphate) (9)**

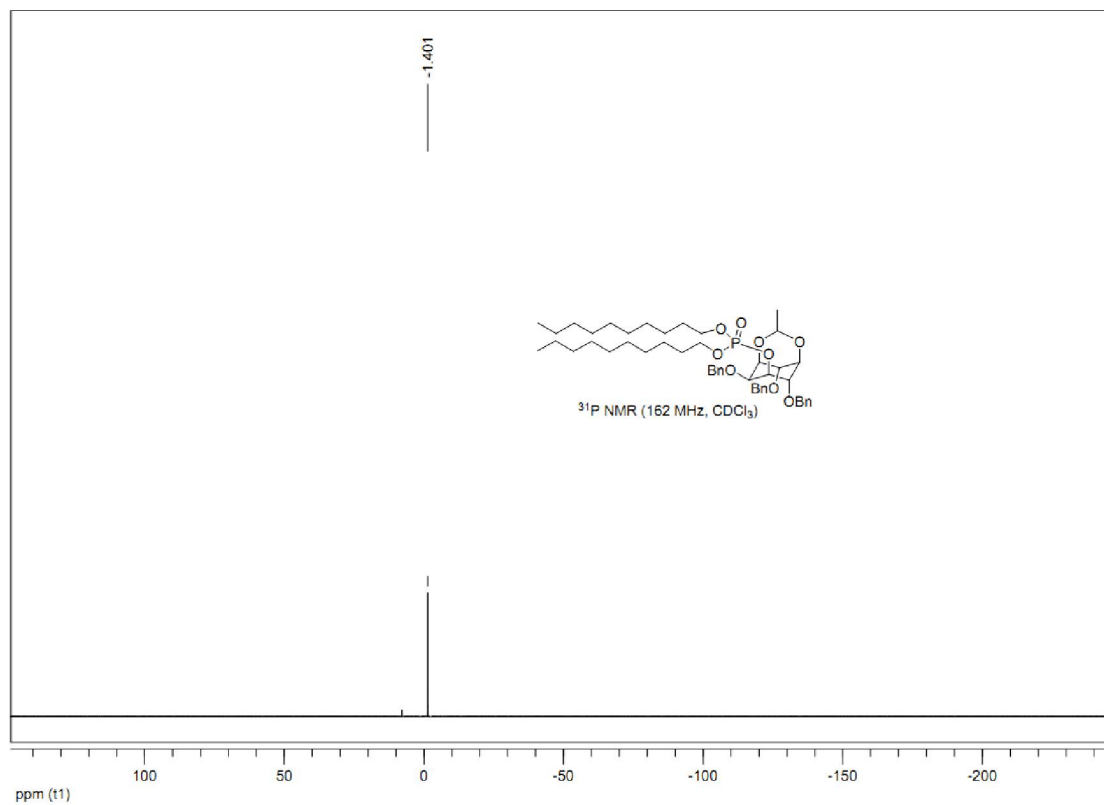

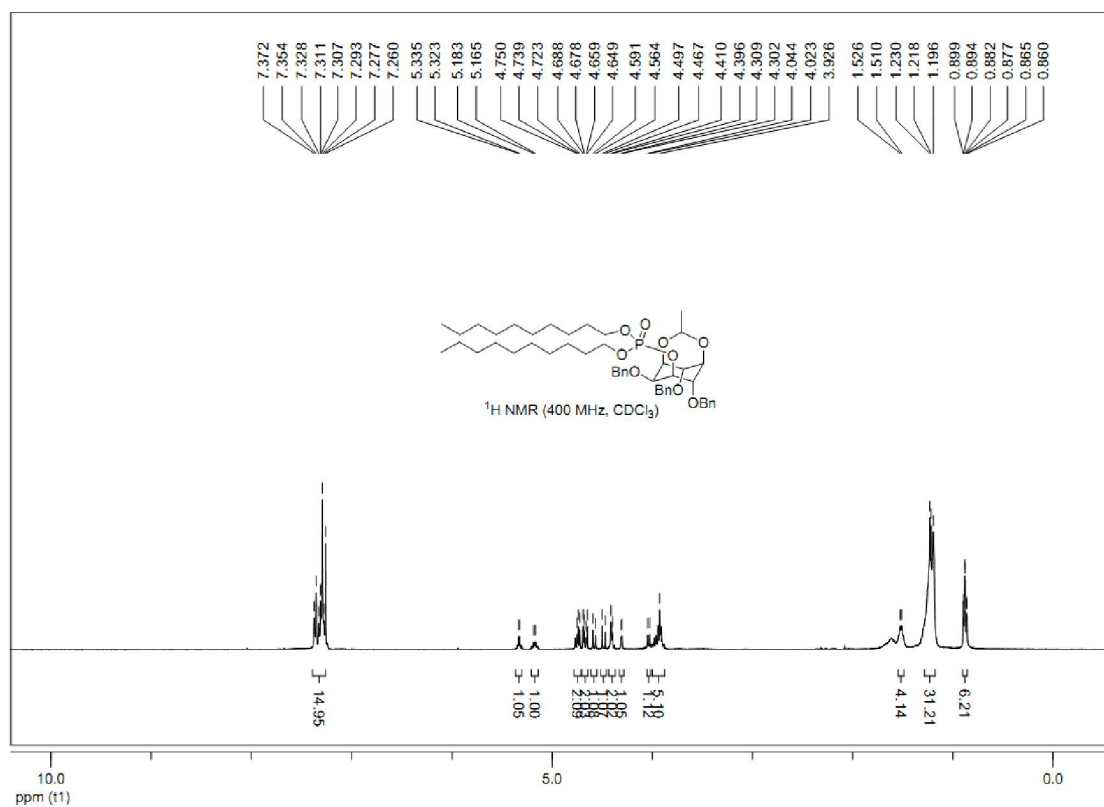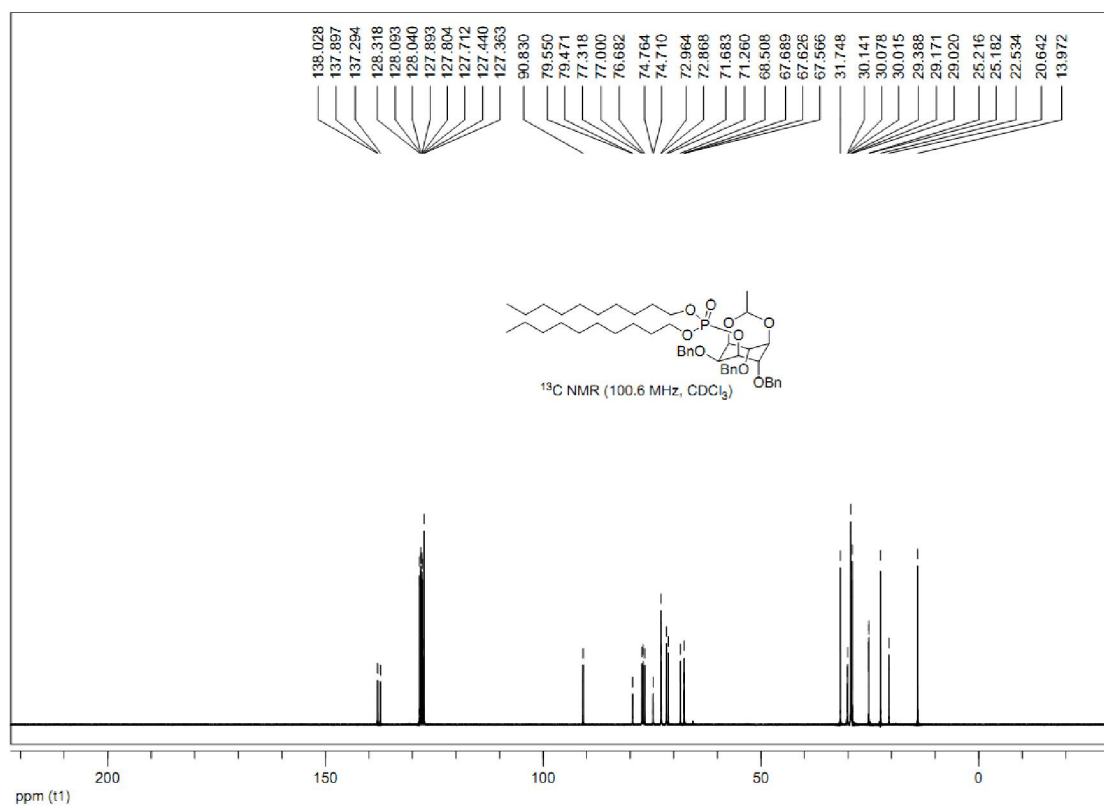

(±)-2,4,6-tri-O-benzyl-D-myoinositol-1-(didecyl phosphate) (10)

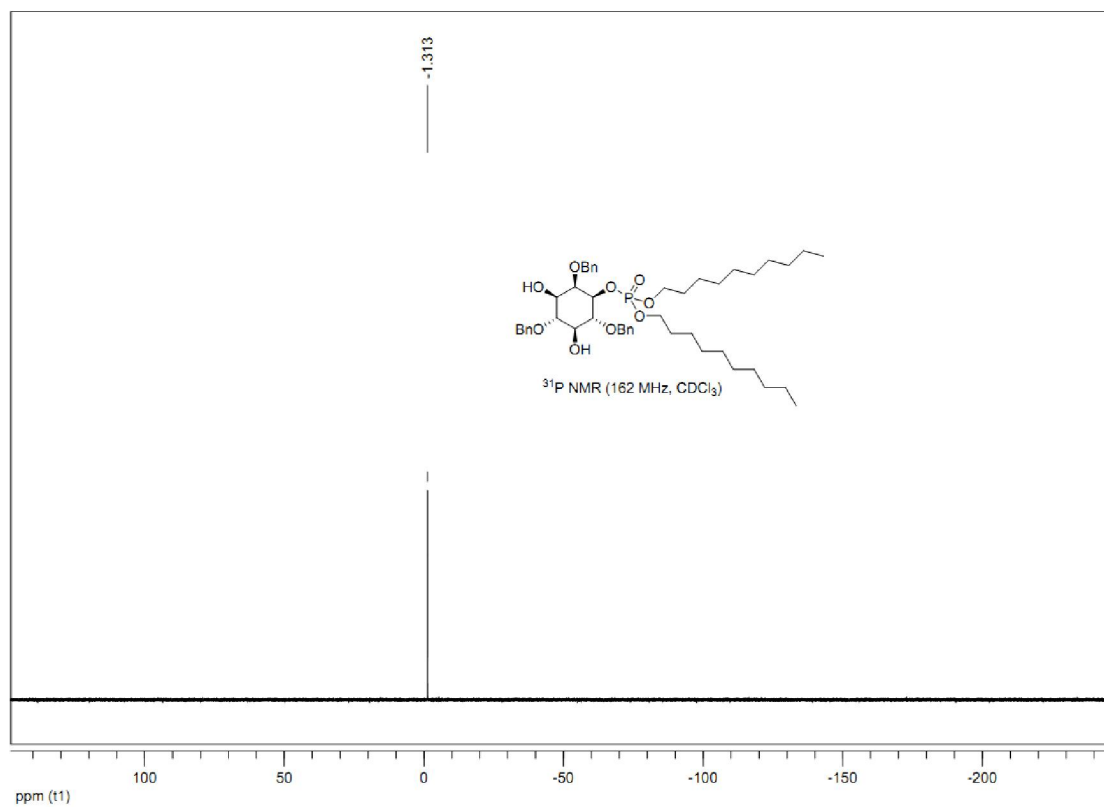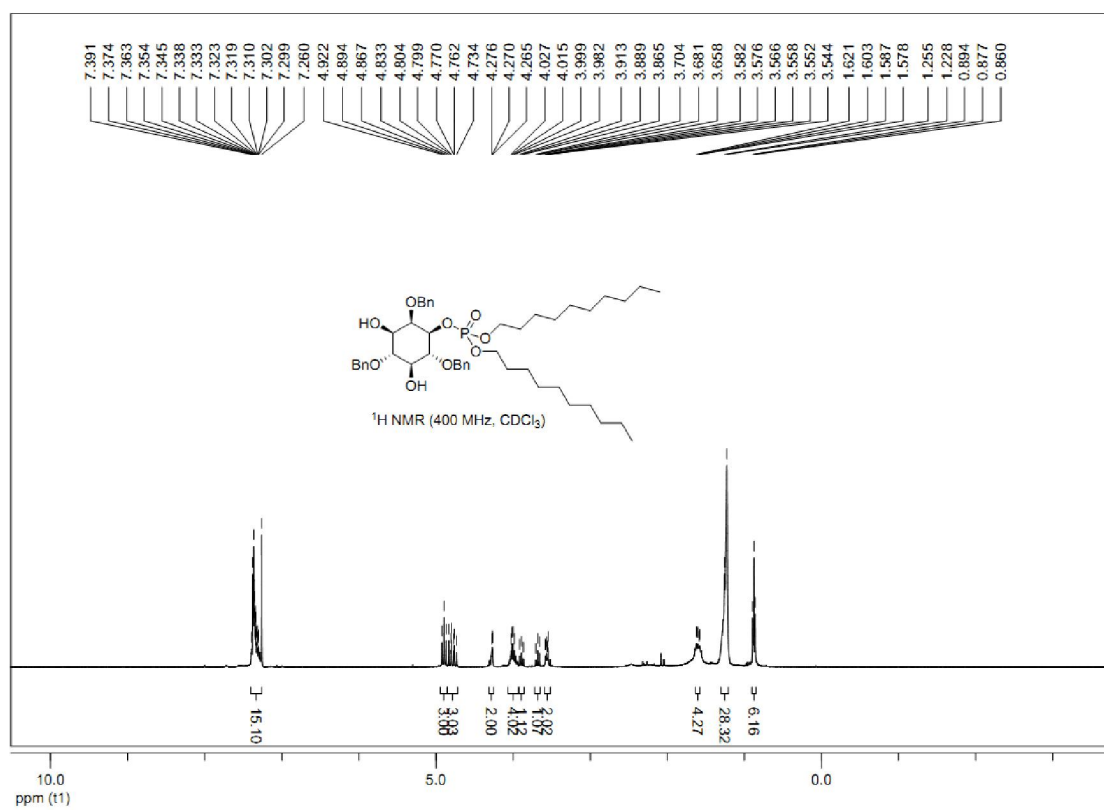

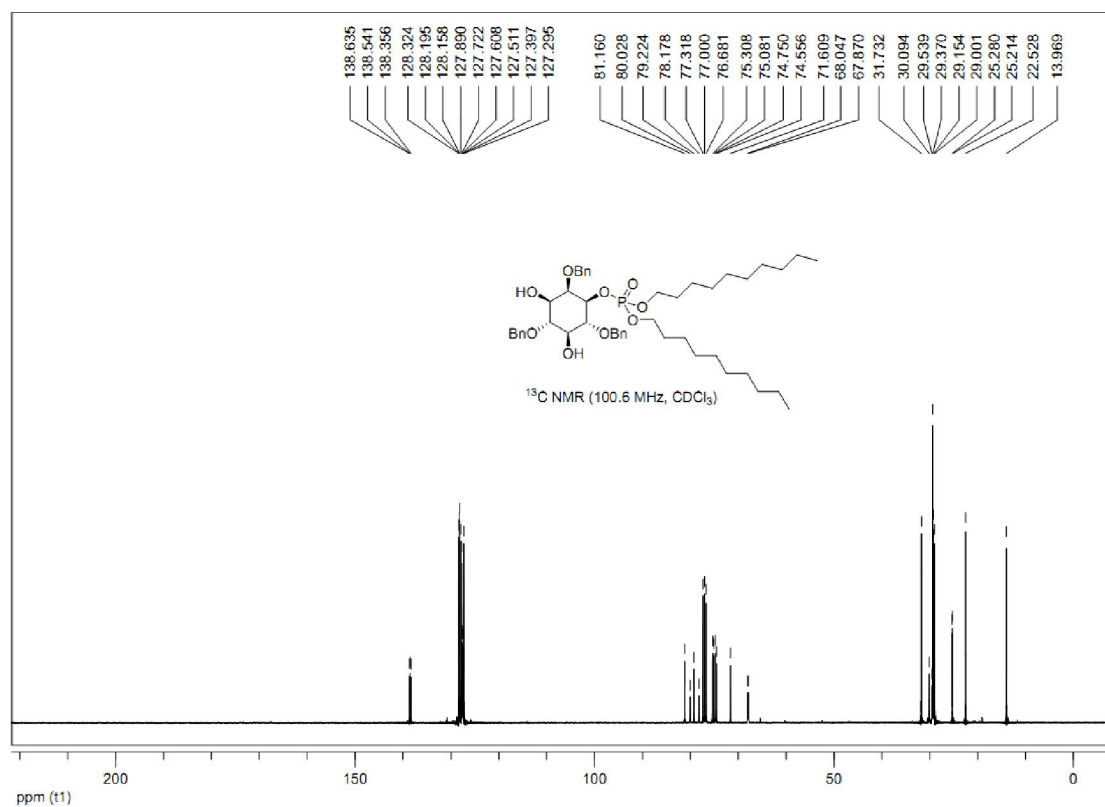

(±)-D-myoinositol-1-(didecyl phosphate) (11)

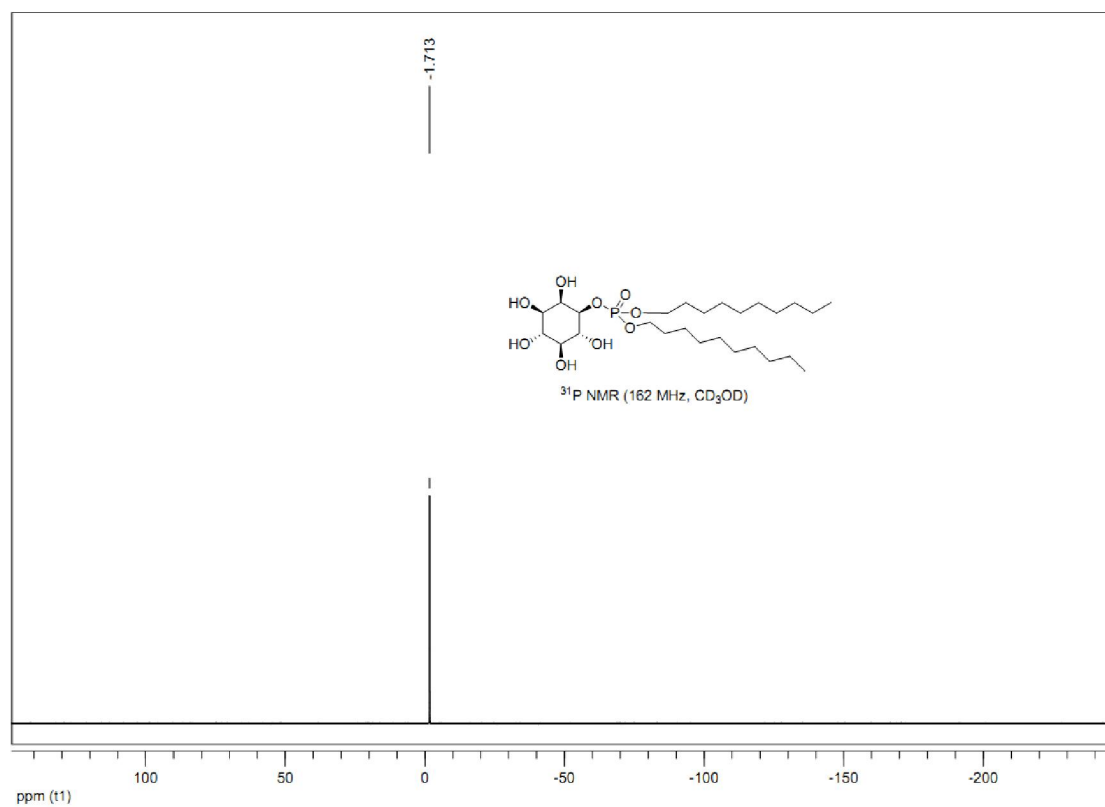

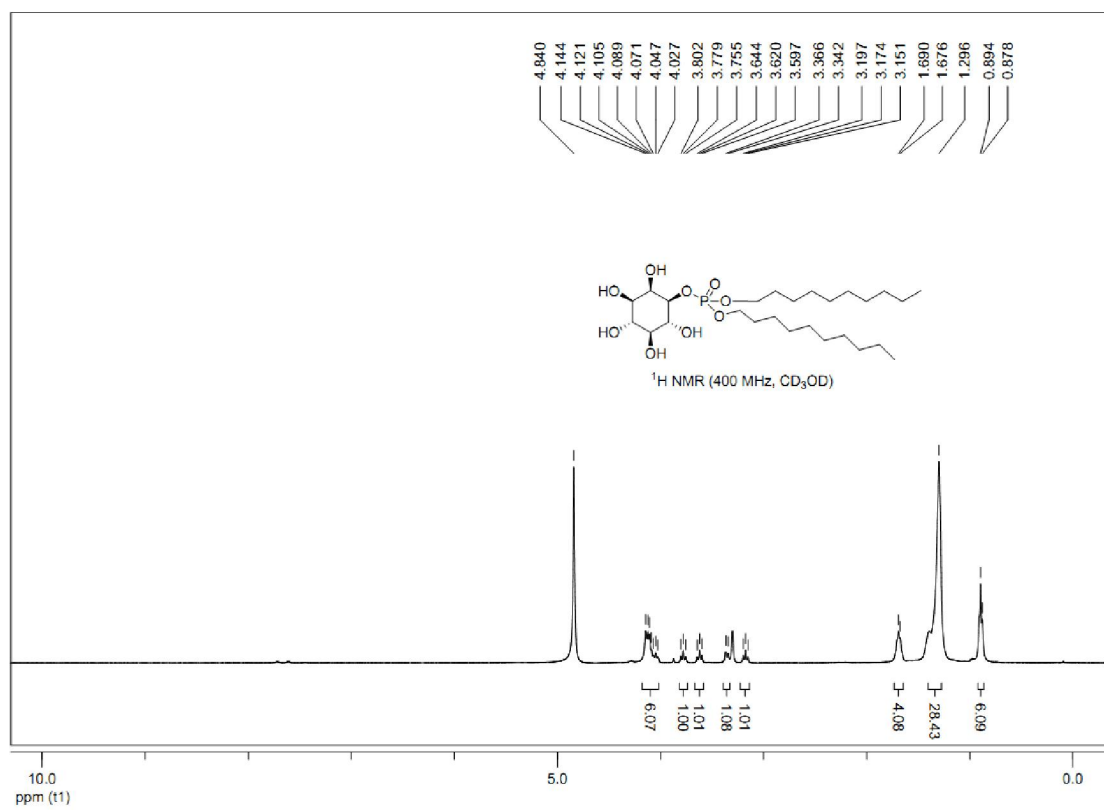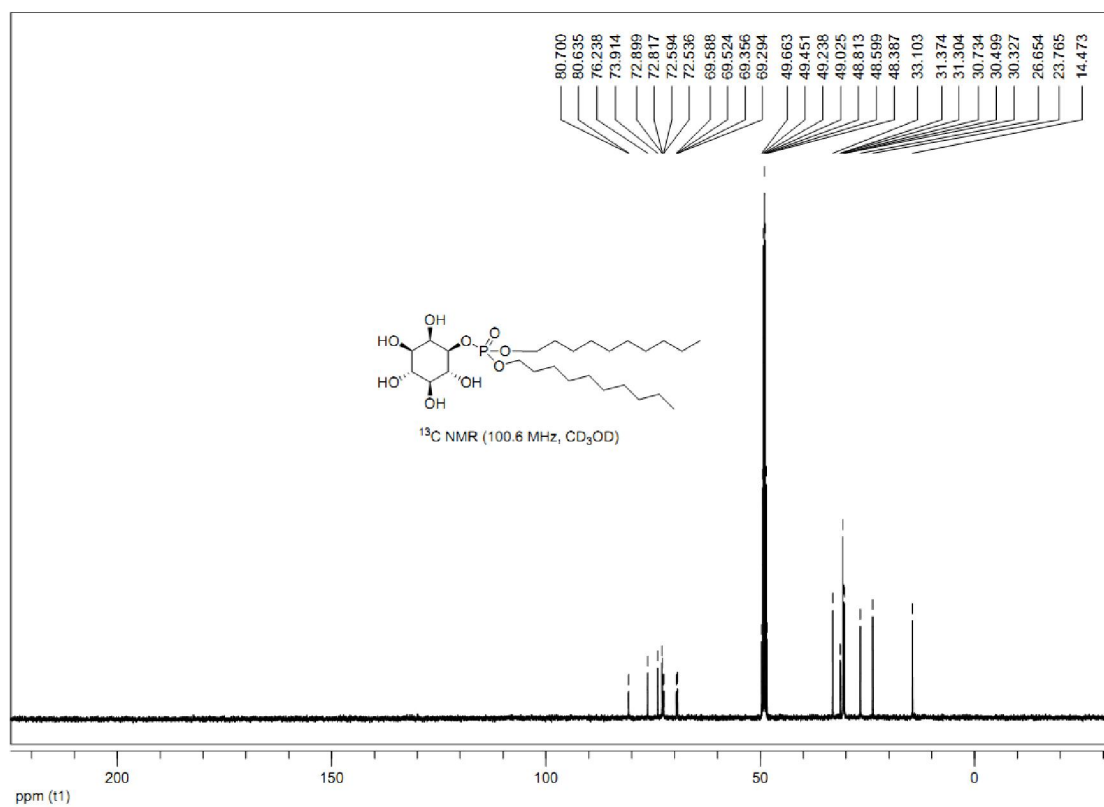

(±)-2,3,4,5,6-penta-O-butyryl-D-*myo*-inositol-1-(didecyl phosphate) (12)

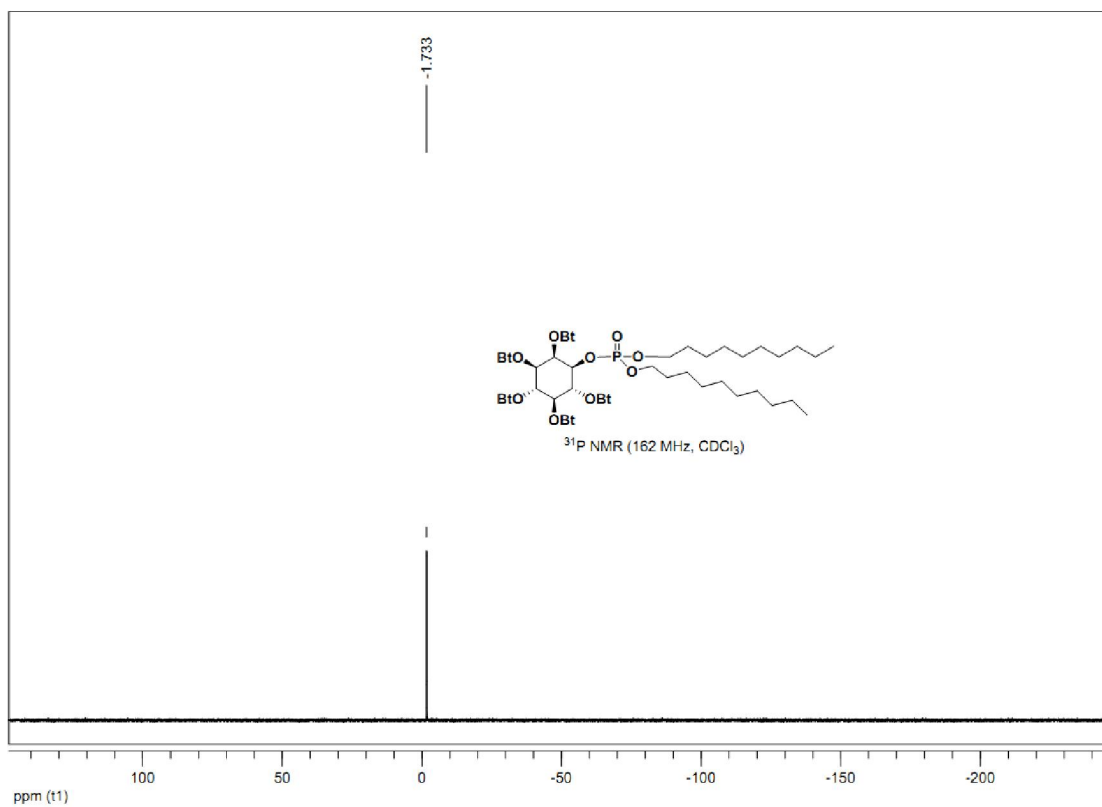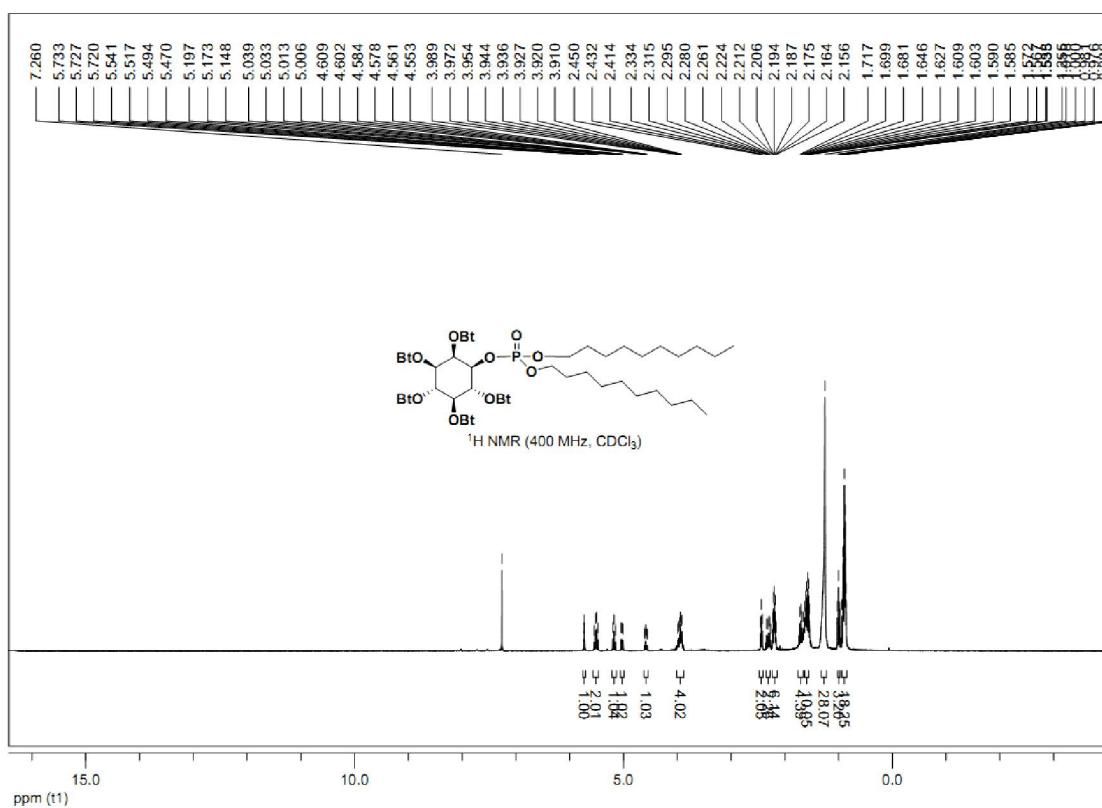



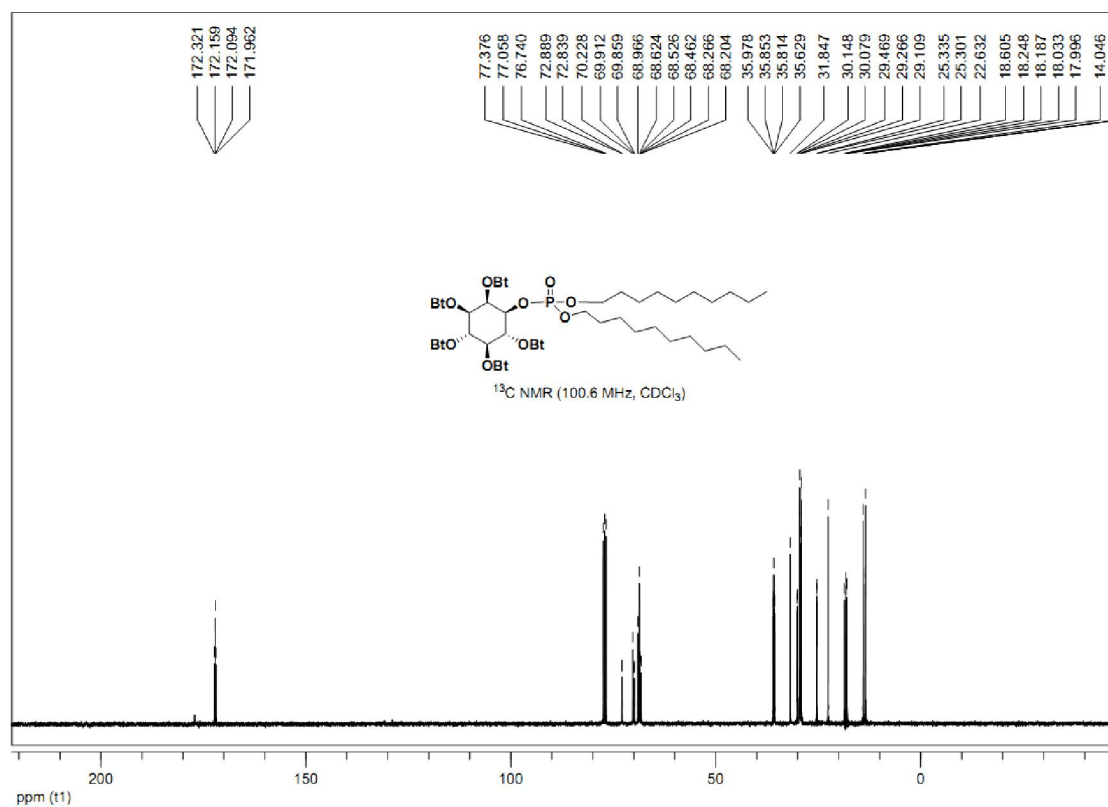

**meso-4,6-di-O-benzyl-1,3,5-O-orthoformate-D-myo-inositol-2-(didecyl phosphate) (13)**

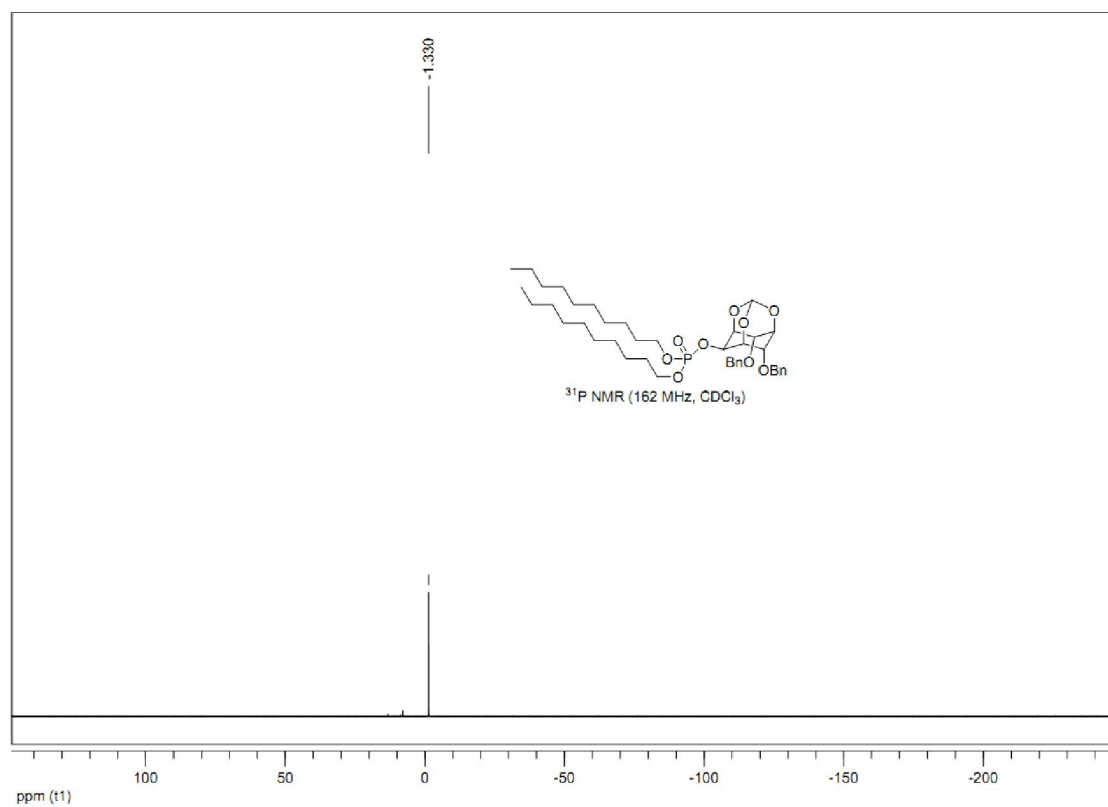

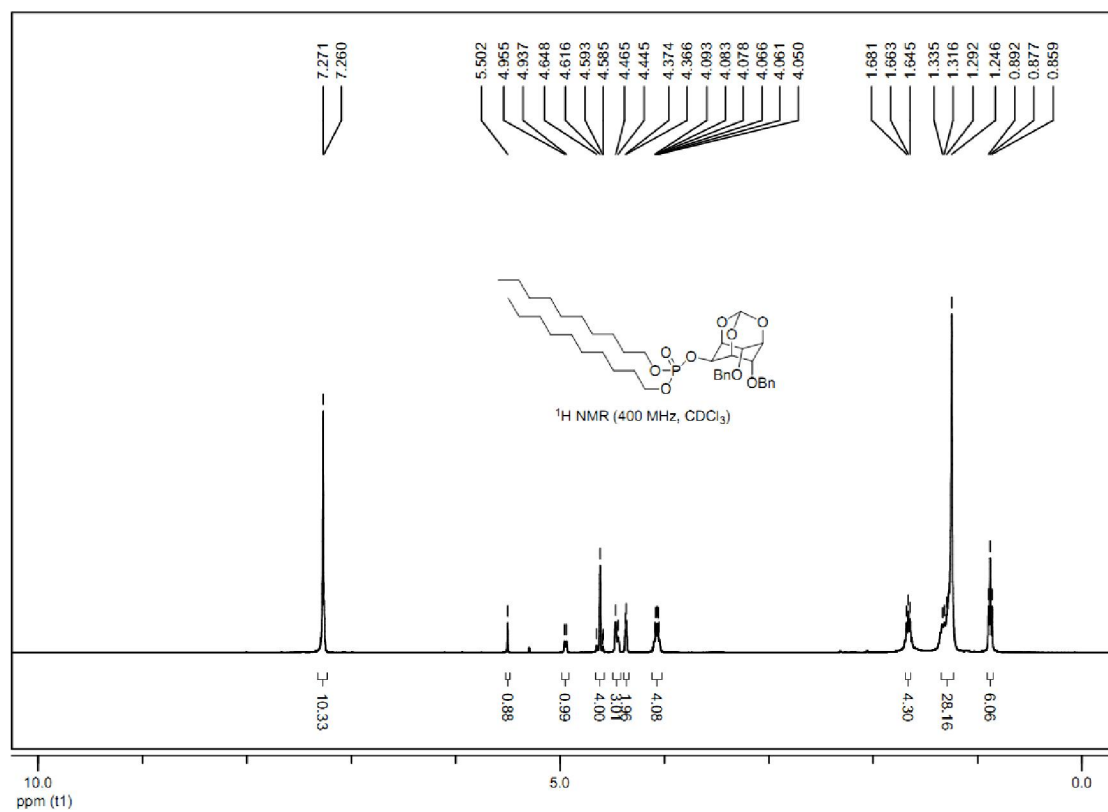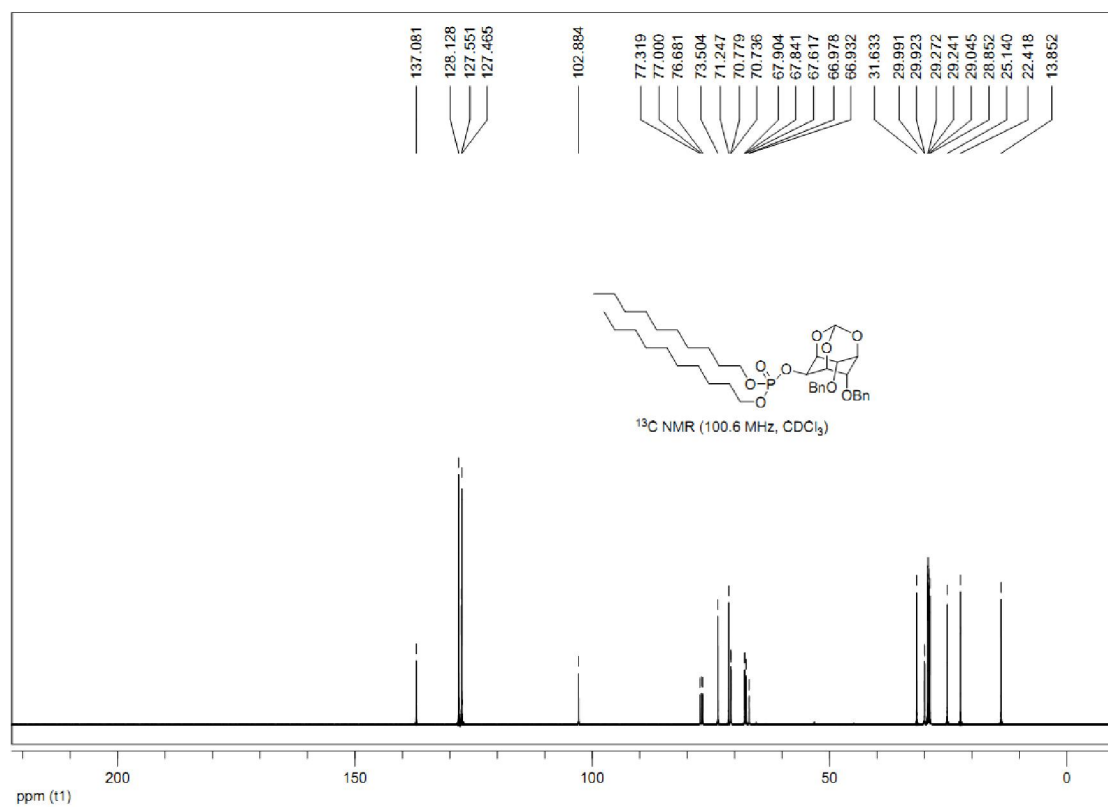

**meso-4,6-di-O-benzyl-D-myo-inositol-2-(didecyl phosphate) (14)**

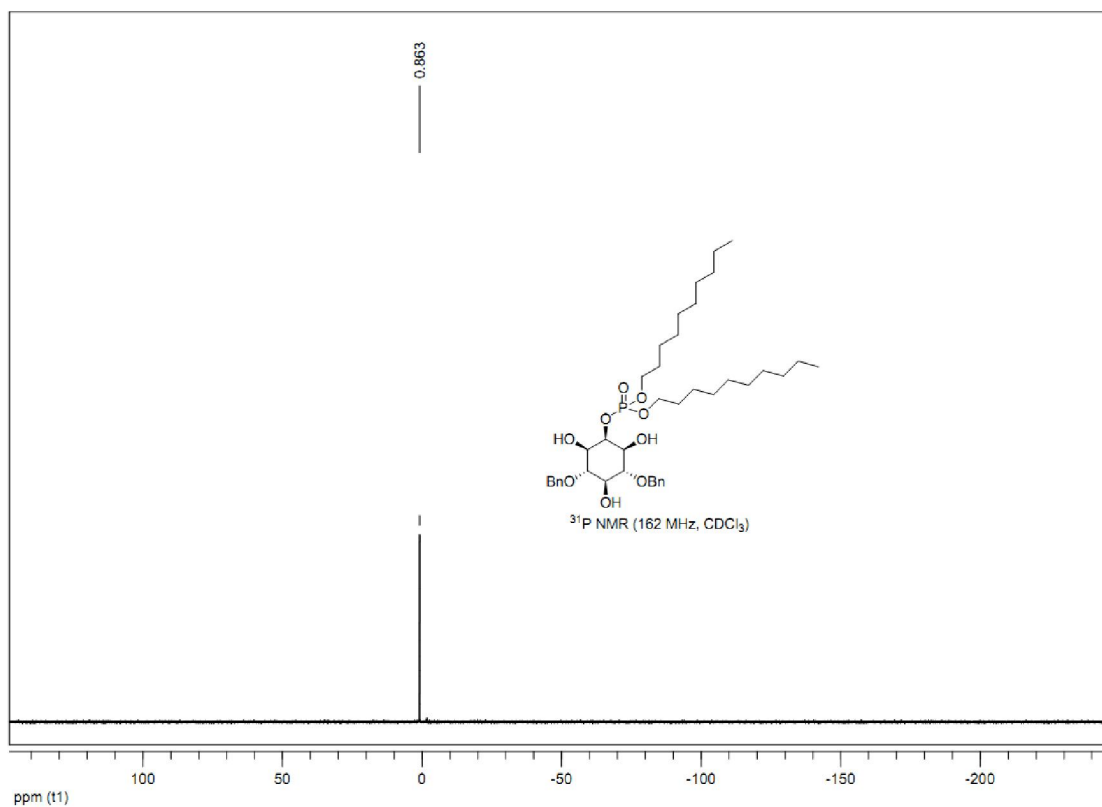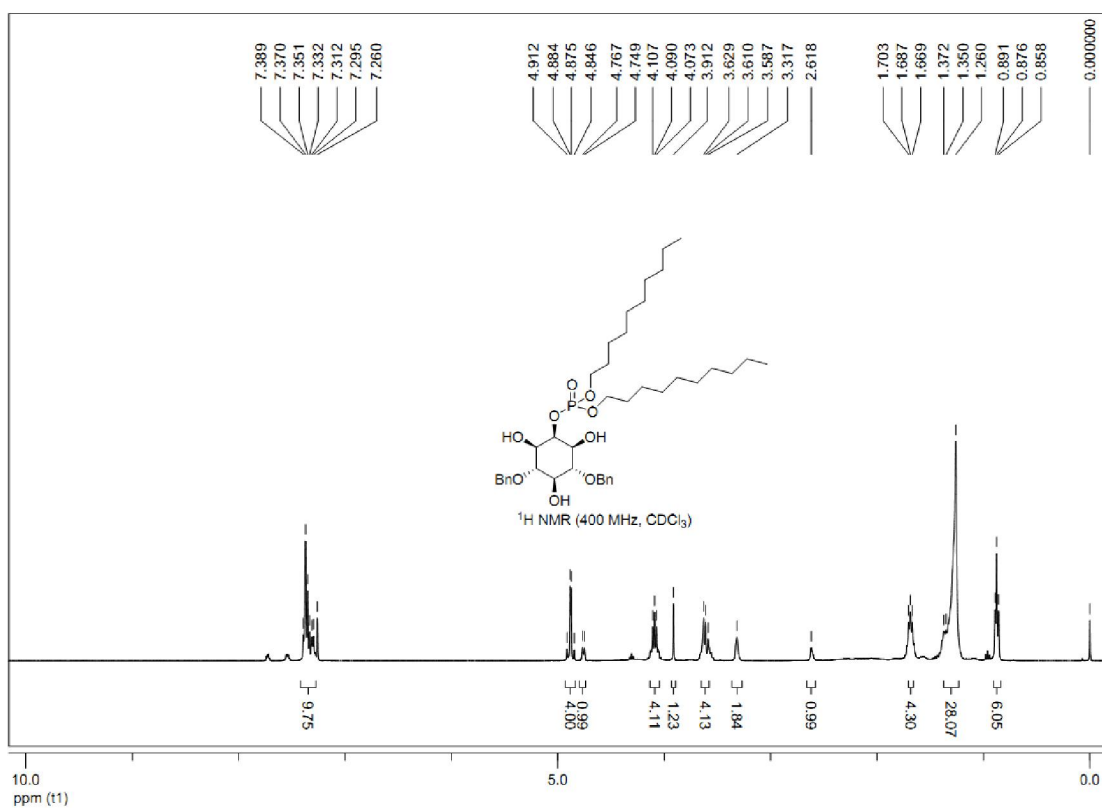

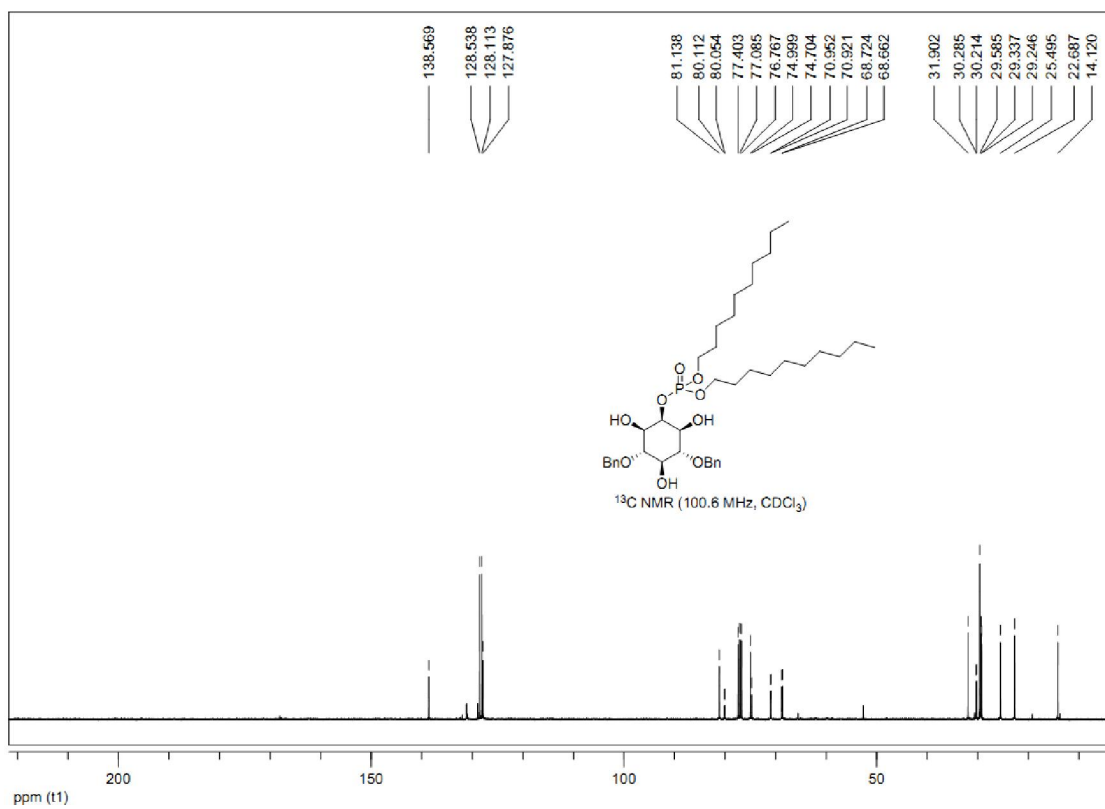

**meso-D-myoinositol-2-(didecyl phosphate) (15)**

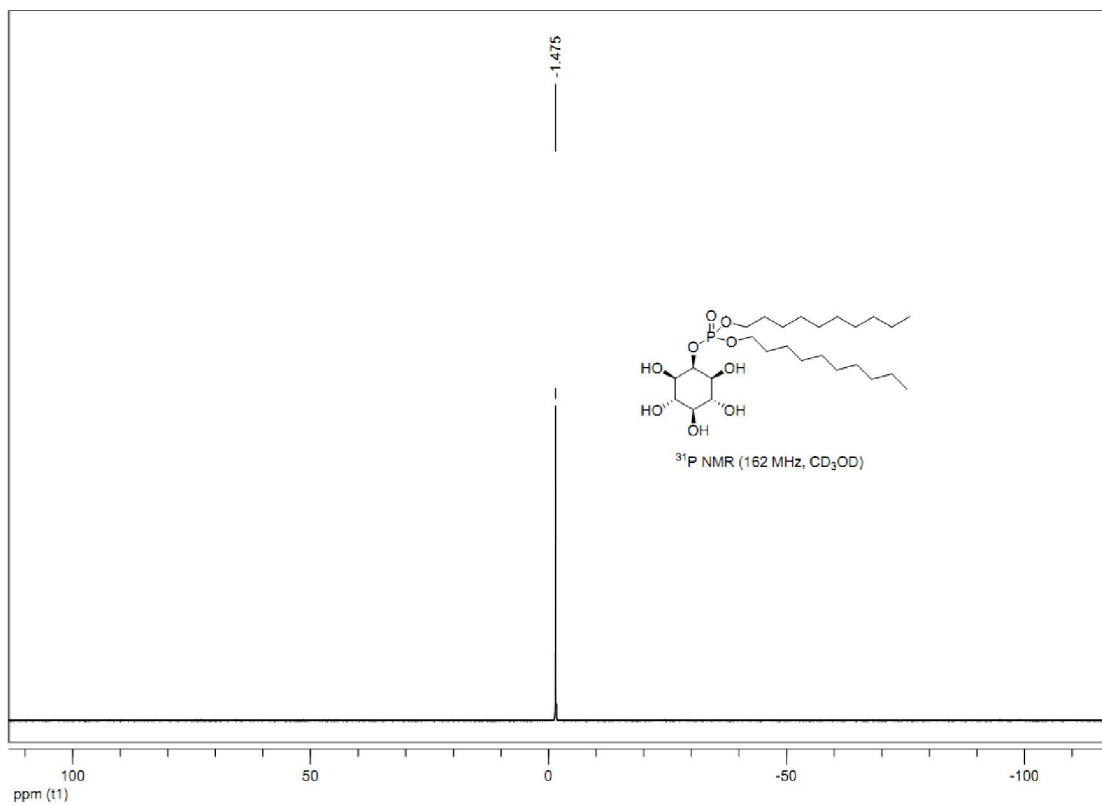

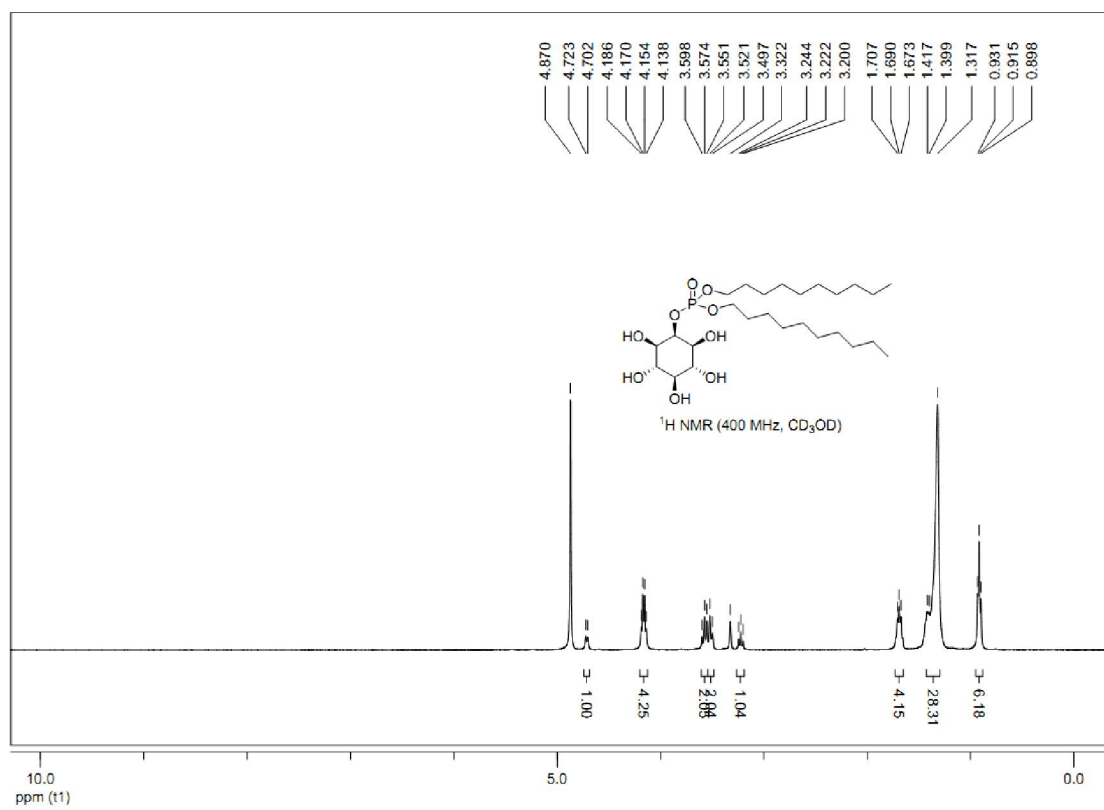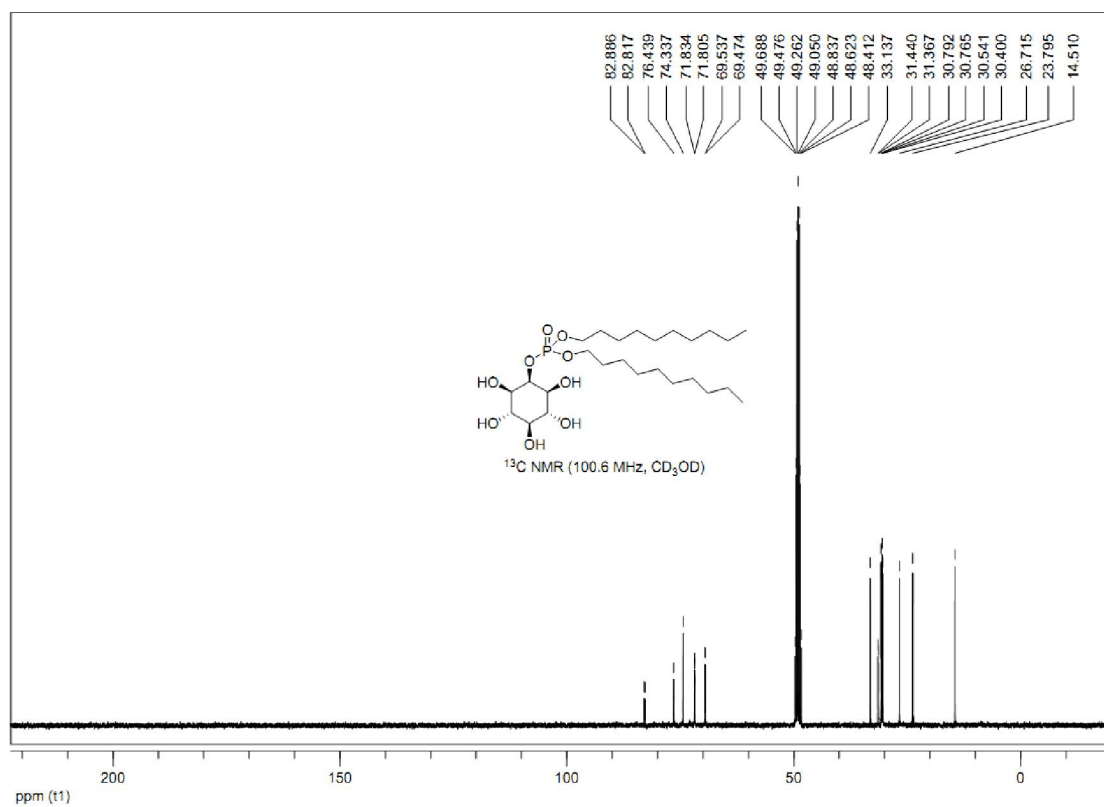

(±)-4-O-benzyl-1,3,5-O-orthoformate-D-*myo*-inositol-2-(didecyl phosphate) (16)

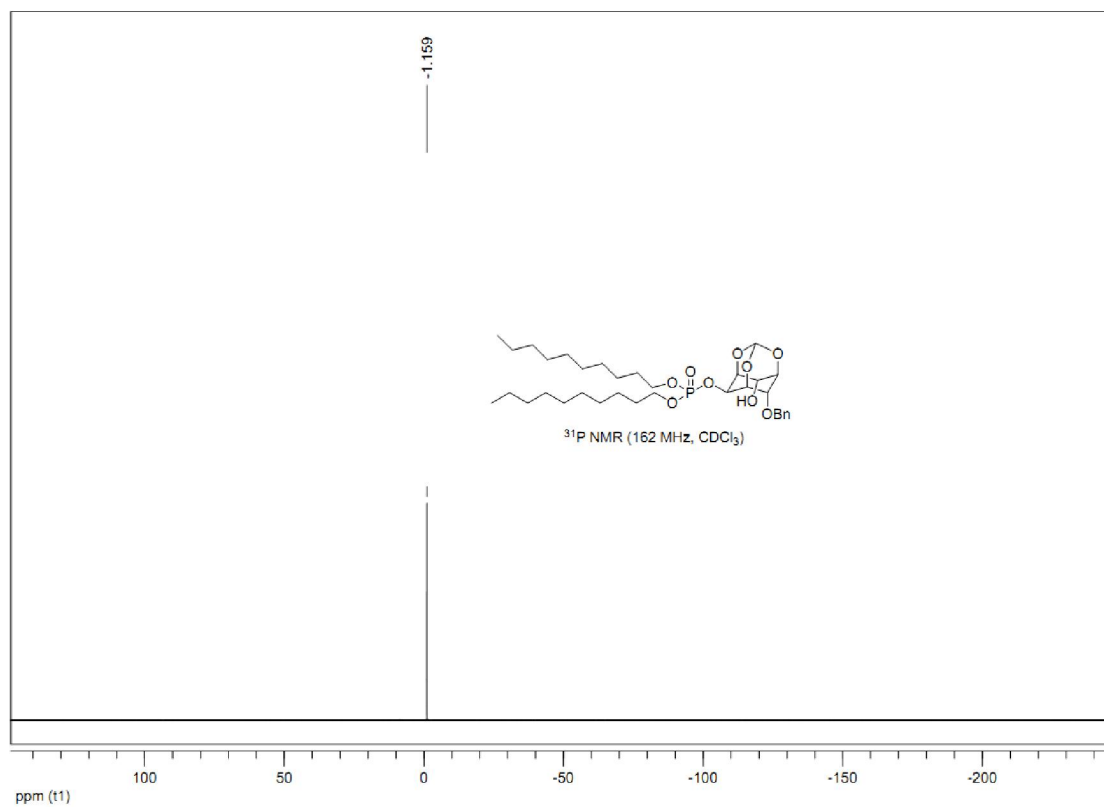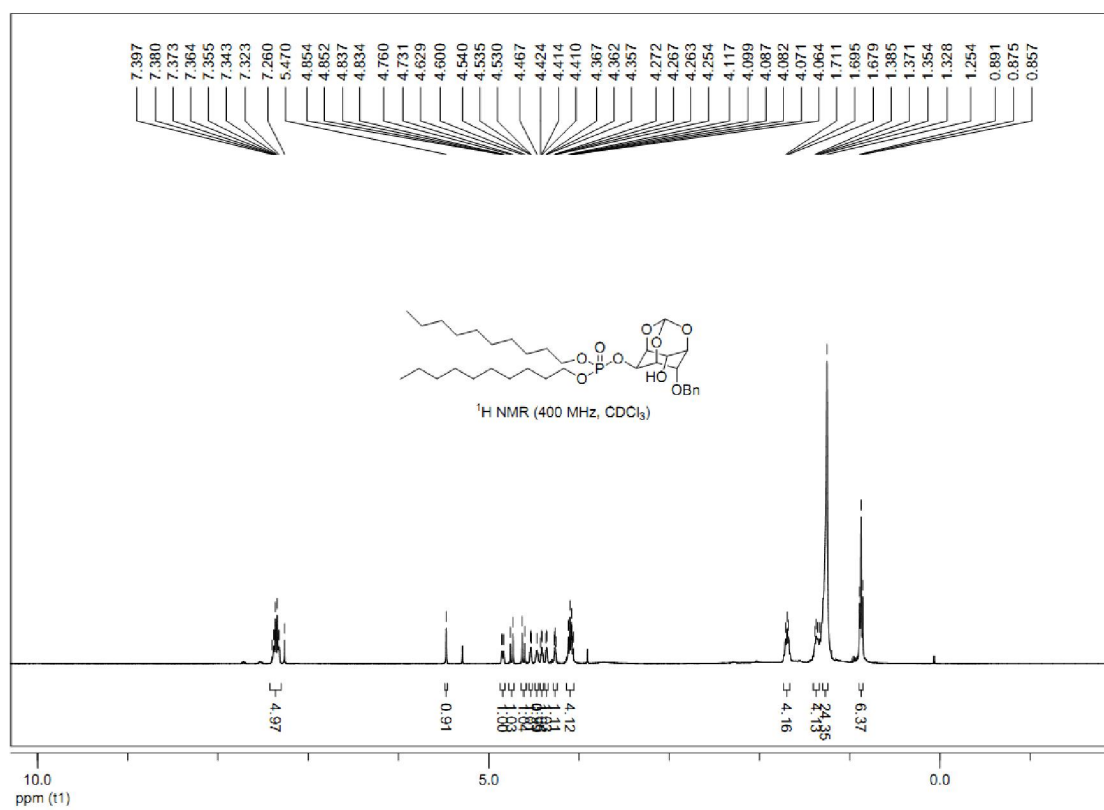

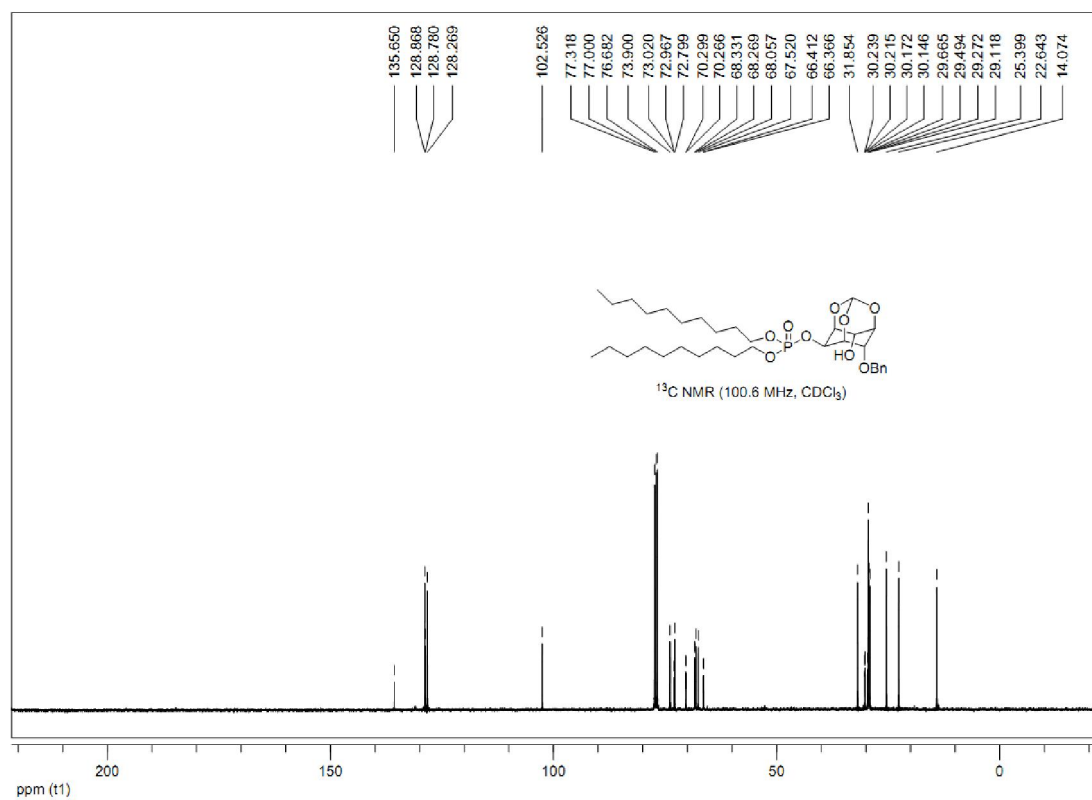

**meso-1,3,5-O-orthoformate-D-myo-inositol-2-(didecyl phosphate) (17)**

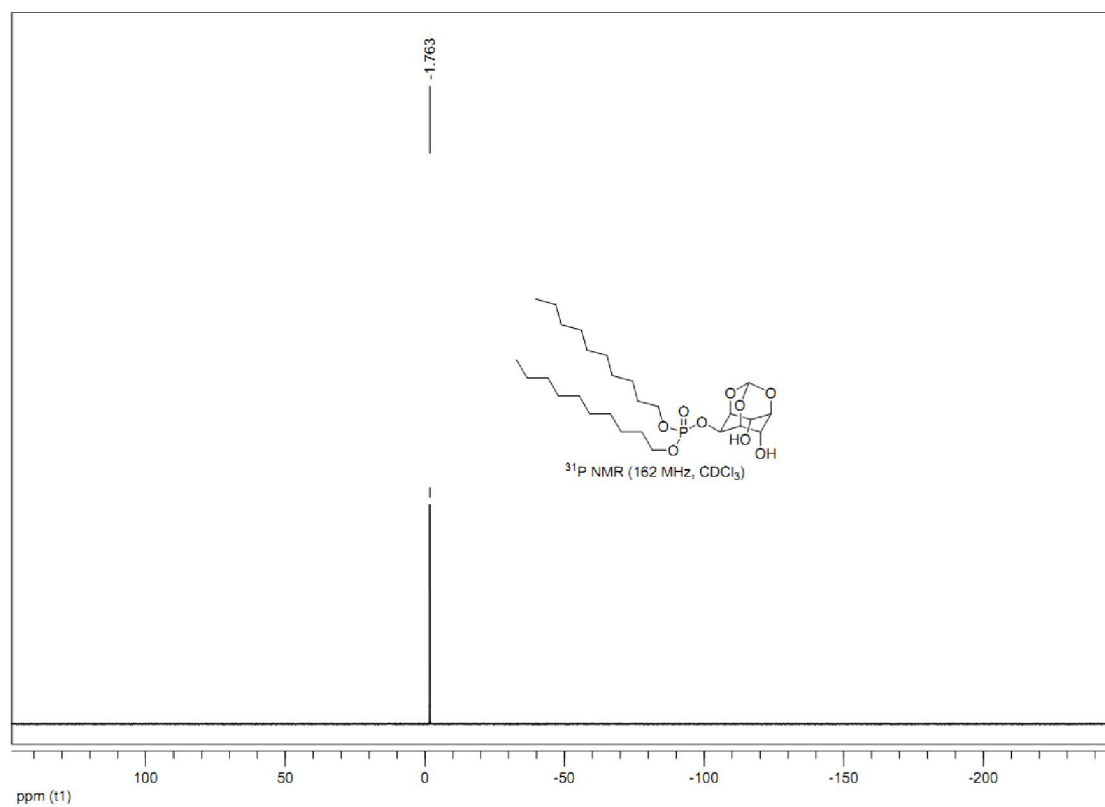

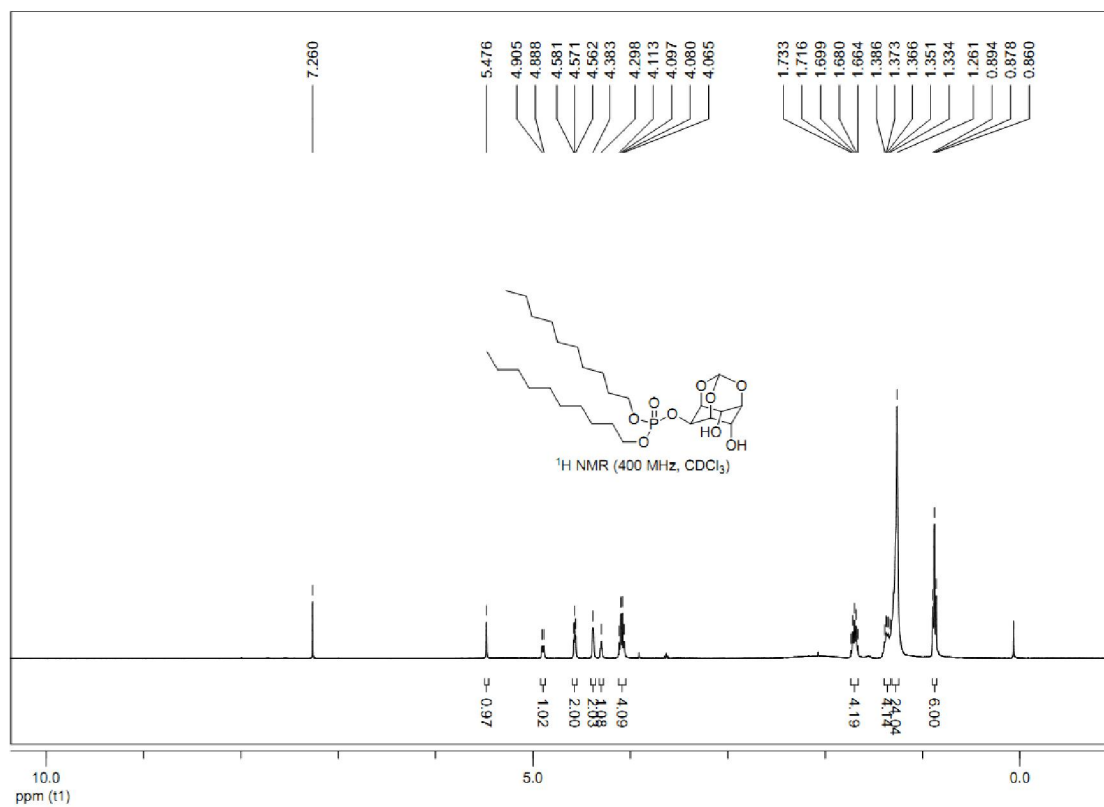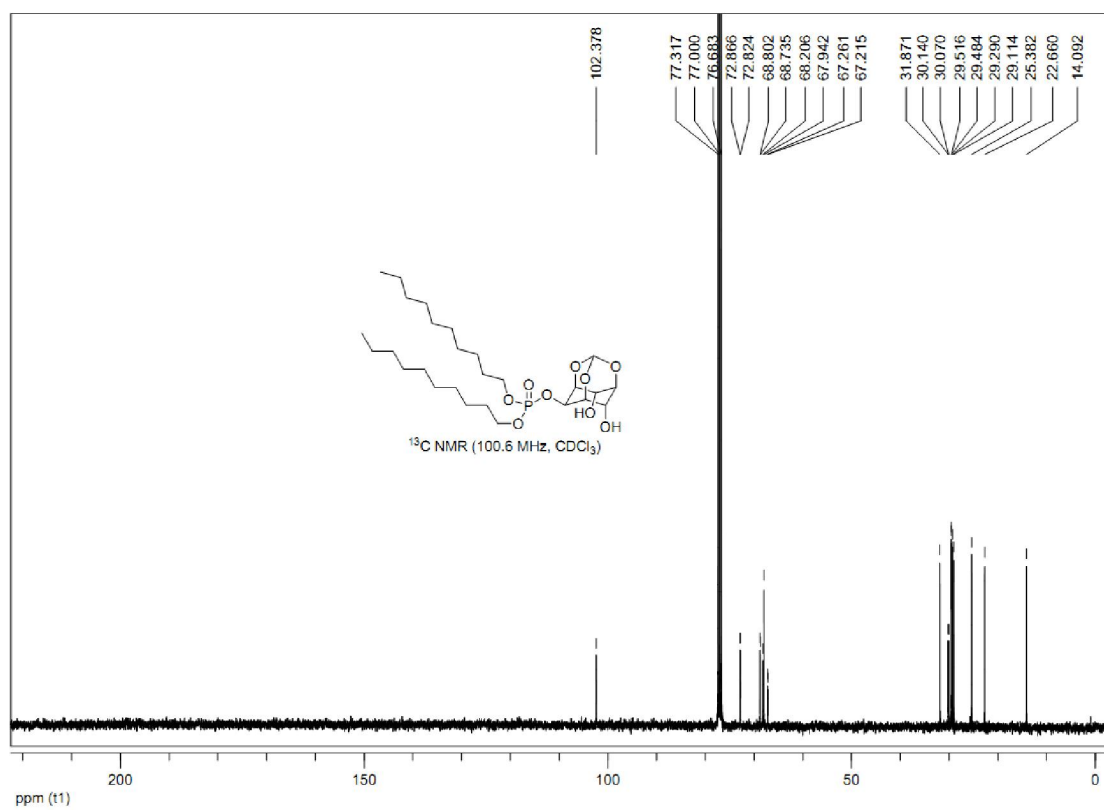



(±)-2-O-*tert*-butyldimethylsilyl-6-O-benzyl-D-*myo*-inositol-1,3,5-O-orthoformate-4-(didecyl phosphate) (18)

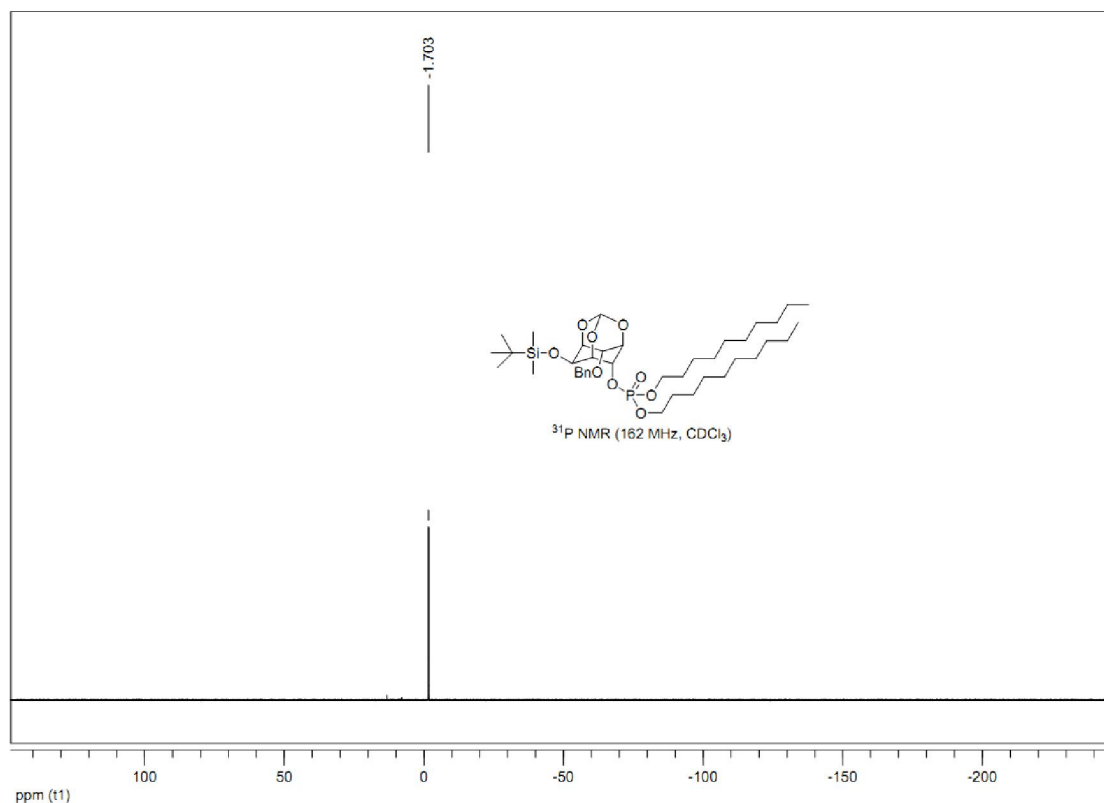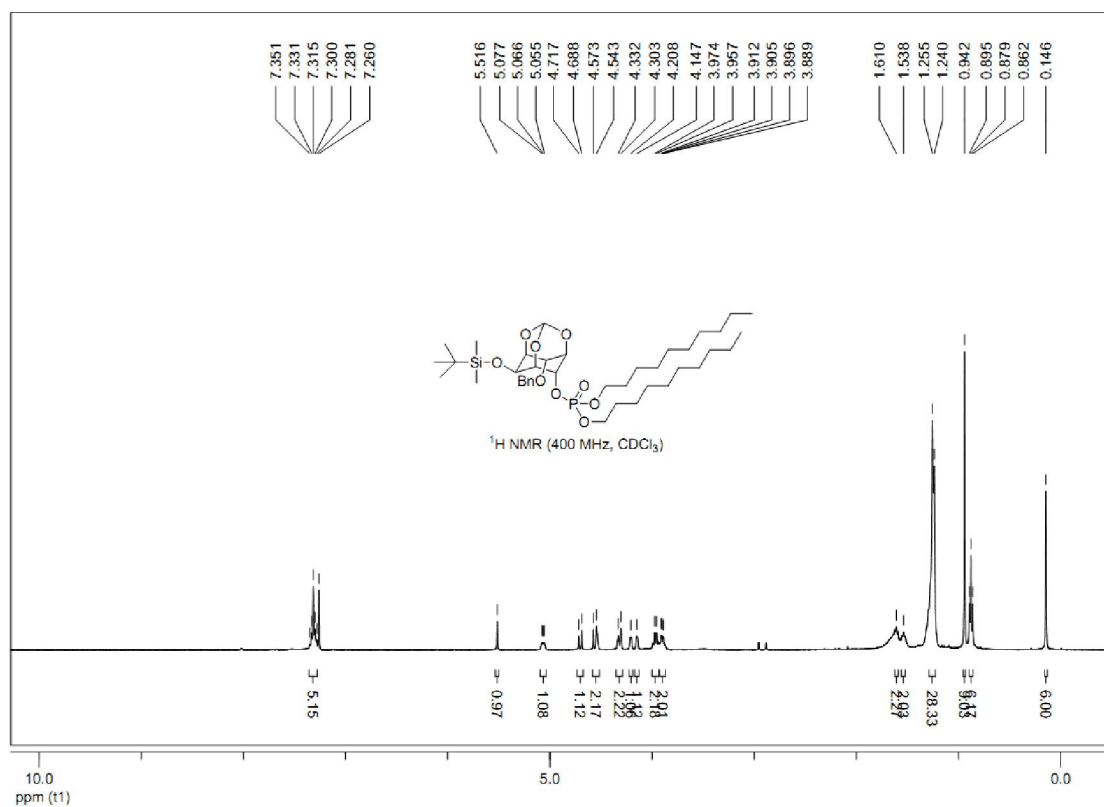

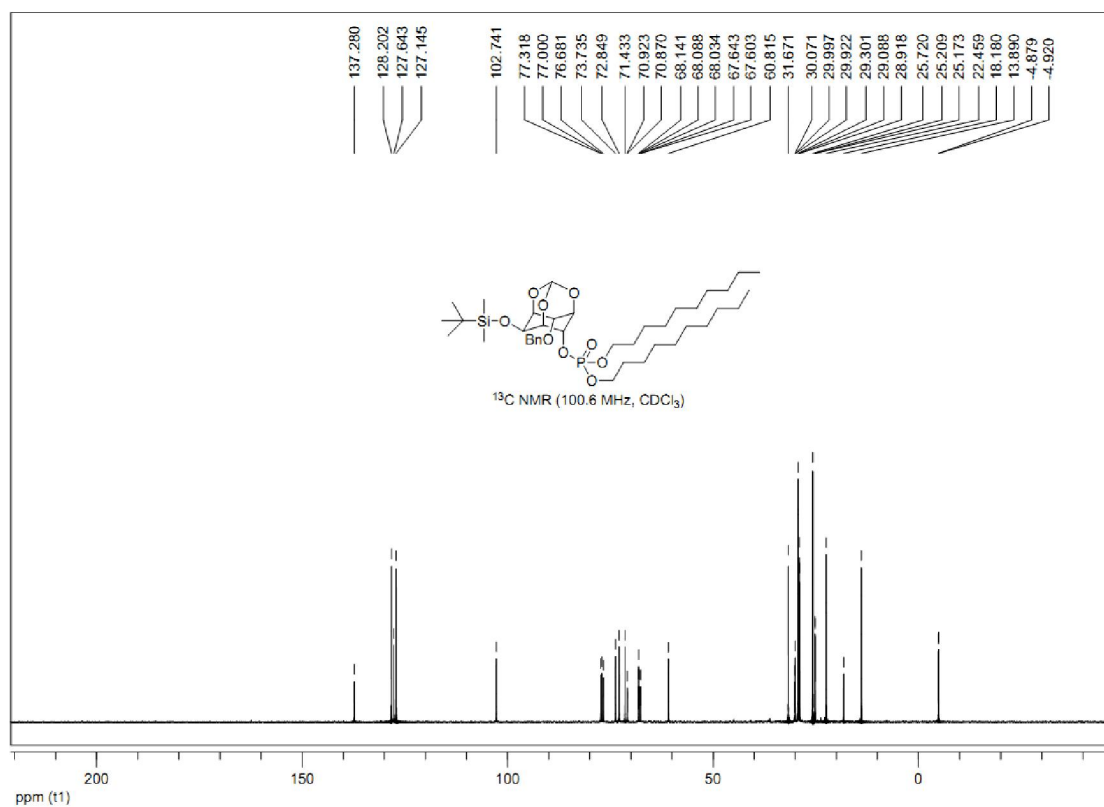

**(±)-6-O-benzyl-D-*myo*-inositol-4-(didecyl phosphate) (19)**

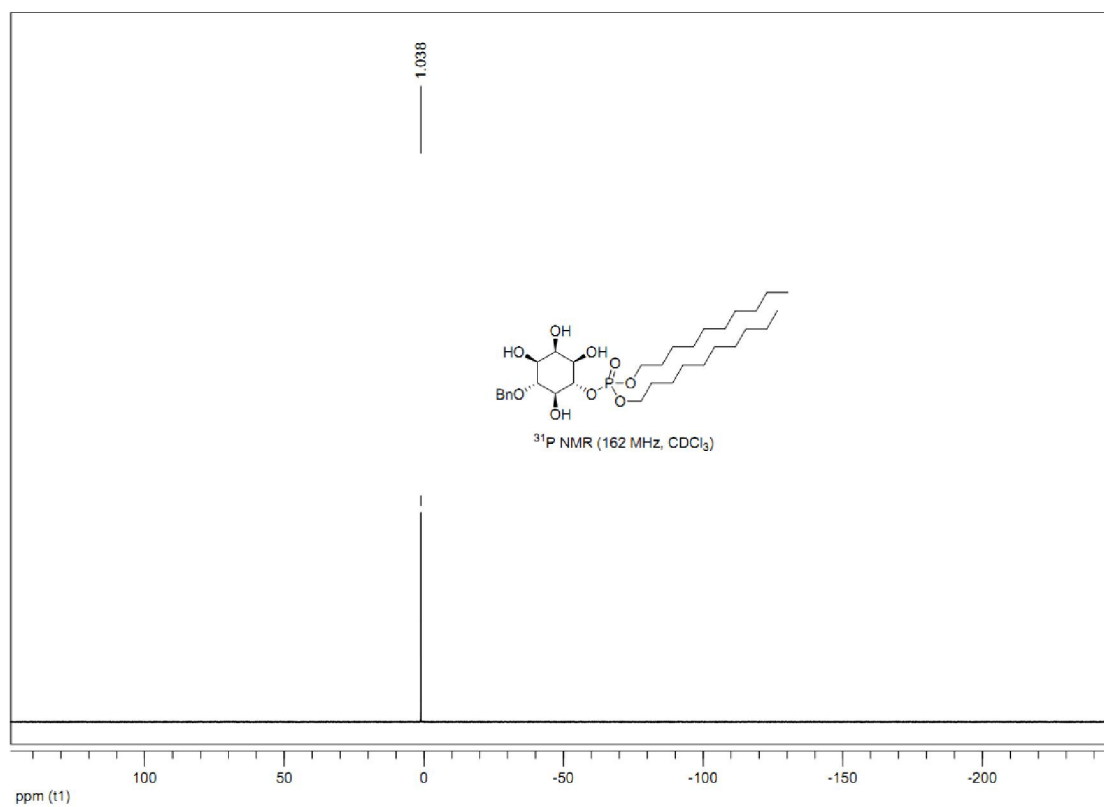

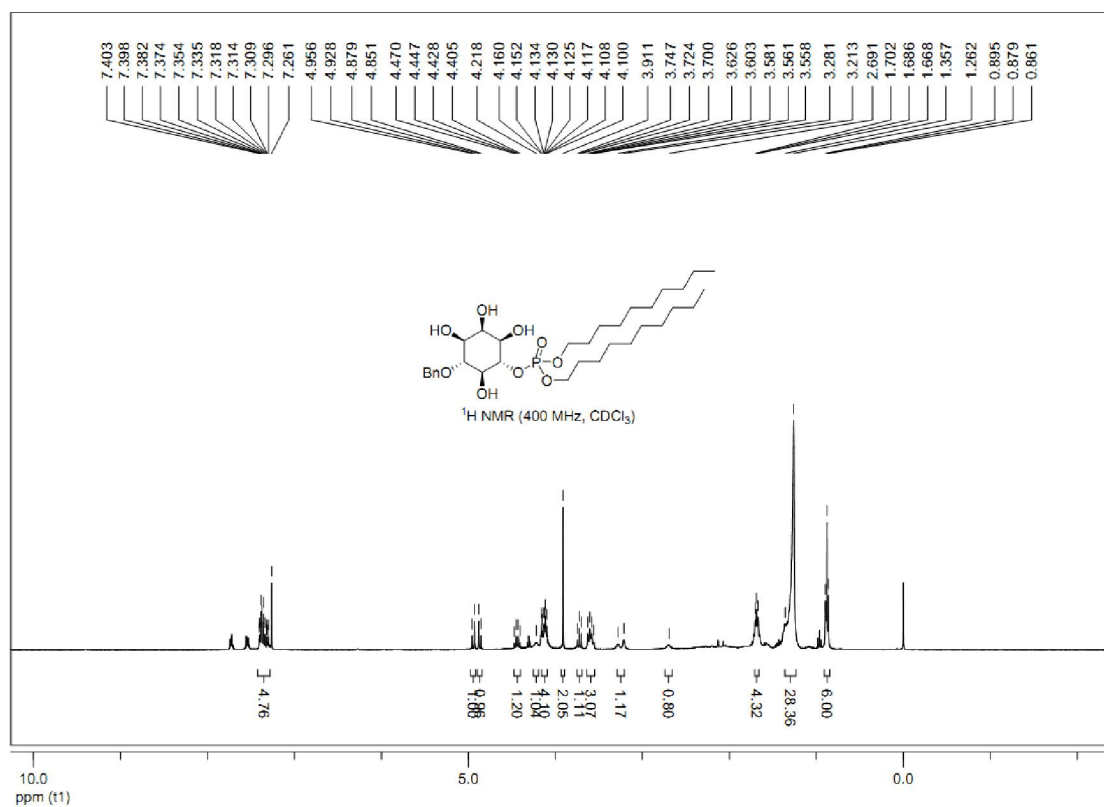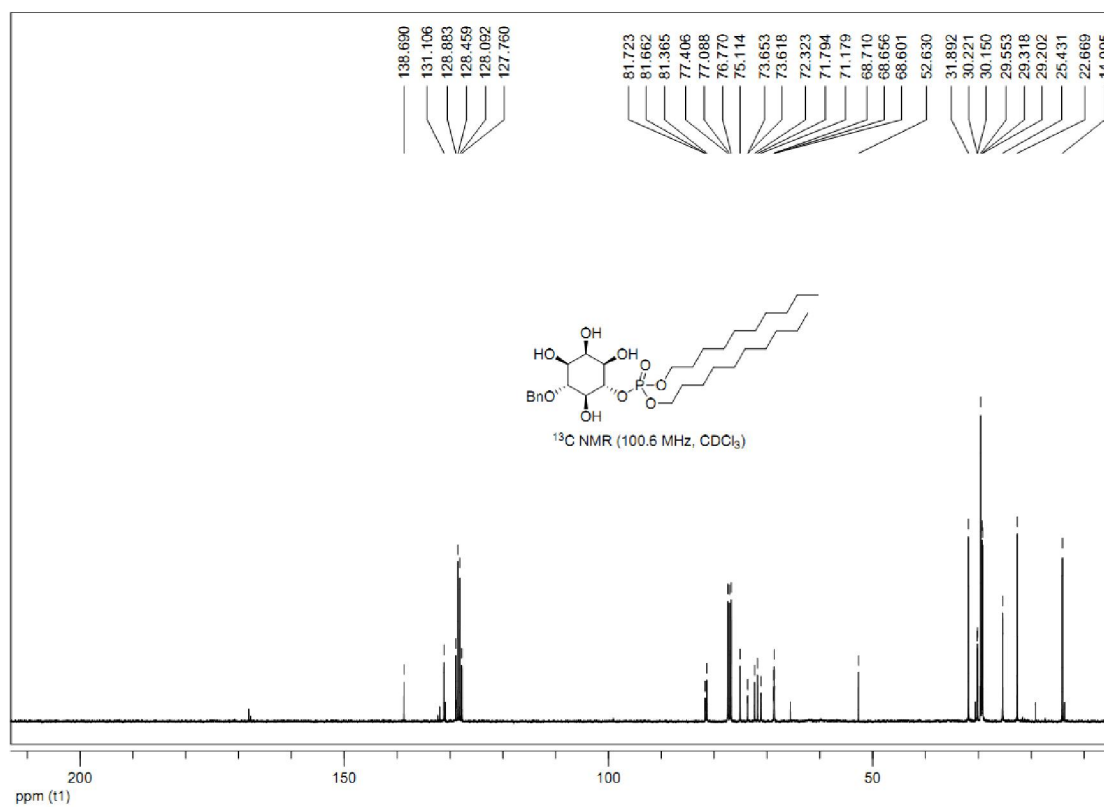

(±)-D-*myo*-inositol-4-(didecyl phosphate) (20)

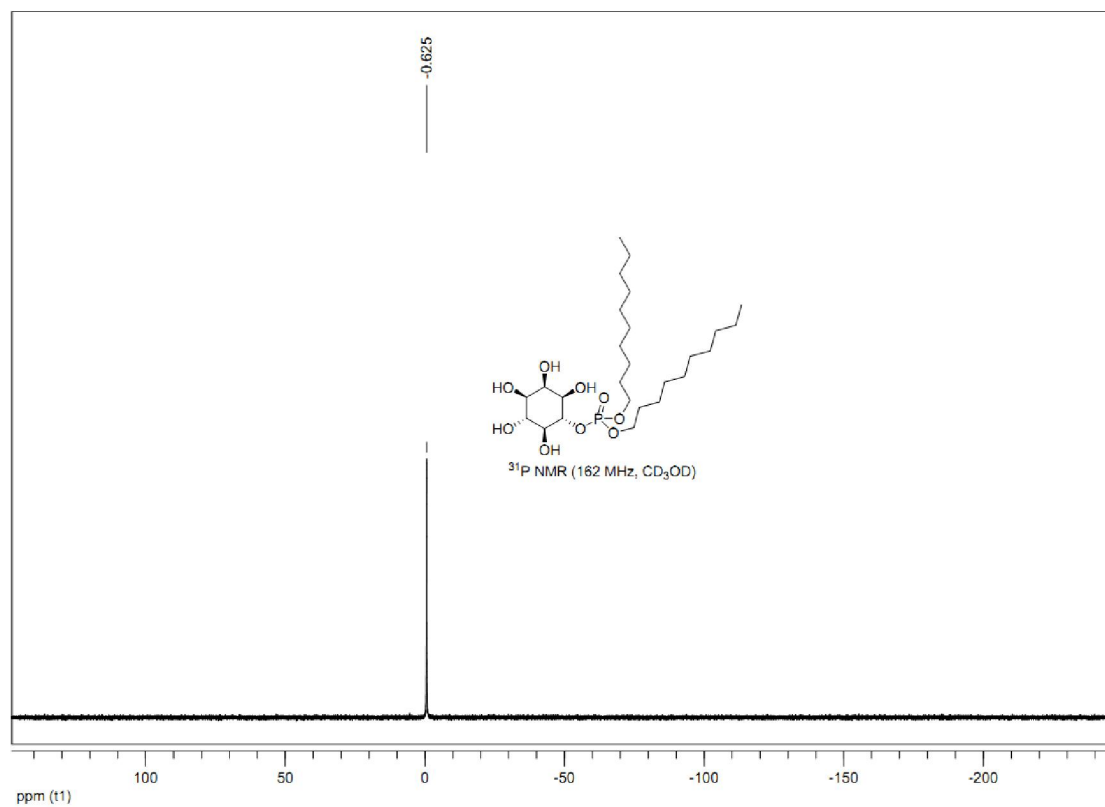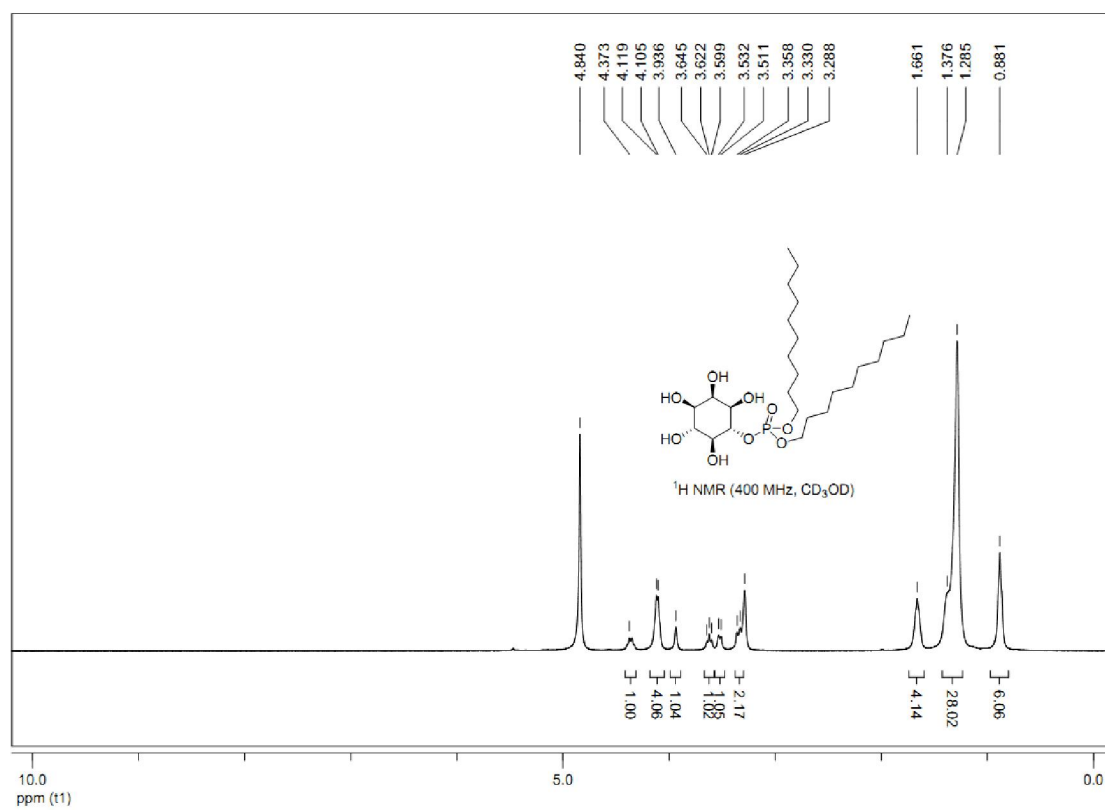

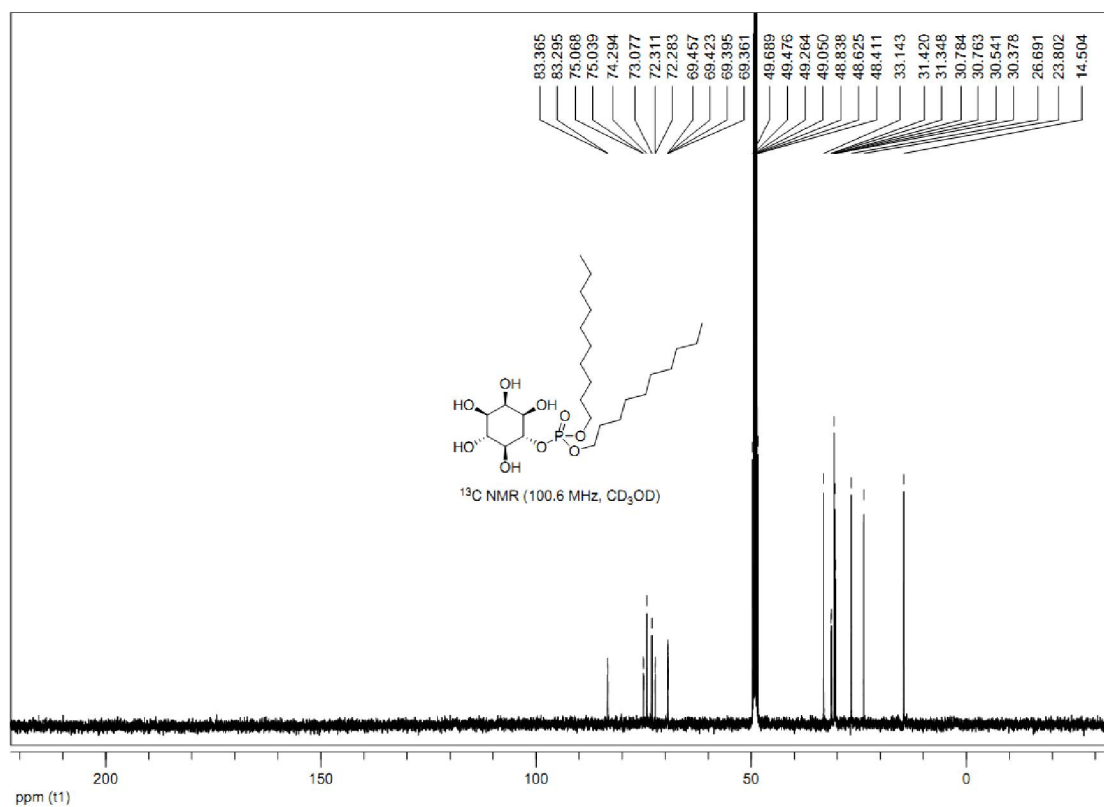

(±)-6-O-benzyl-D-myoinositol-1,3,5-O-orthoformate-4-(didecyl phosphate) (21)

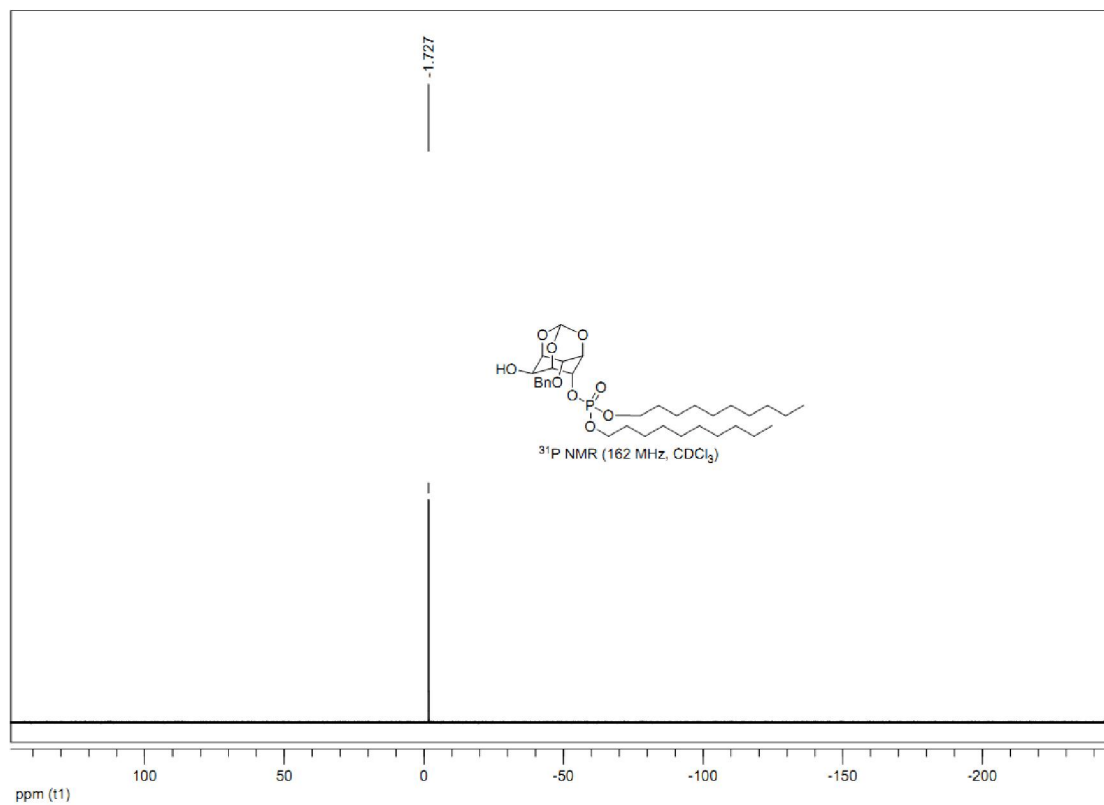

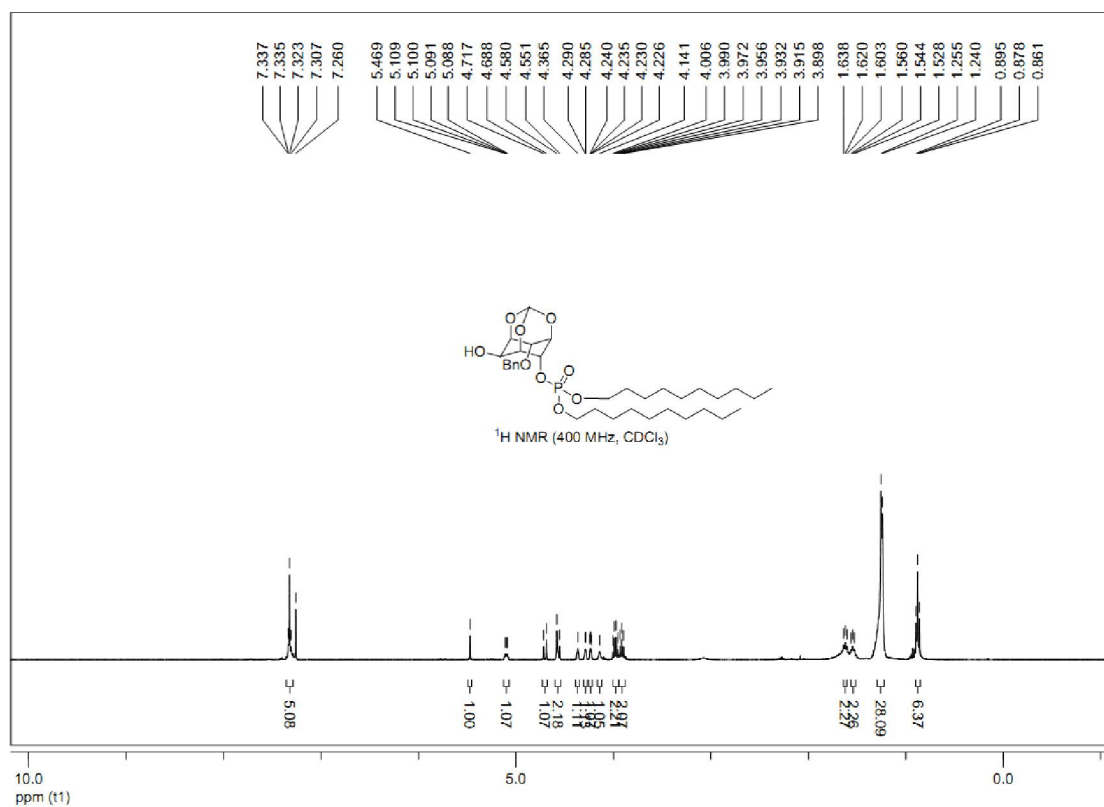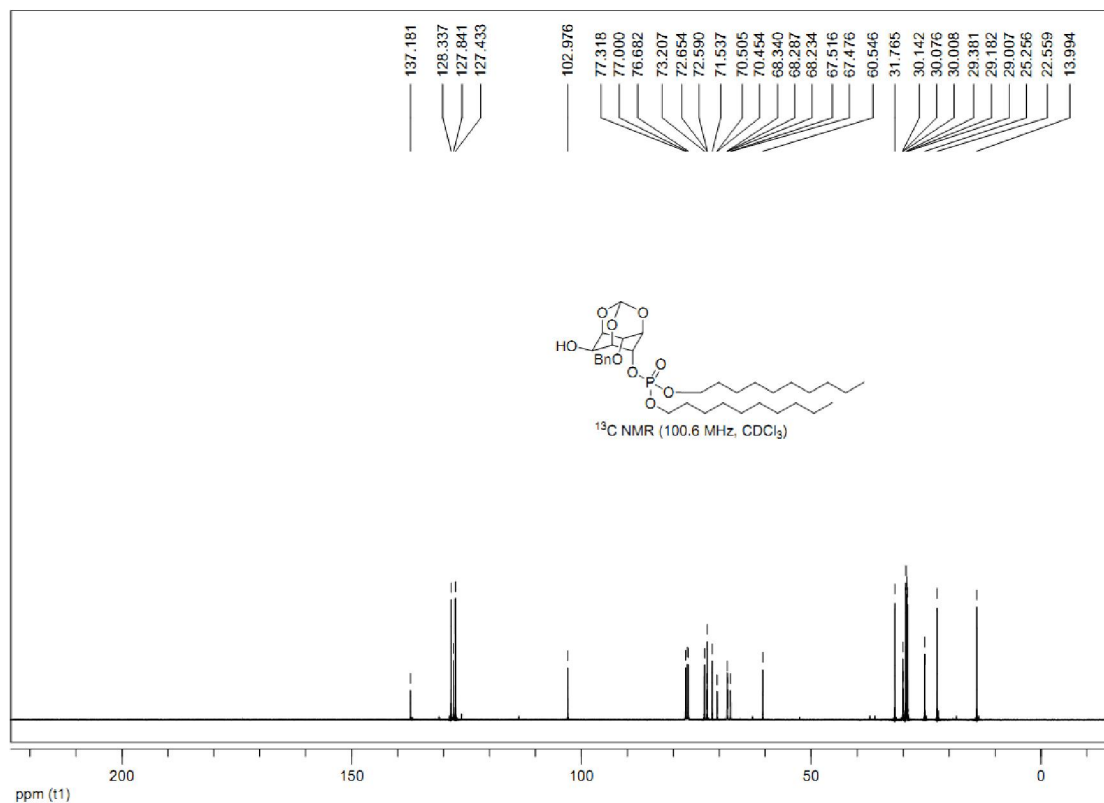

(±)-2-O-*tert*-butyldimethylsilyl-D-*myo*-inositol-1,3,5-O-orthoformate-4-(didecyl phosphate)  
(22)

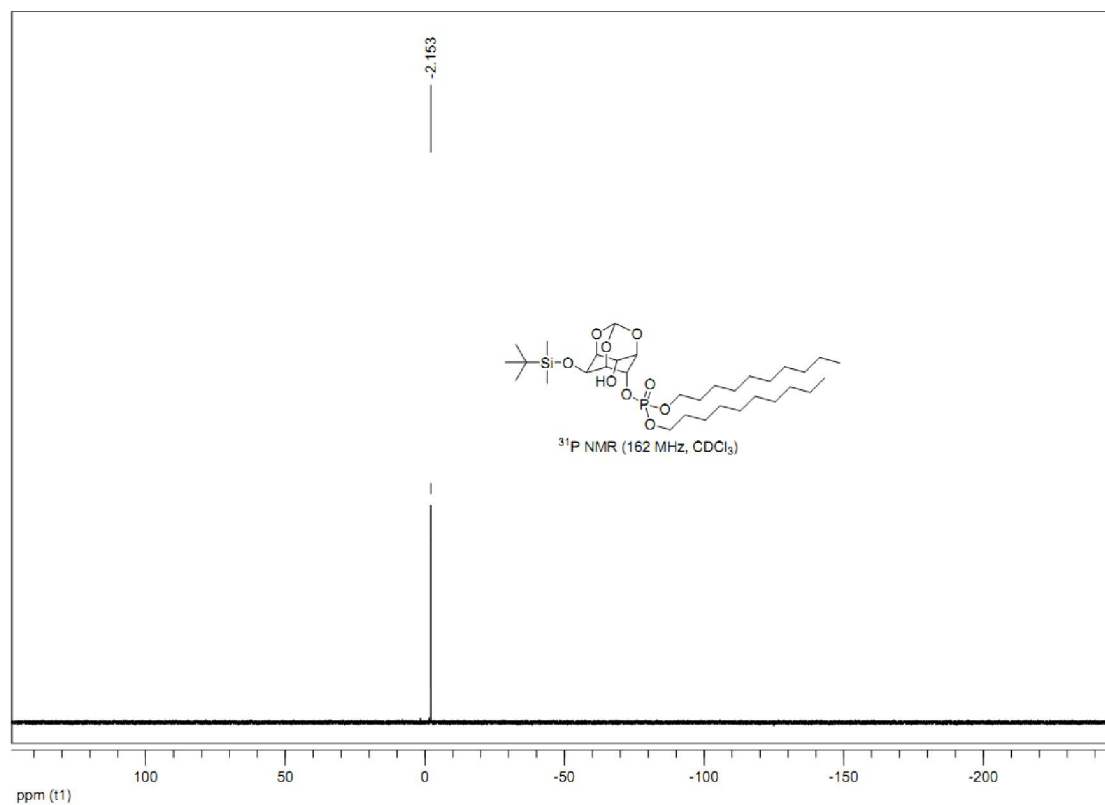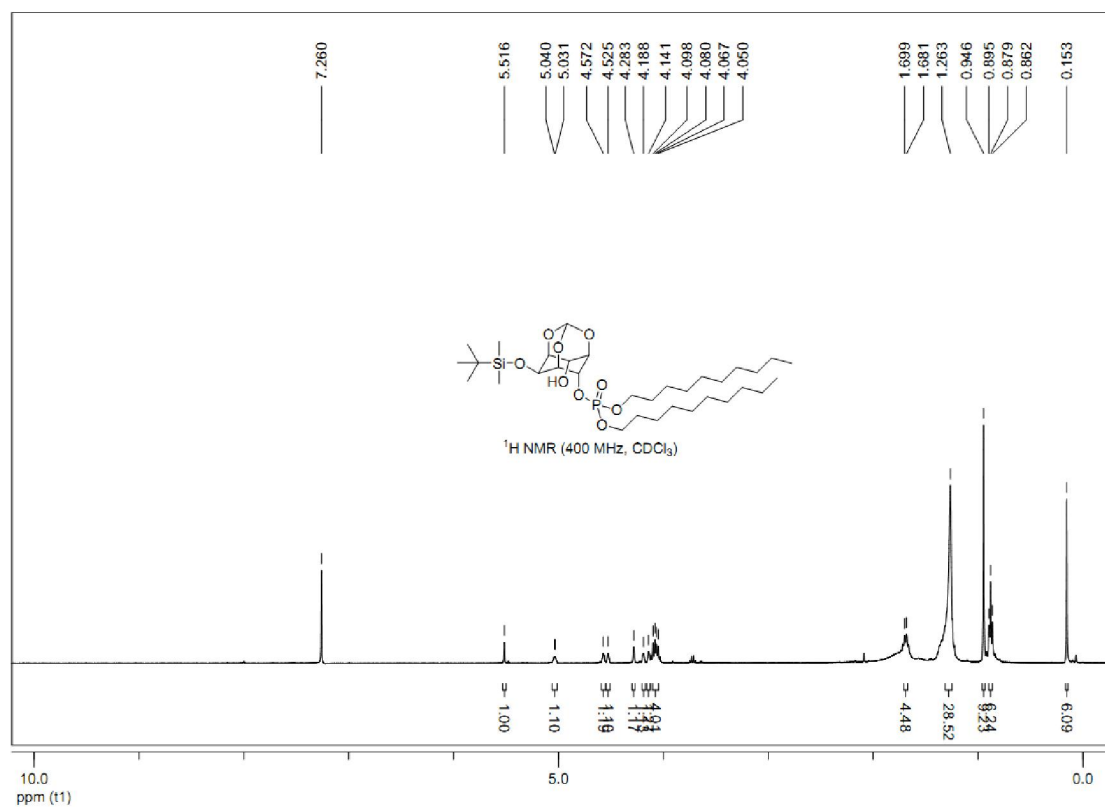

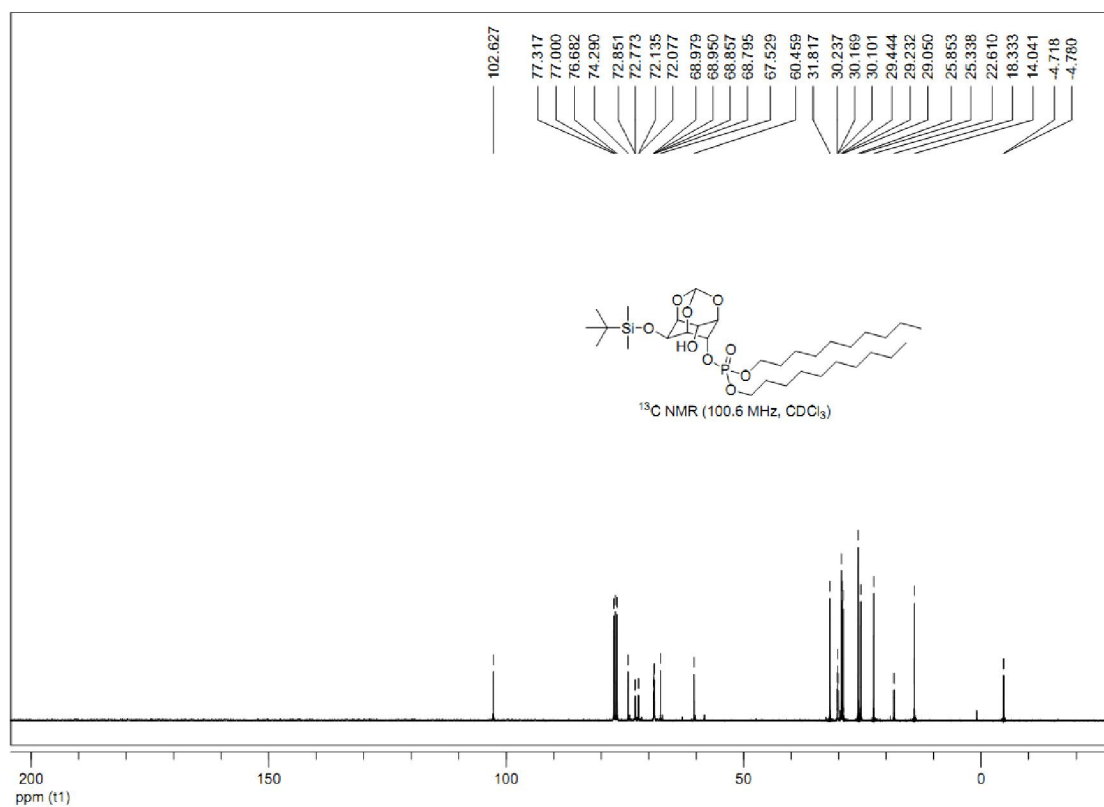

**(±)-D-myoinositol-1,3,5-O-orthoformate-4-(didecyl phosphate) (23)**

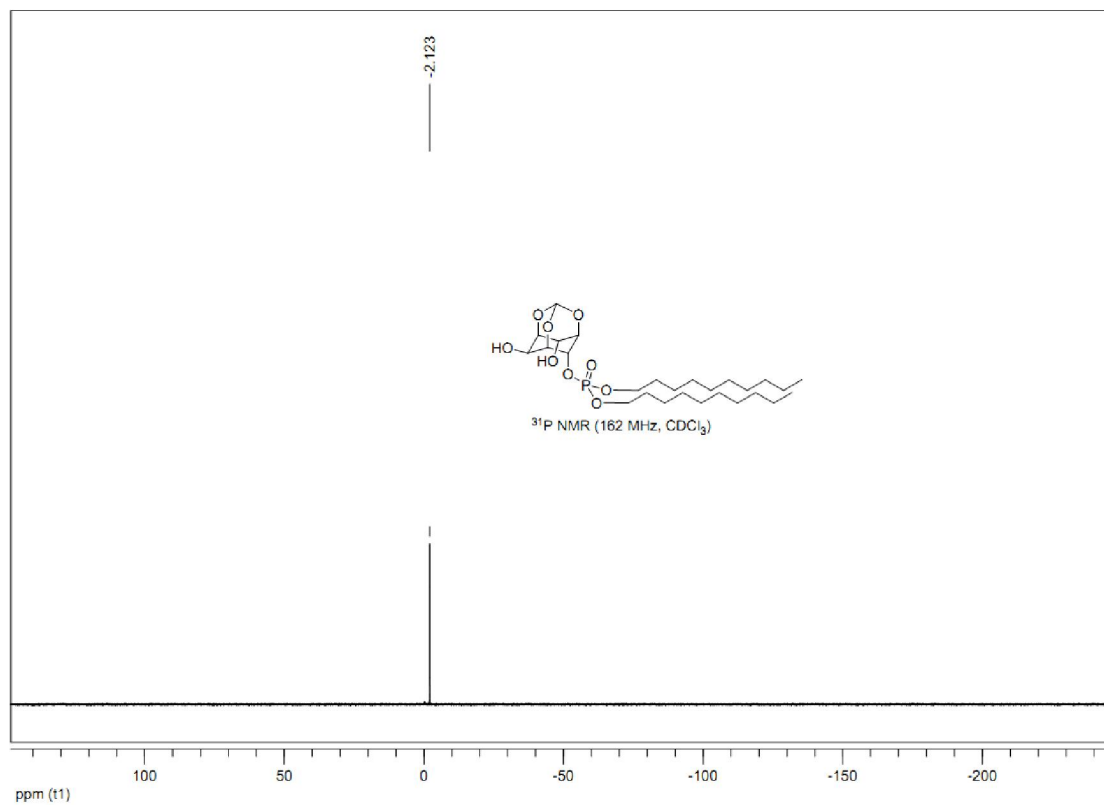



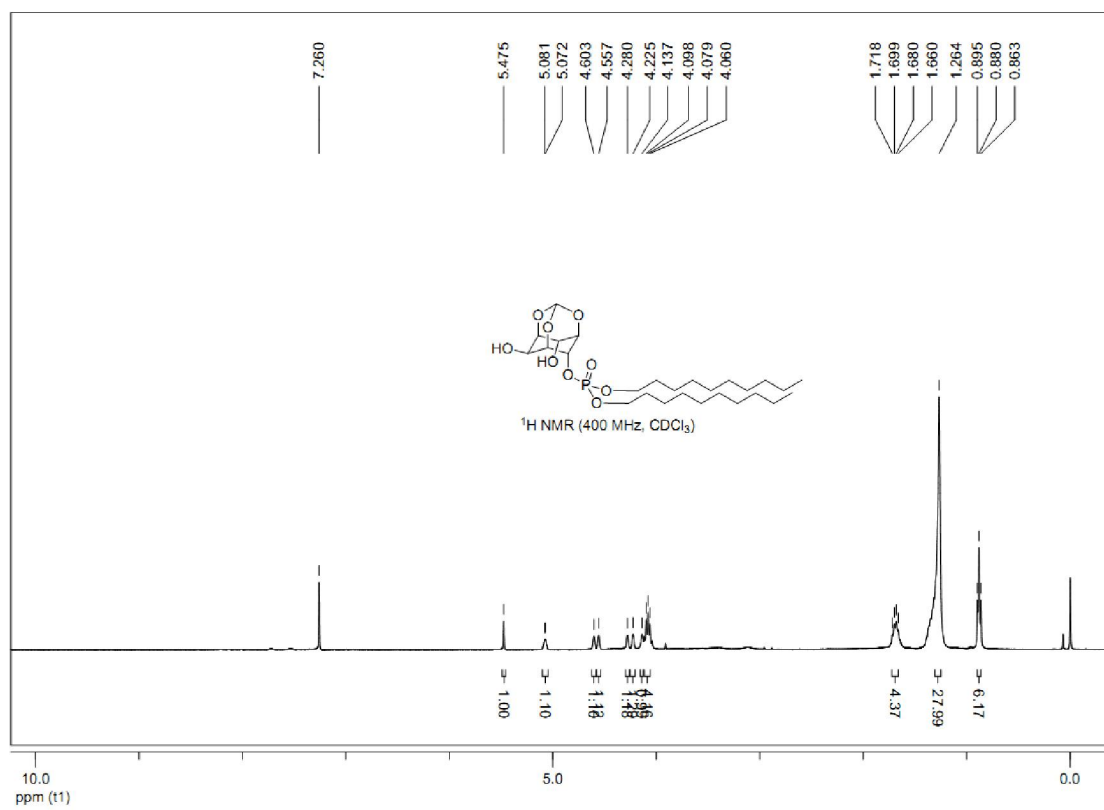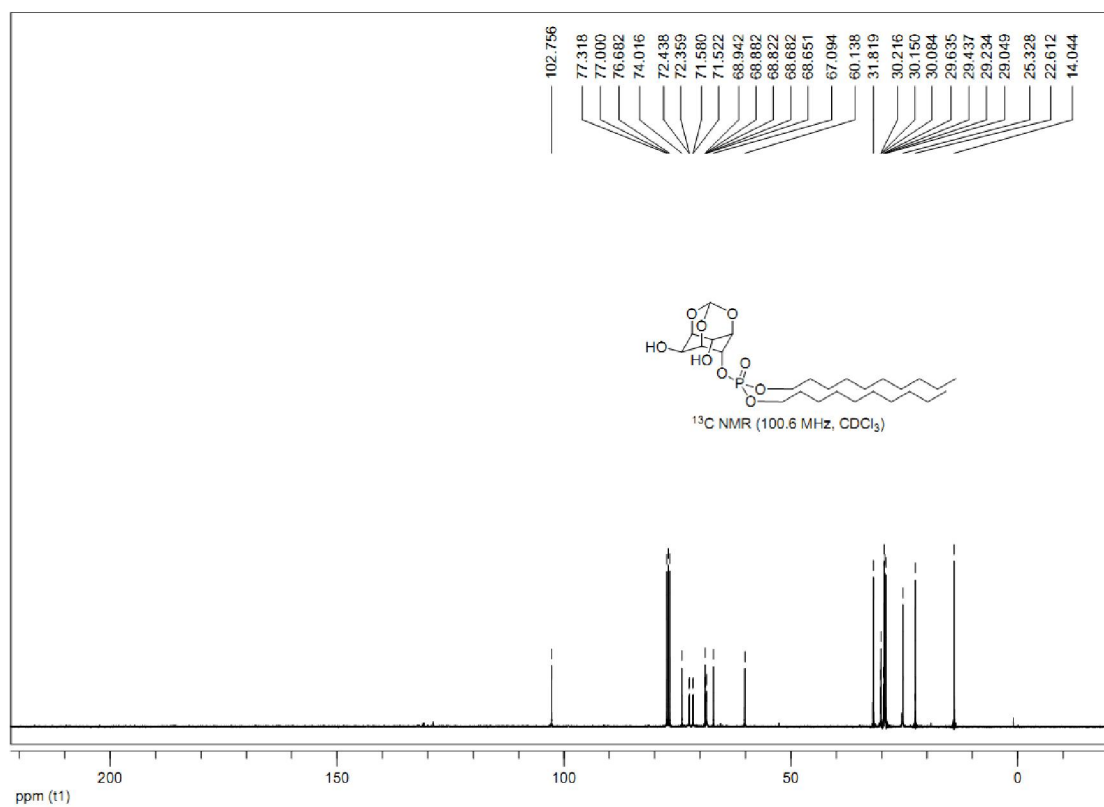

**meso-2,4,6-tri-O-benzyl-1,3-O-methylidene-D-myo-inositol-5-(didecyl phosphate) (24)**

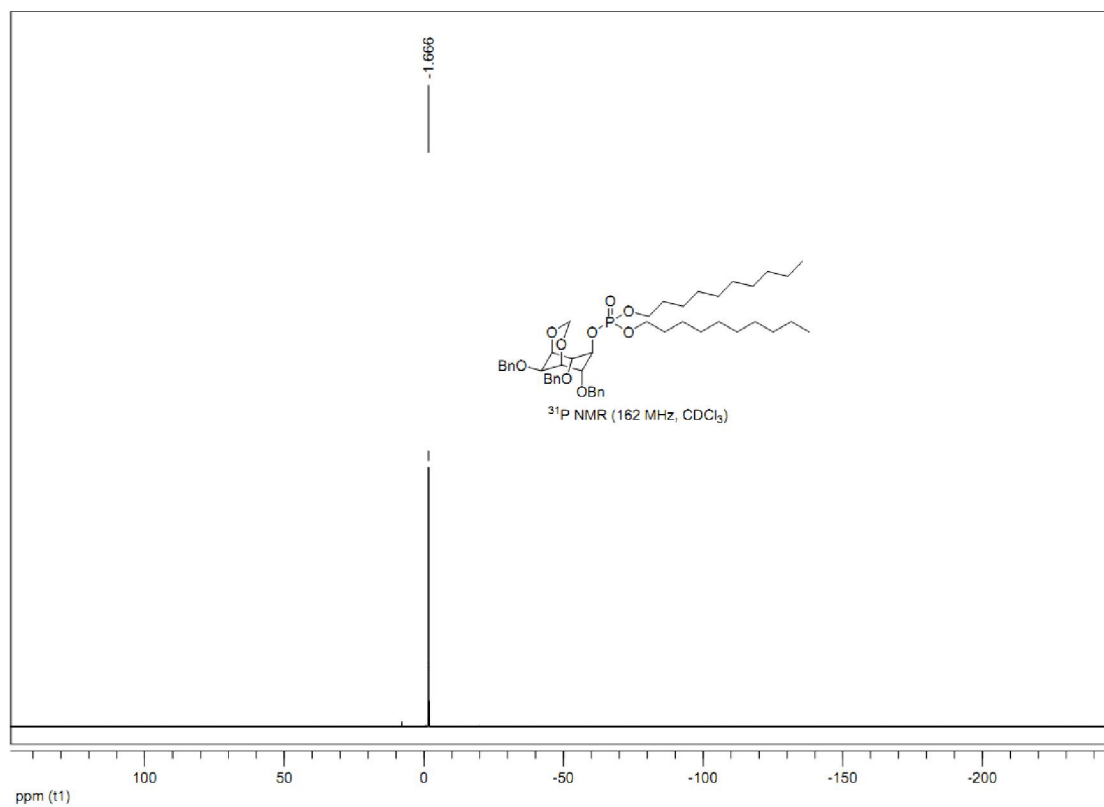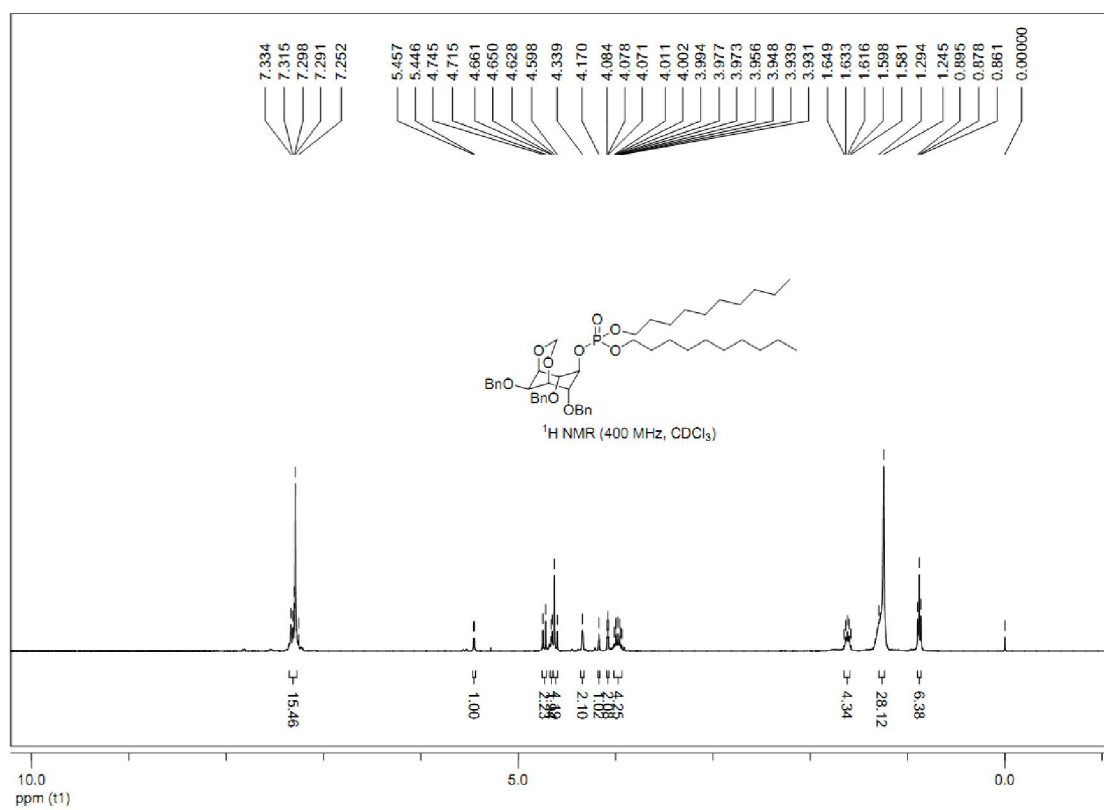

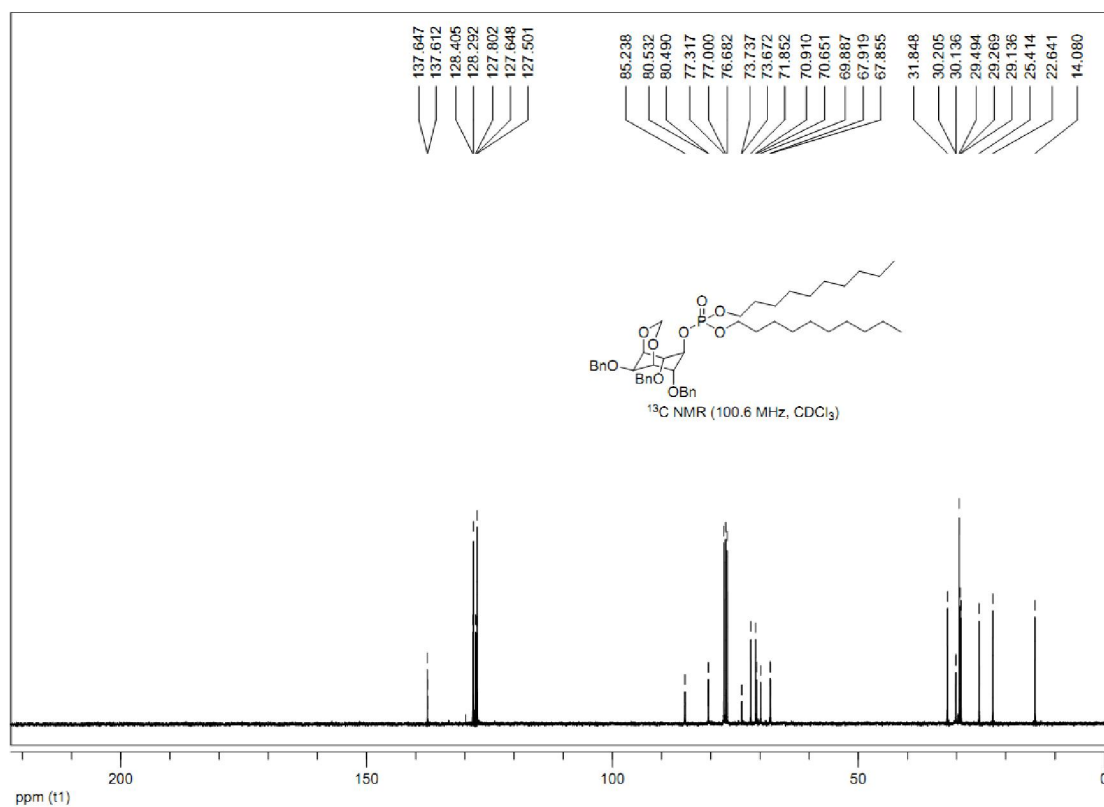

**meso-2,4,6-tri-O-benzyl-D-myoinositol-5-(didecyl phosphate) (25)**

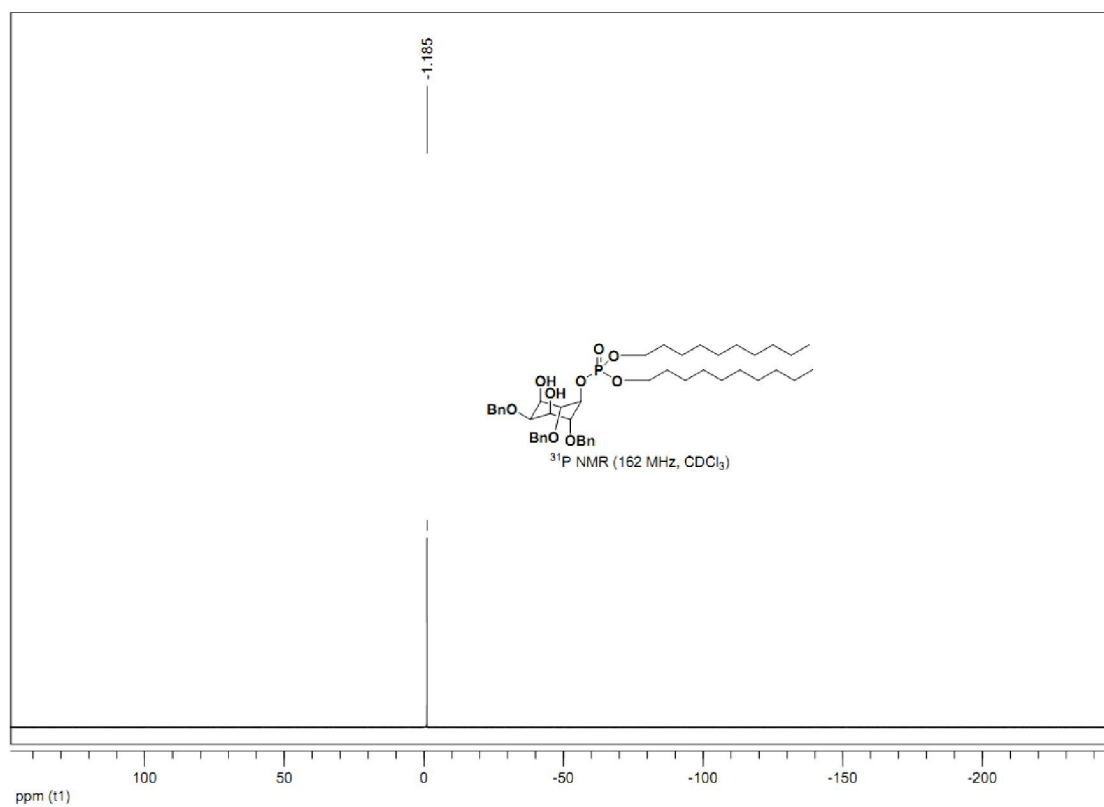

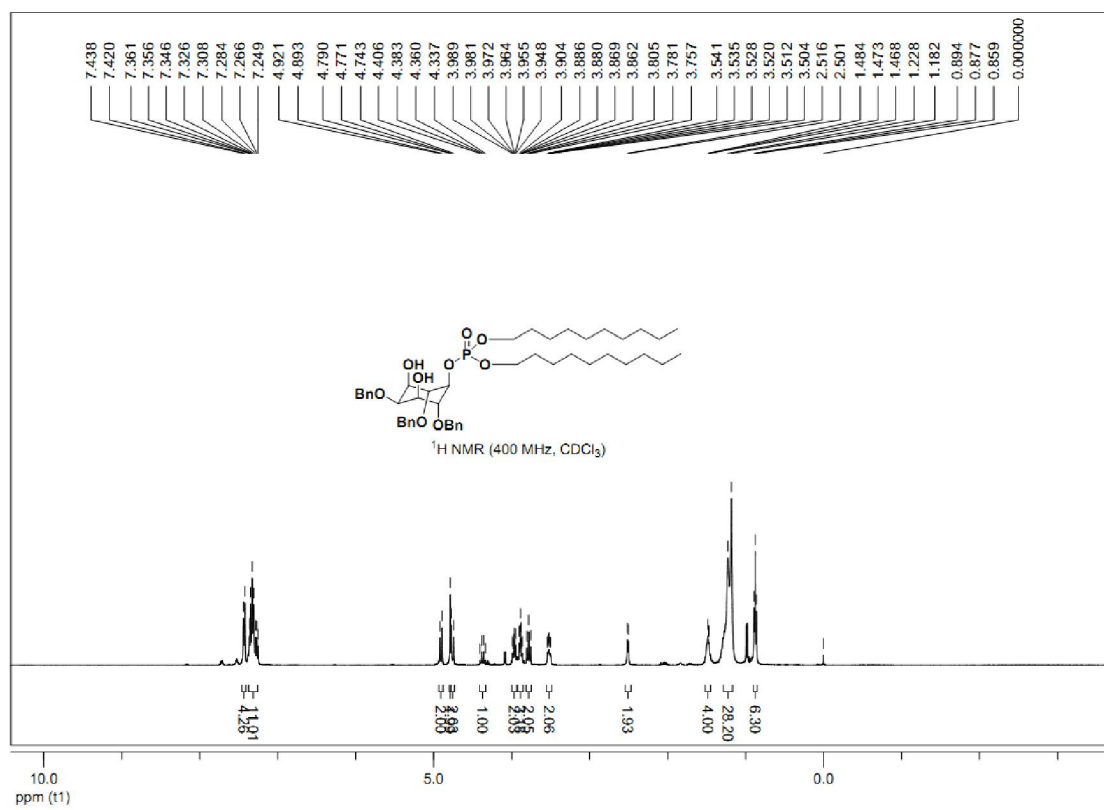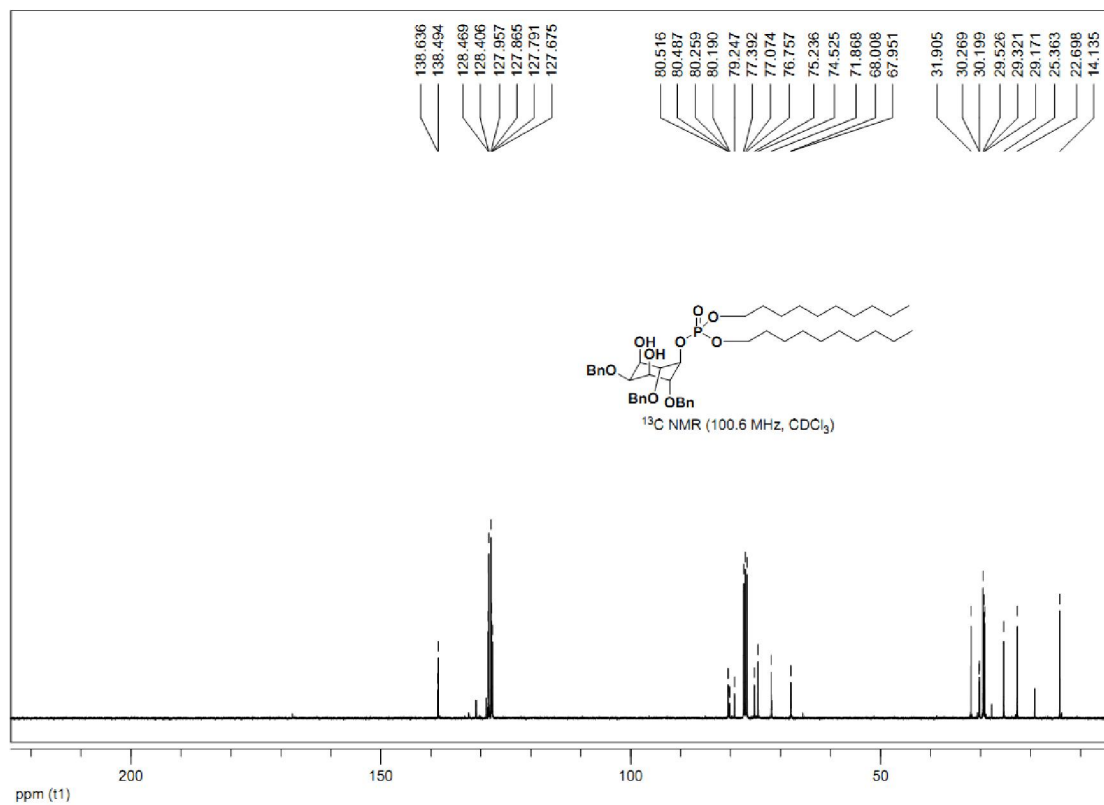

**meso-D-*myo*-inositol-5-(didecyl phosphate) (26)**

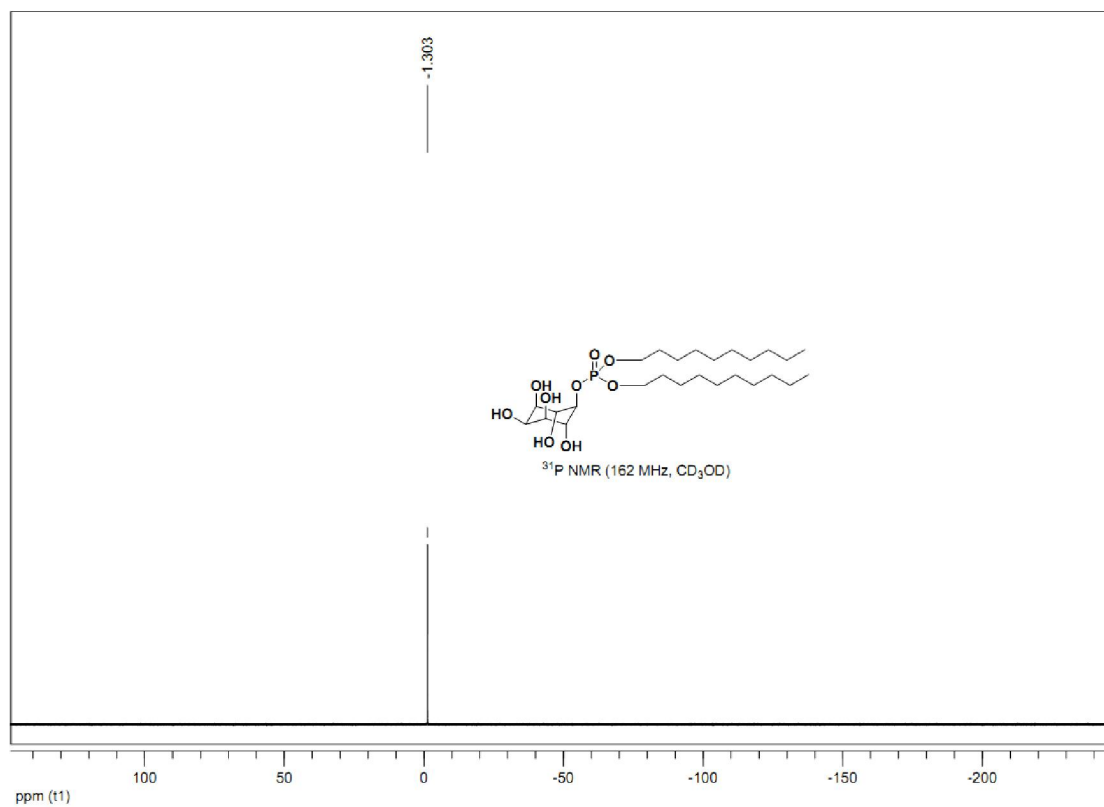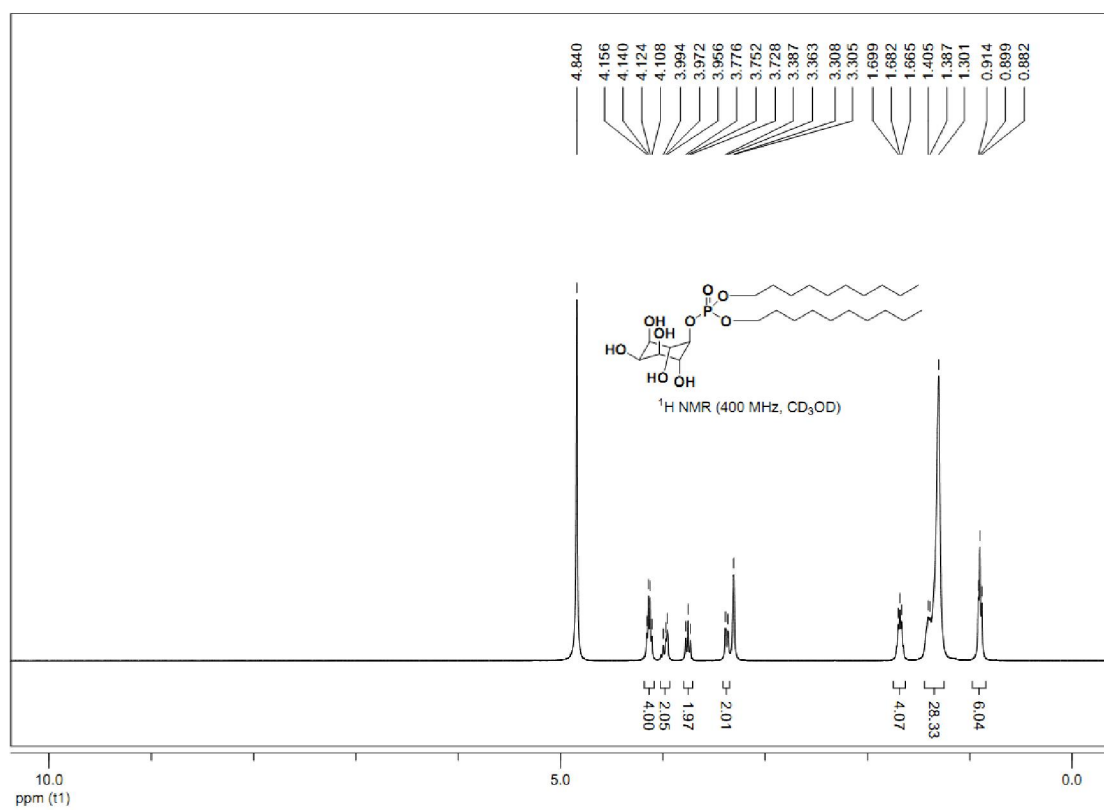

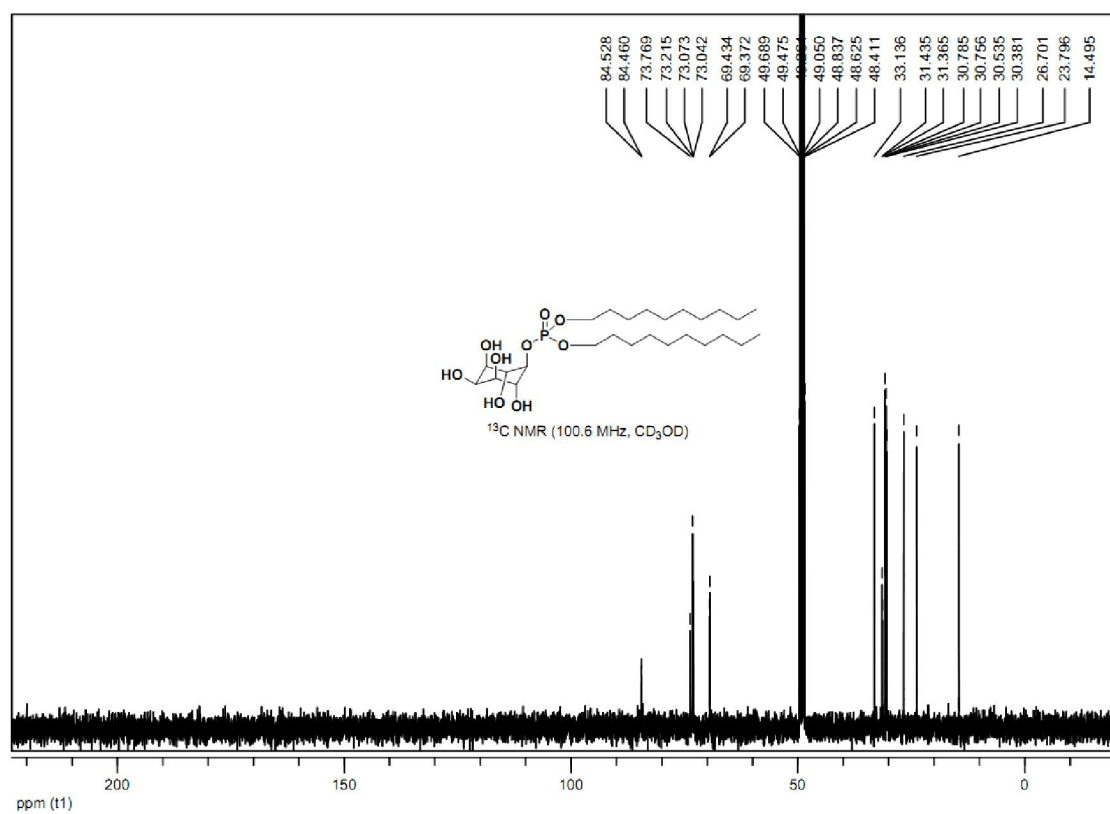

**meso-1,3-O-methylidene-D-myoinositol-5-(didecyl phosphate) (27)**

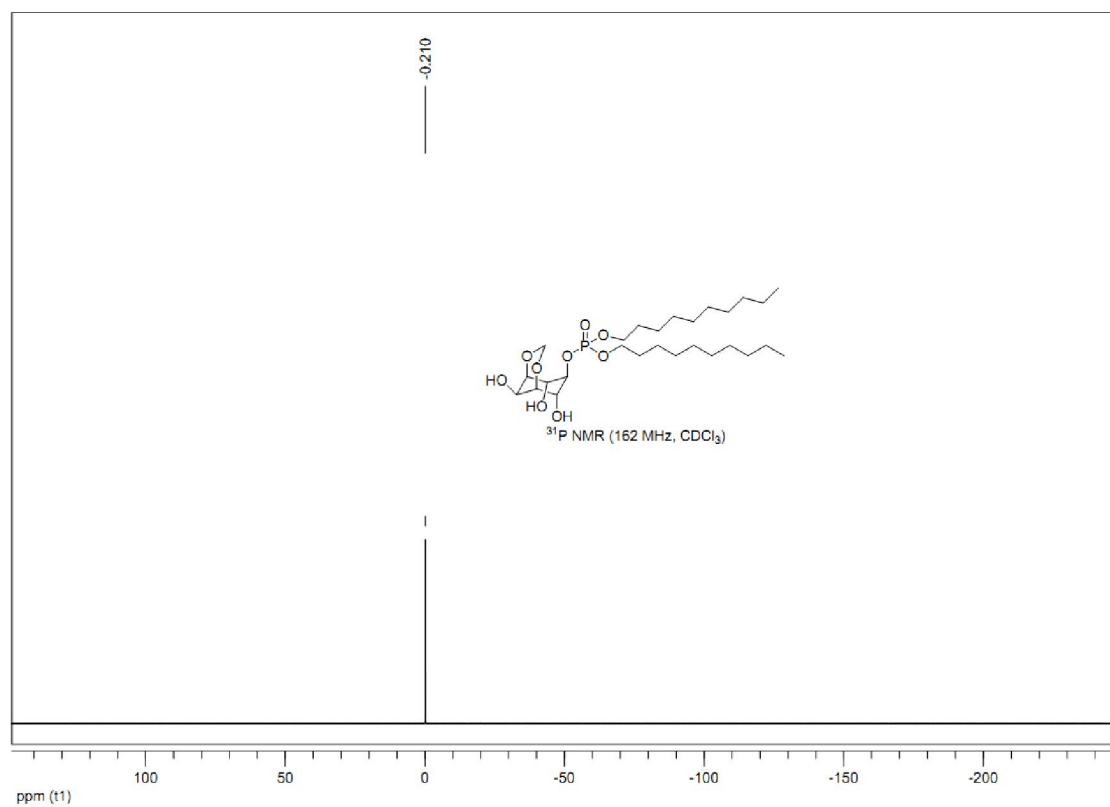

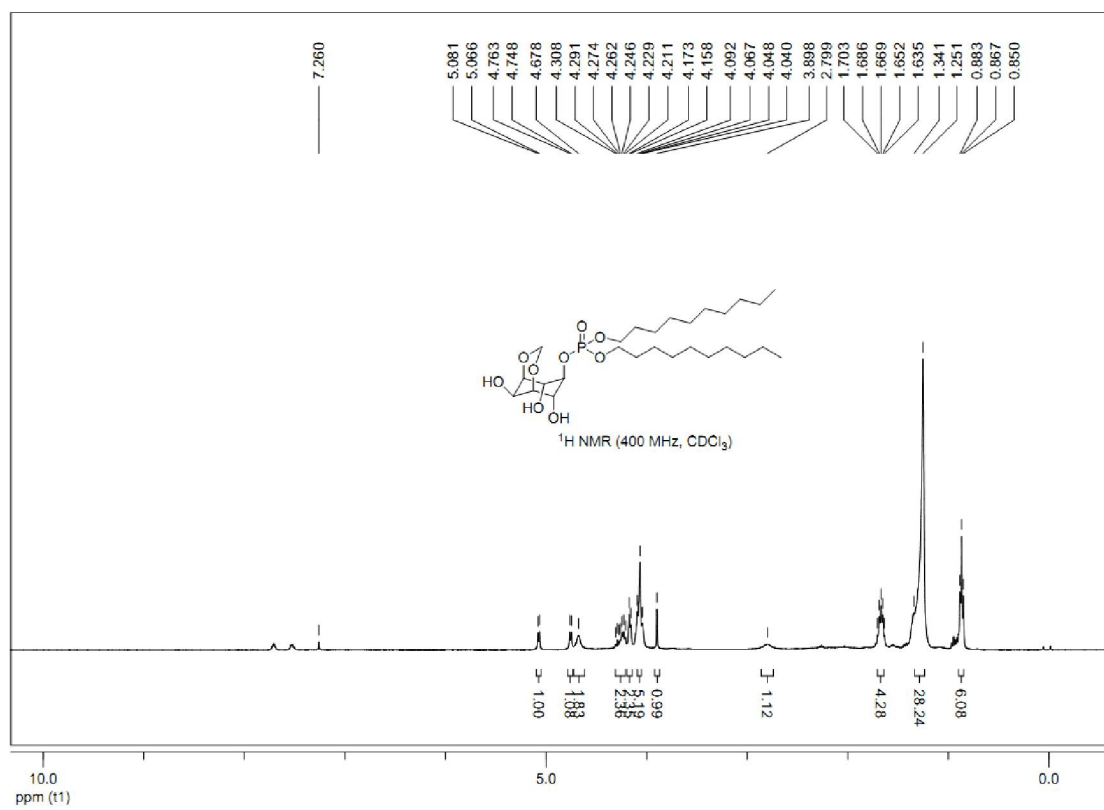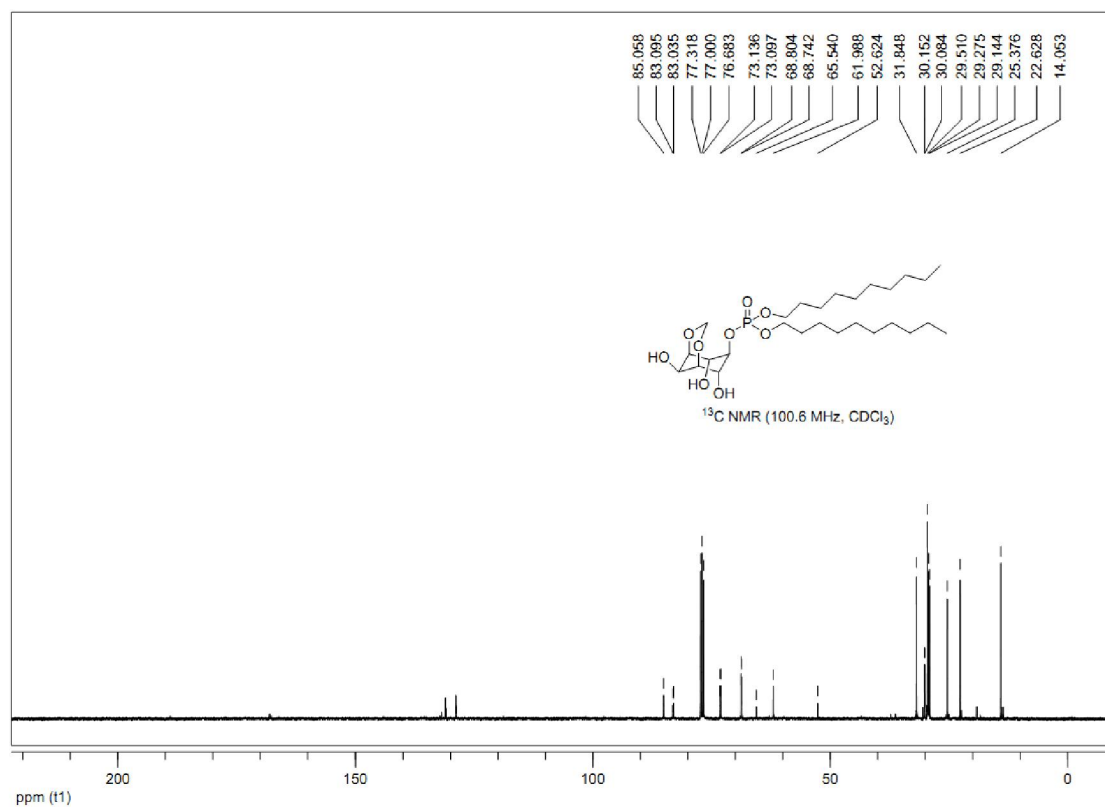

(±)-1,3,5-O-orthoformate-D-*myo*-inositol-2,4-bi(didecyl phosphate) (28)

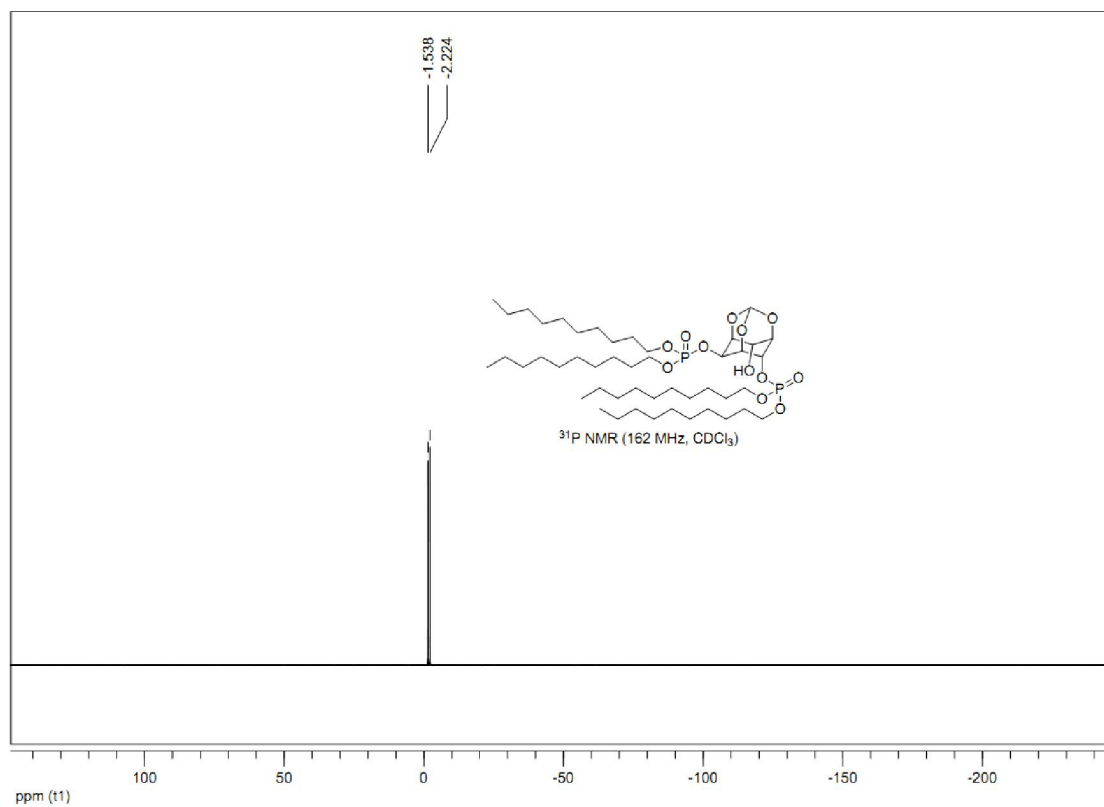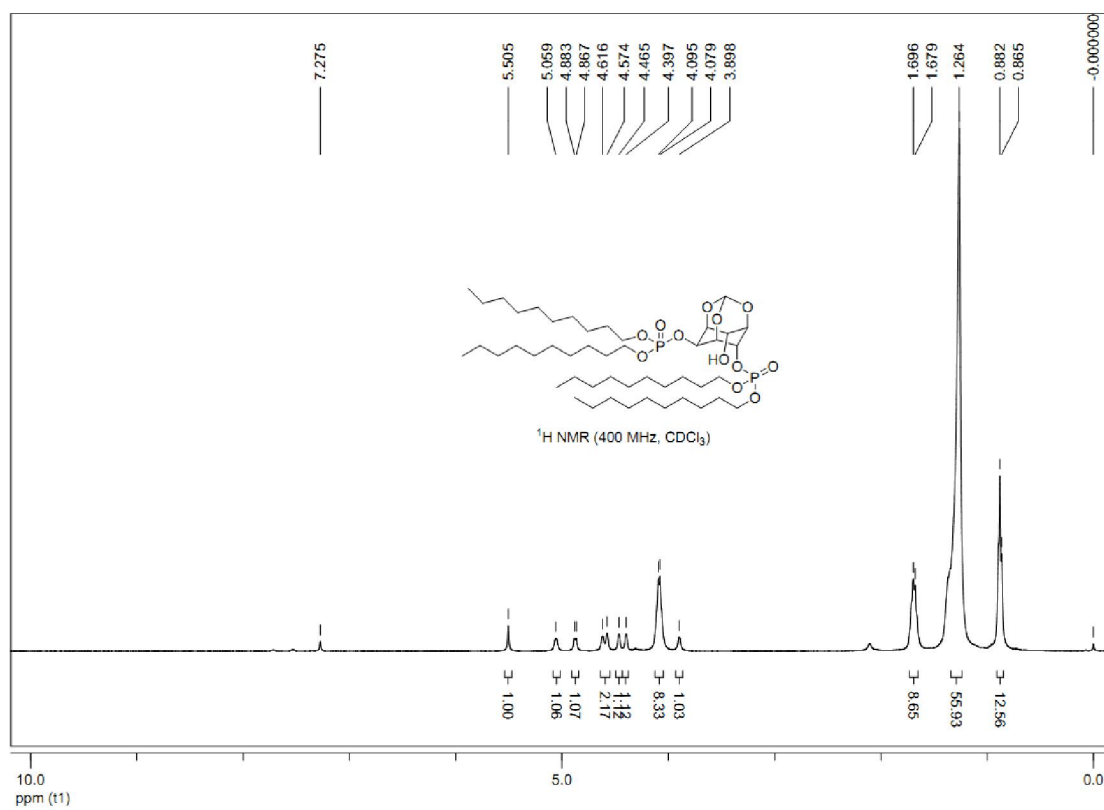



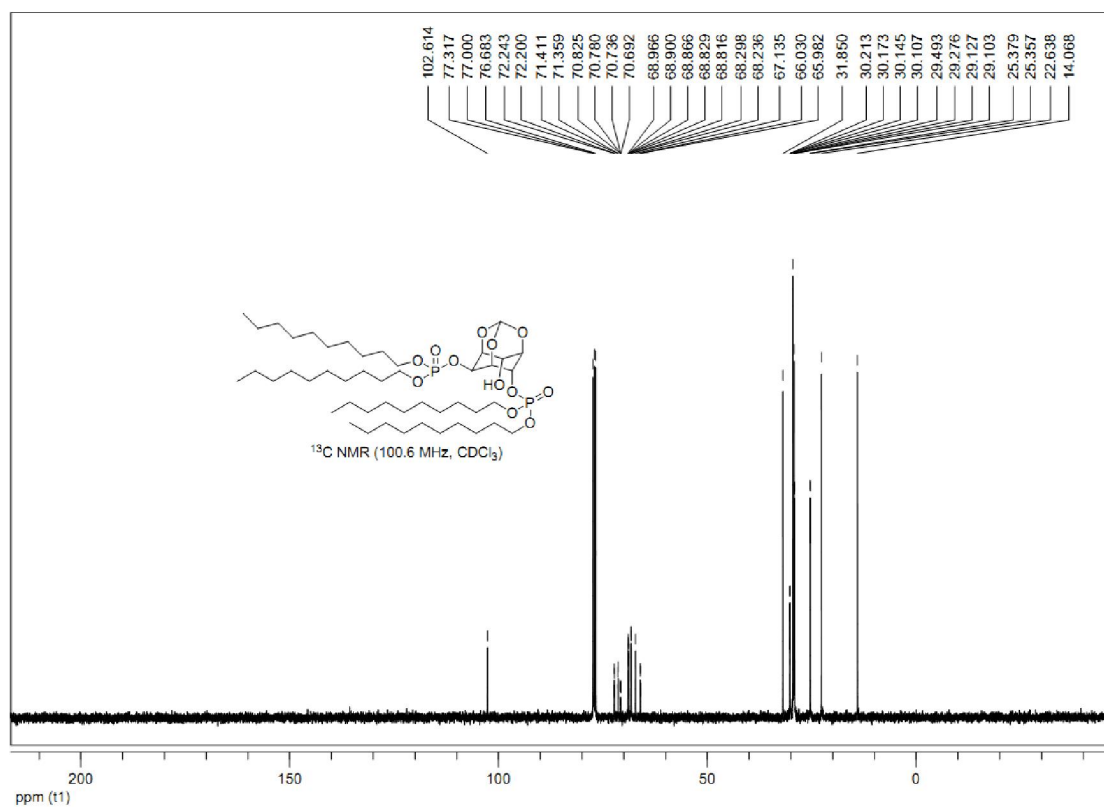

**meso-1,3,5-O-orthoformate-D-myo-inositol-2,4,6-tri(didecyl phosphate) (29)**

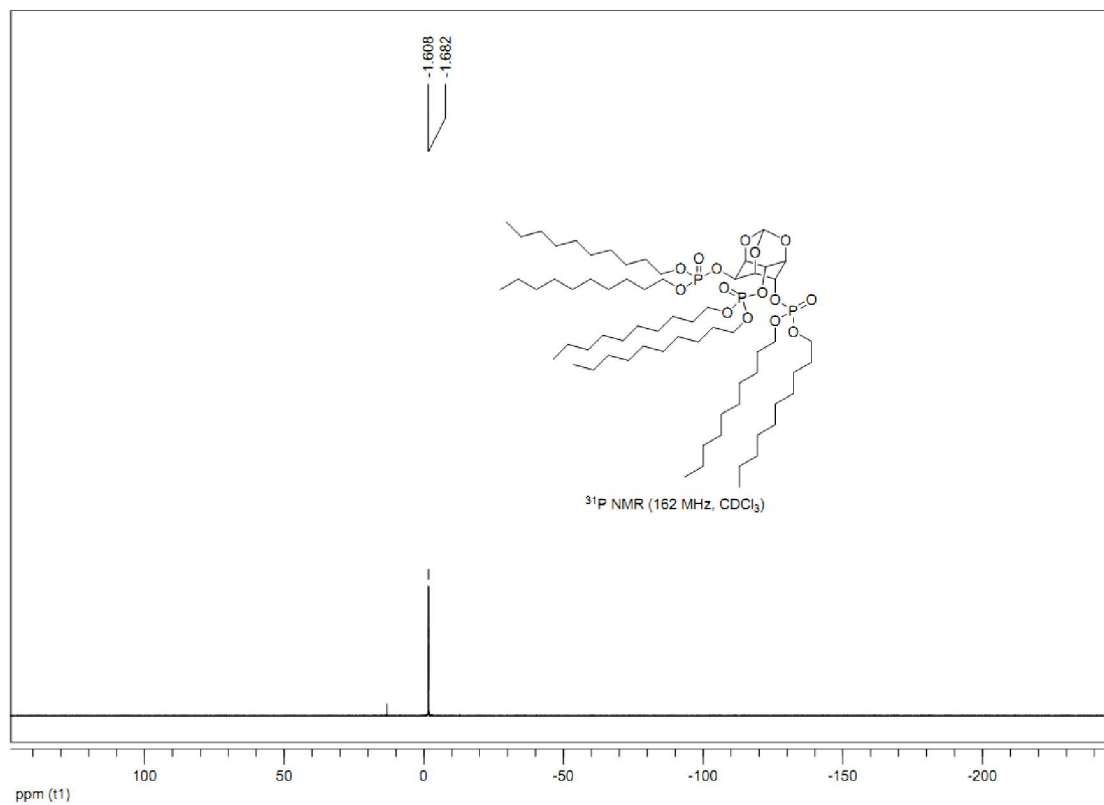

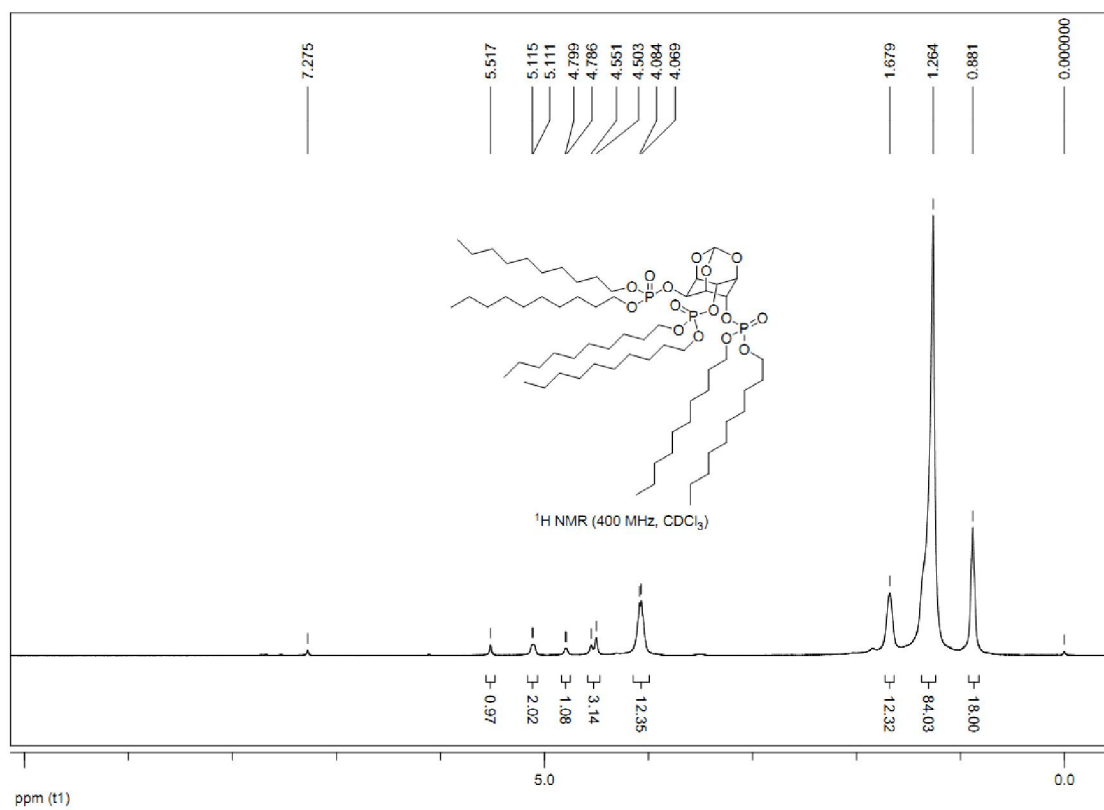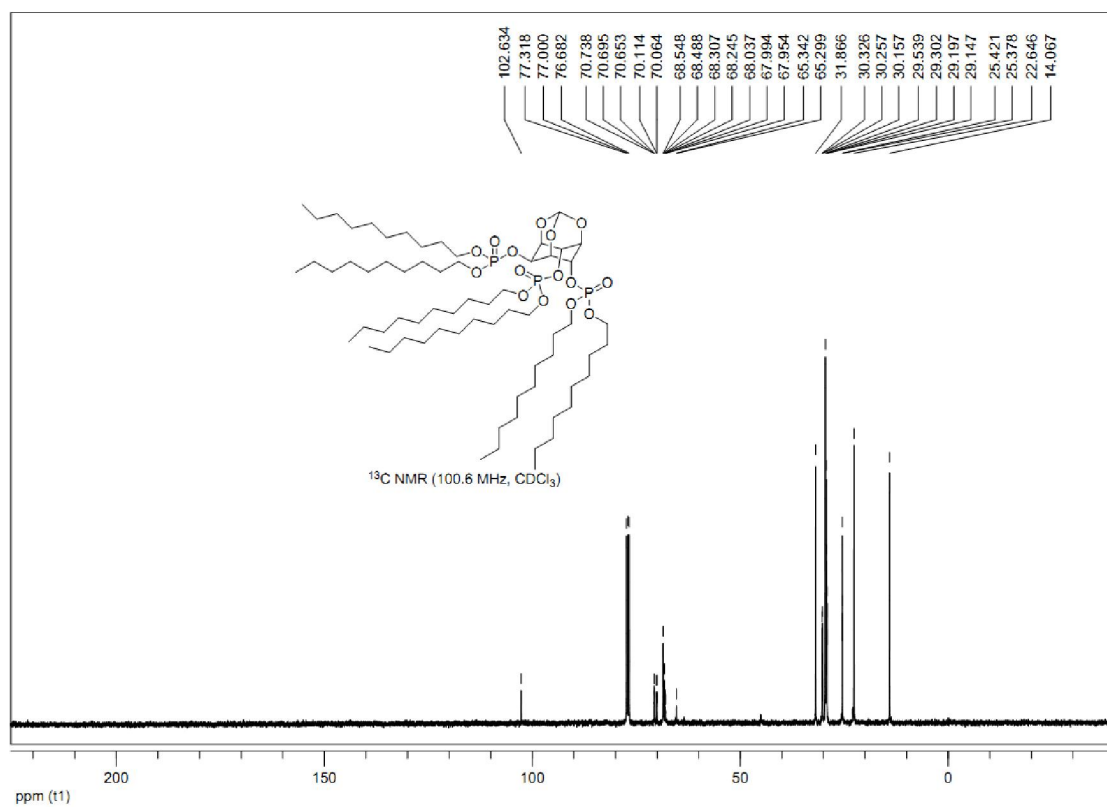

**meso-1,3,5-O-orthoformate-D-myco-inositol-4,6-bi(dimethyl phosphate)-2-(didecyl phosphate)  
(30)**

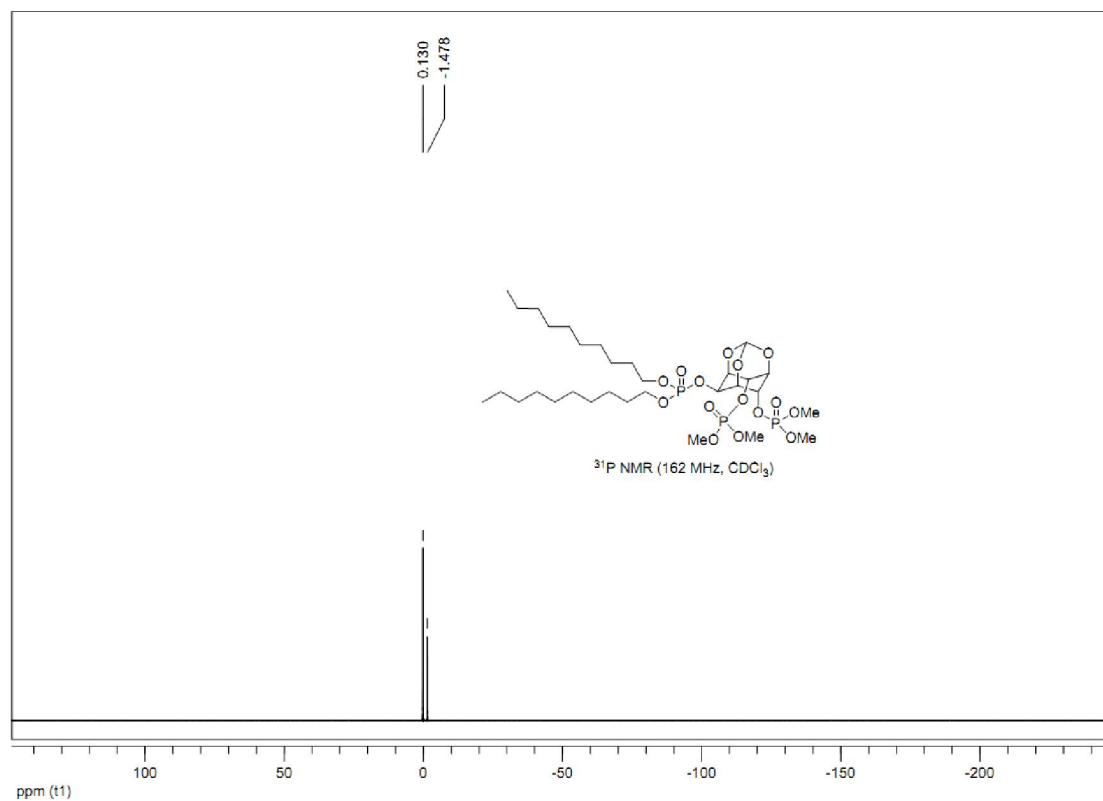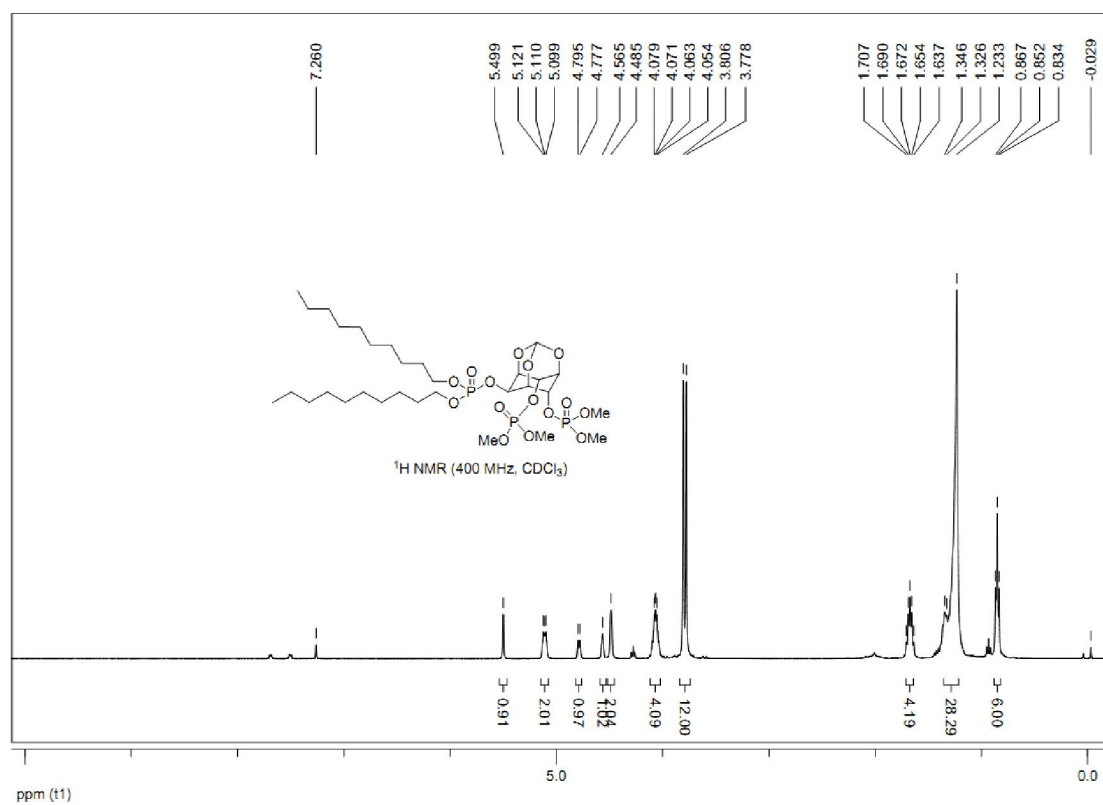

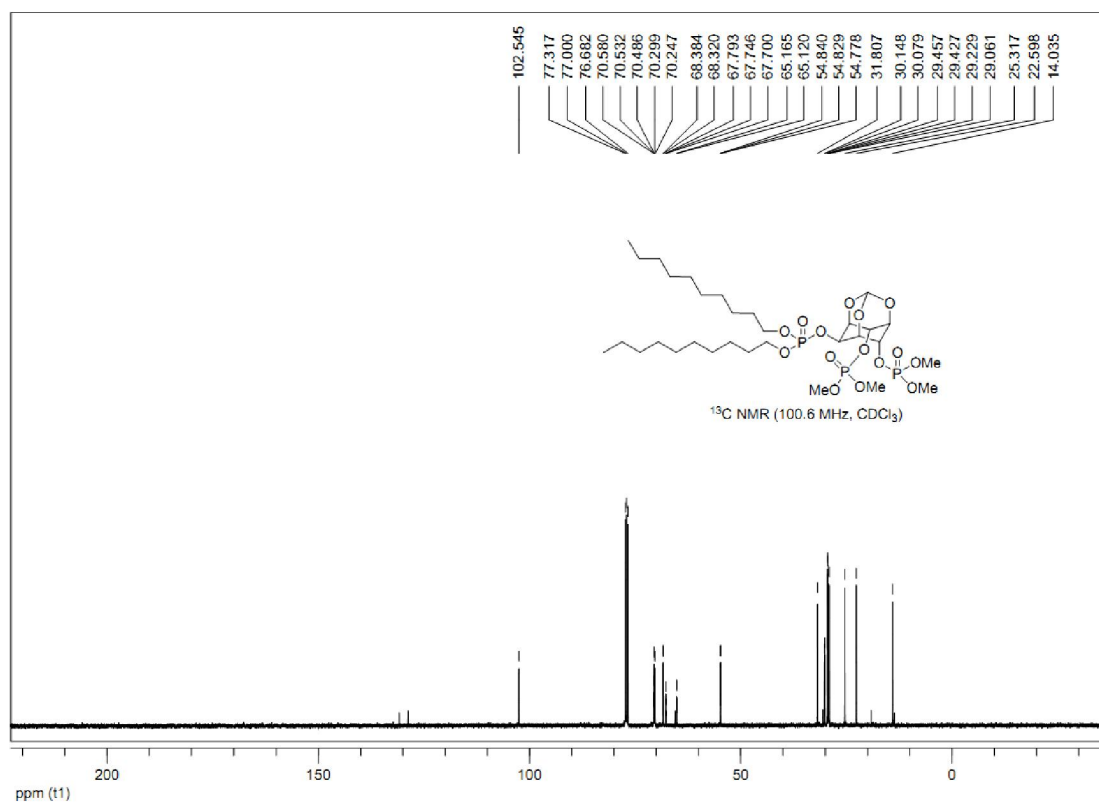

(±)-6-O-benzyl-D-*myo*-inositol-1,3,5-O-orthoformate-2-(dimethyl phosphate)-4-(didecyl phosphate) (31)

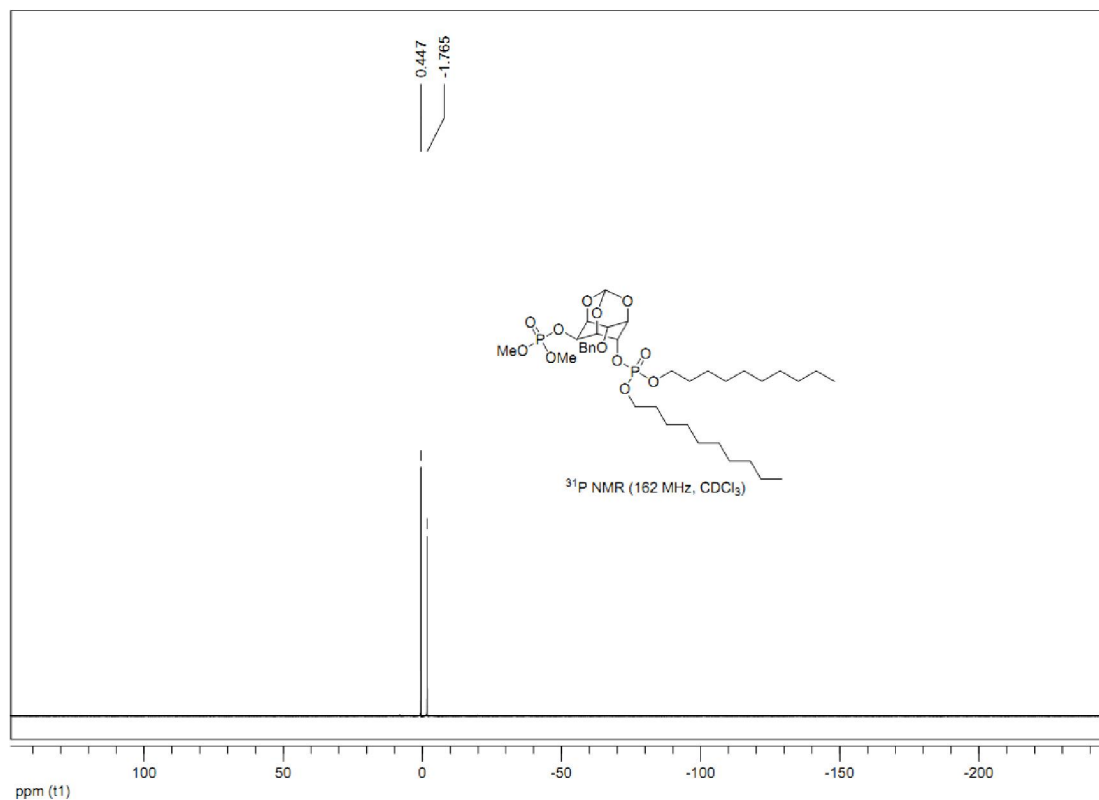

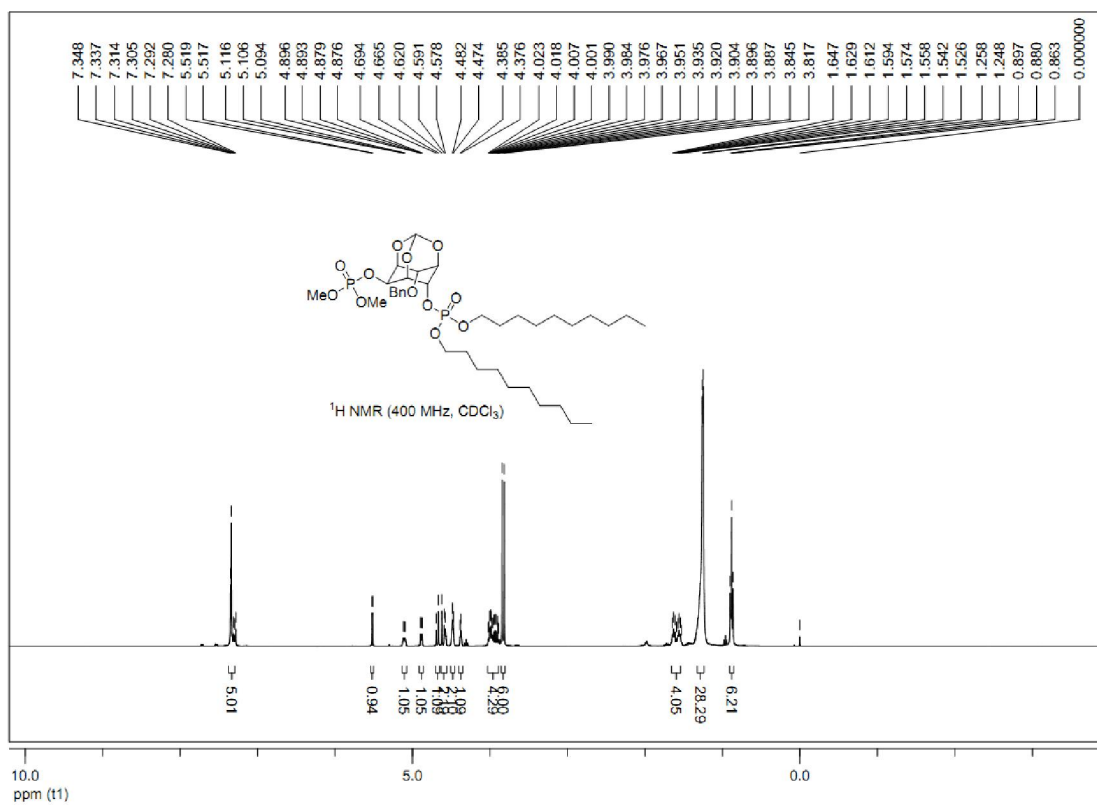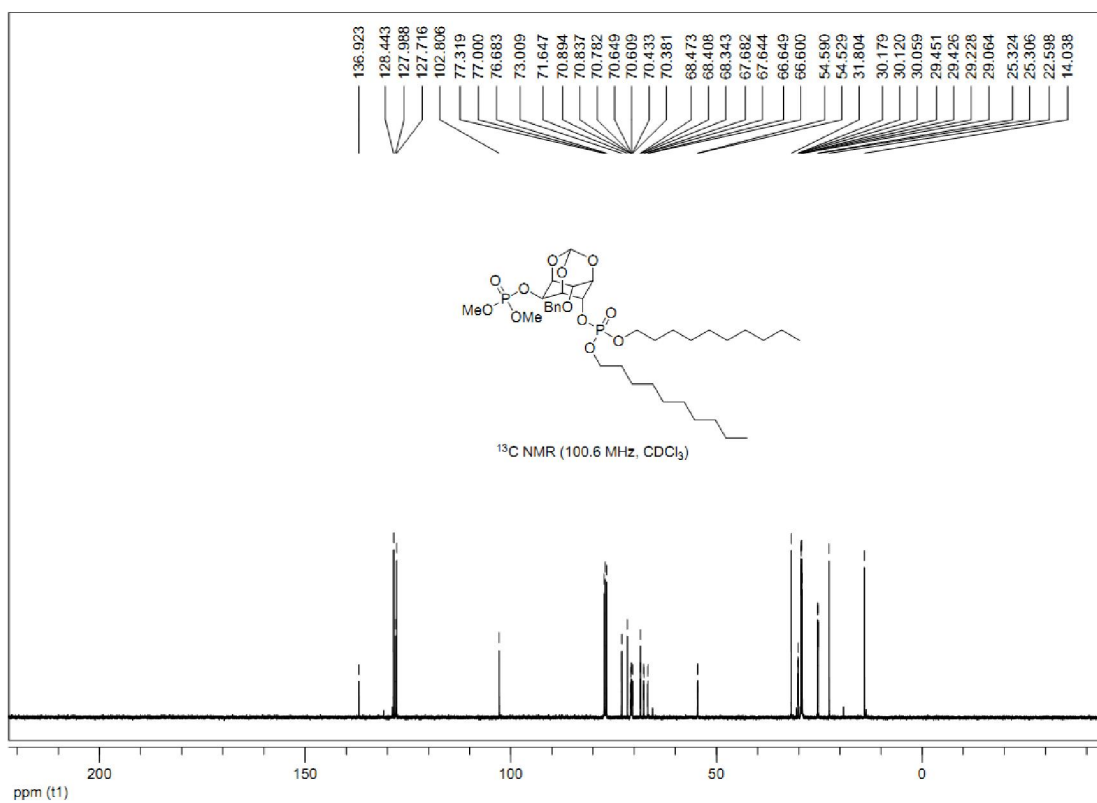

(±)-6-O-benzyl-D-*myo*-inositol-1,3,5-O-orthoformate-2-(dibenzyl phosphate)-4-(didecyl phosphate) (32)

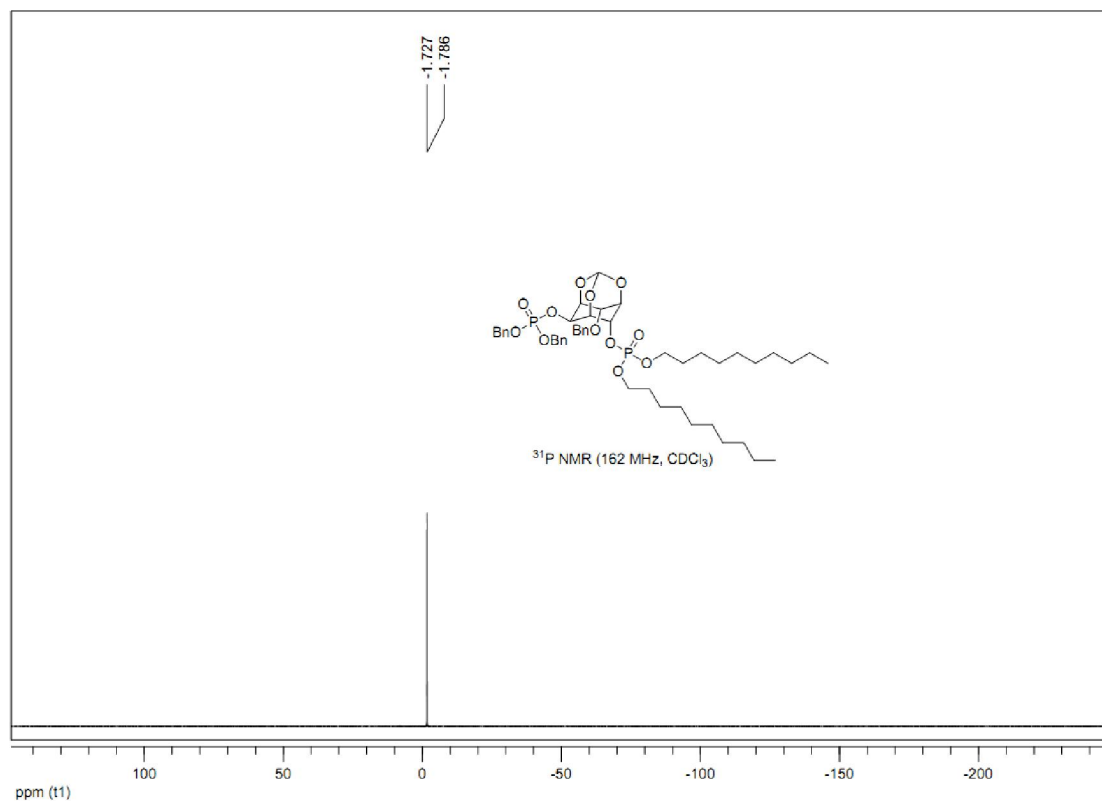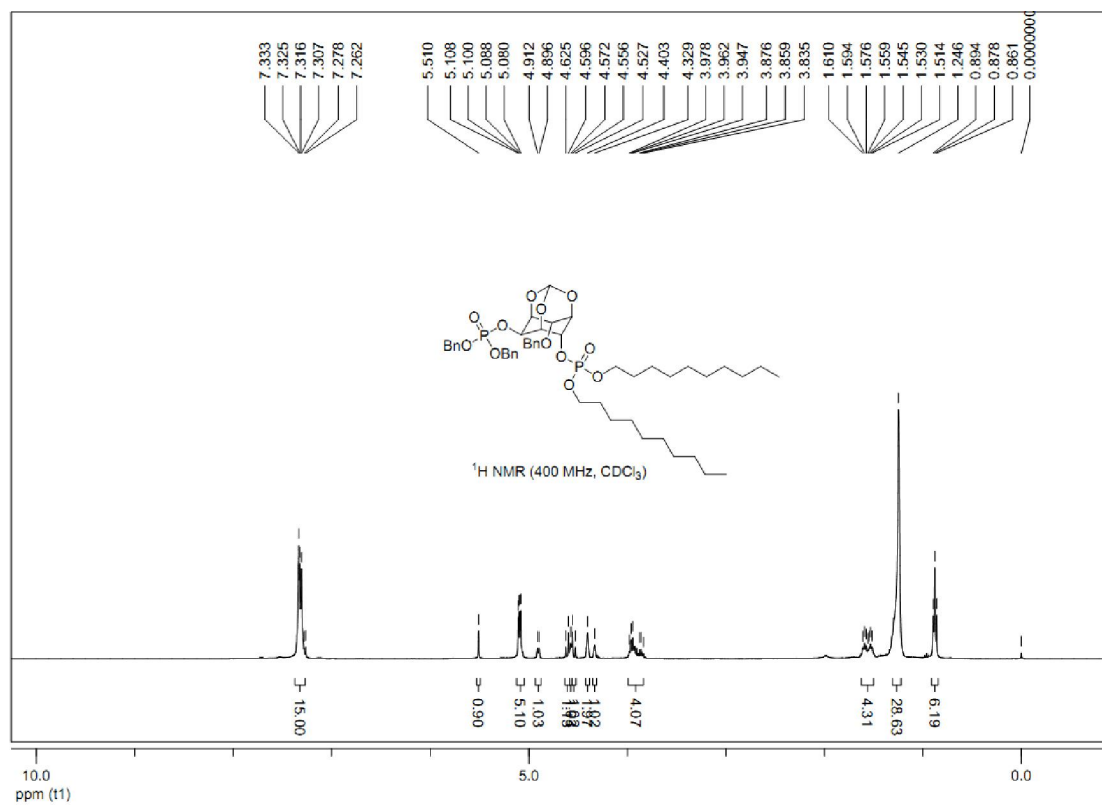

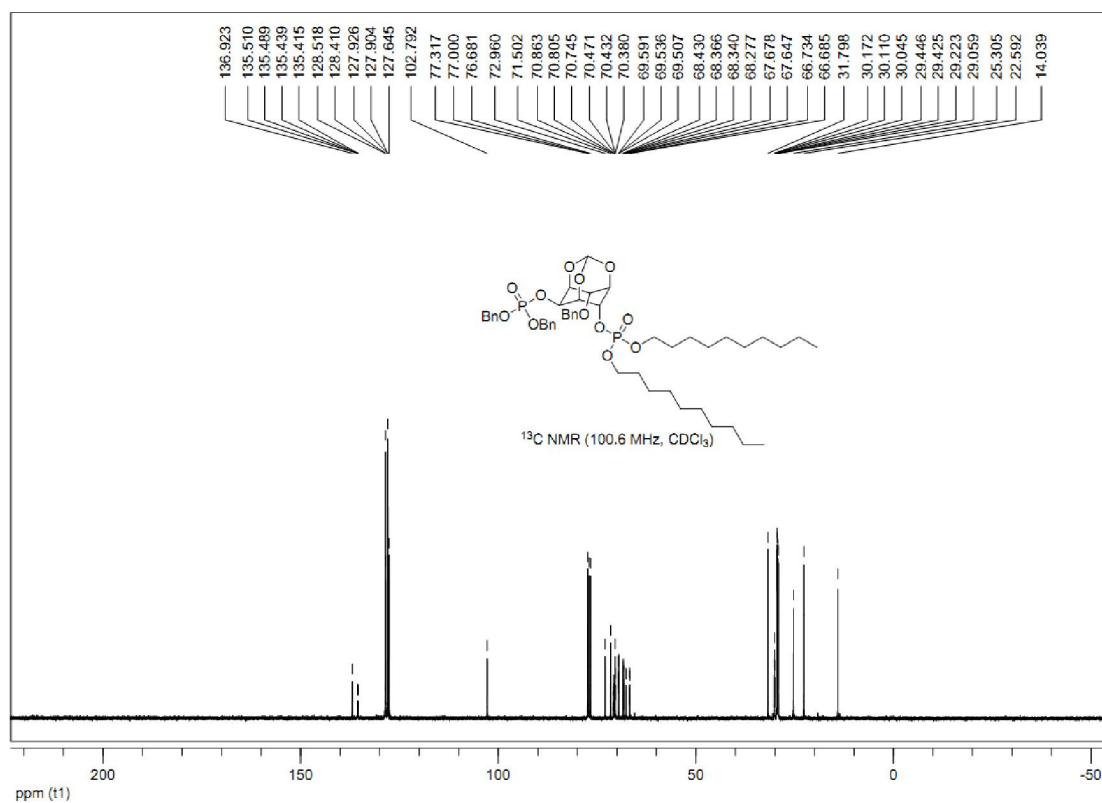

**meso-4,6-di-O-benzyl-D-myo-inositol-1,3,5-tri(dimethyl phosphate)-2-(didecyl phosphate)**  
**(33)**

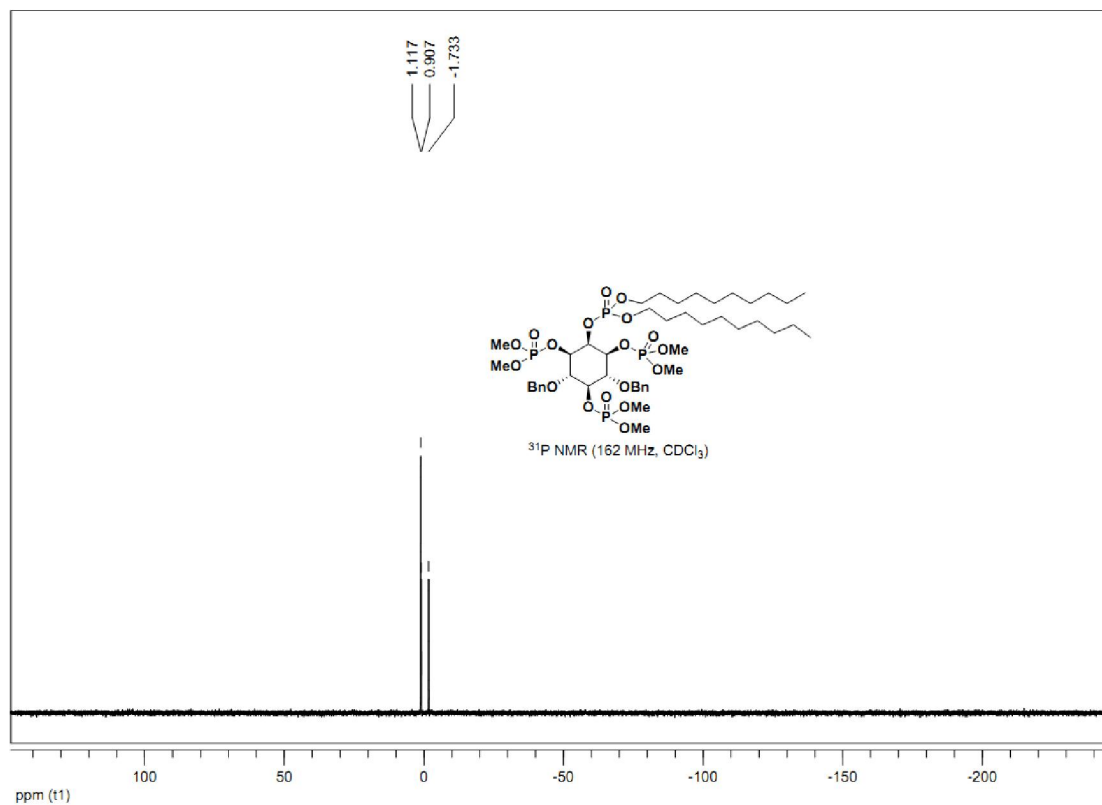

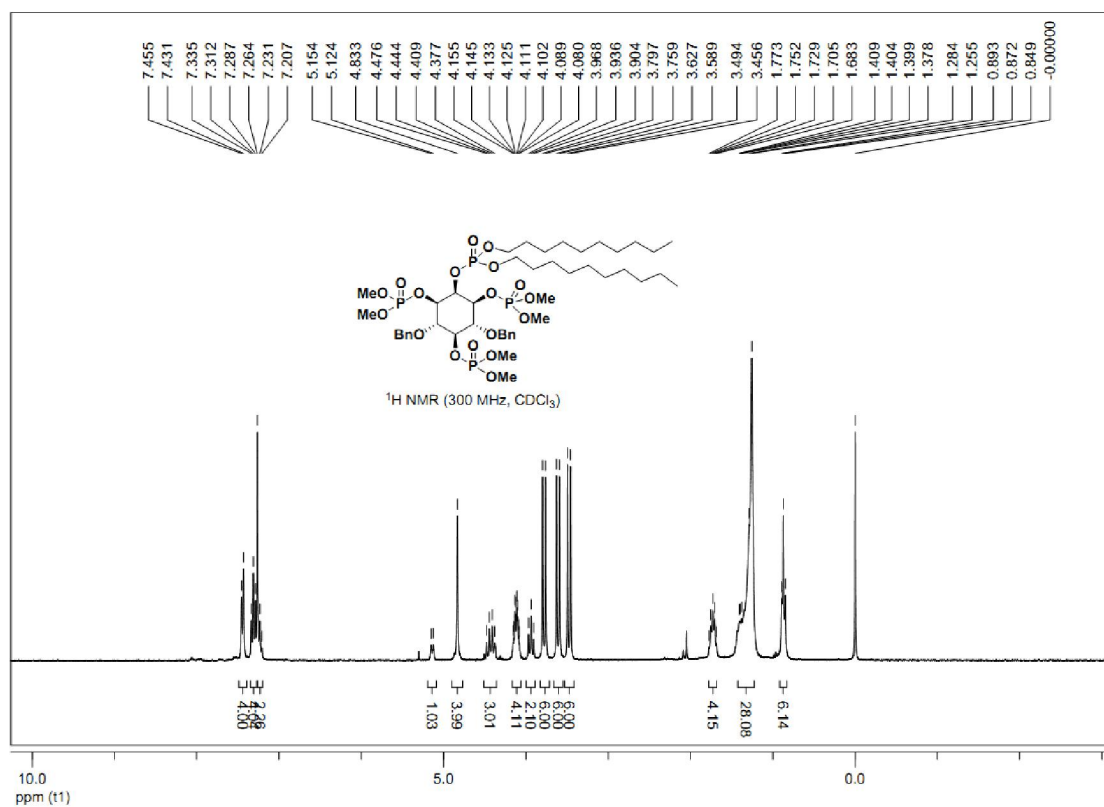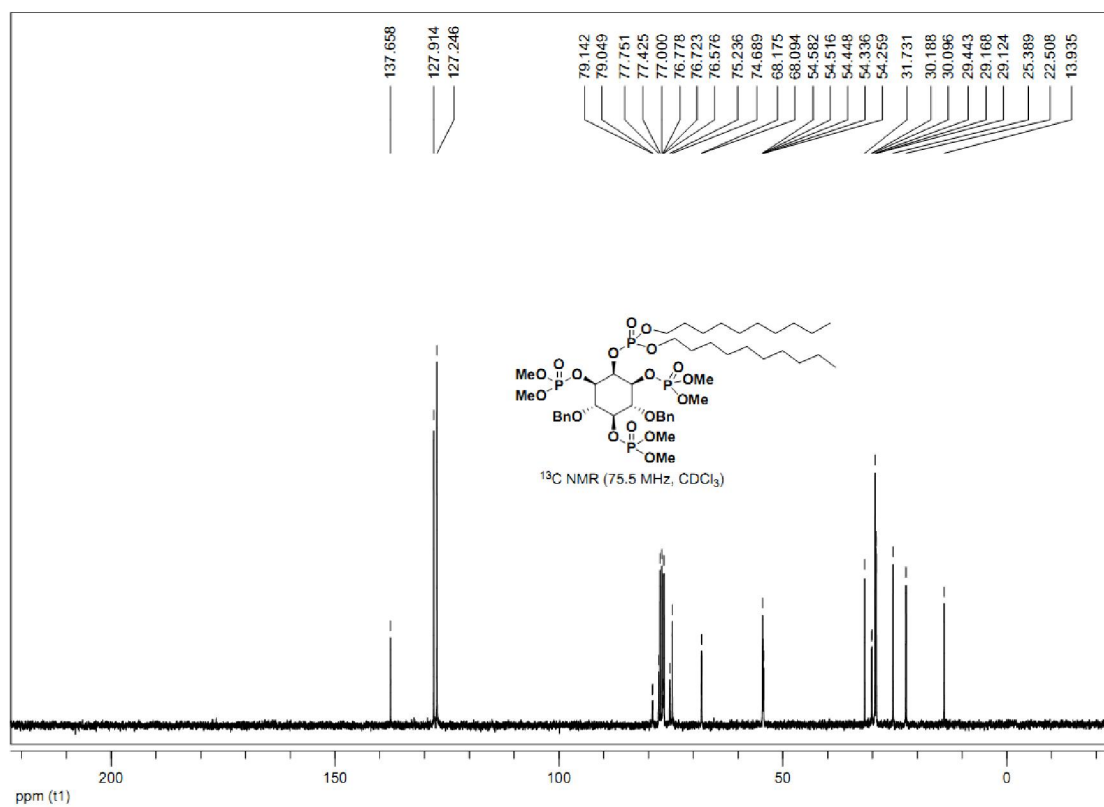



**meso-D-*myo*-inositol-1,3,5-tri(dimethyl phosphate)-2-(didecyl phosphate) (34)**

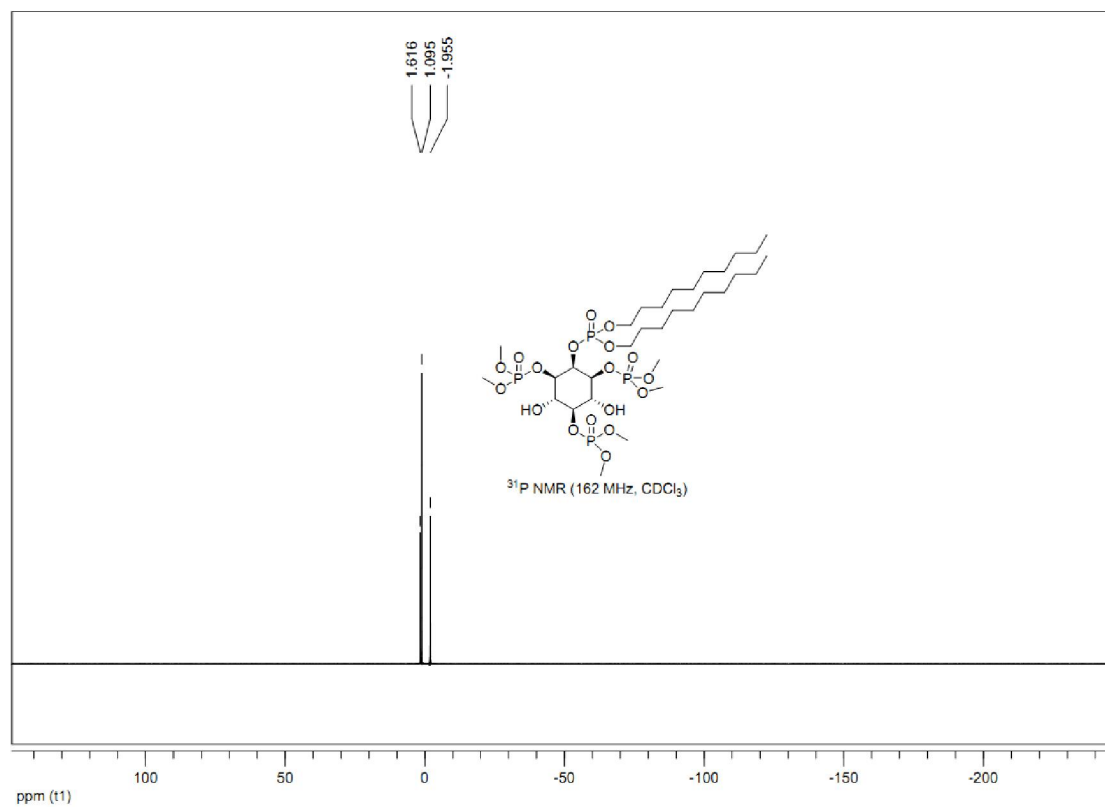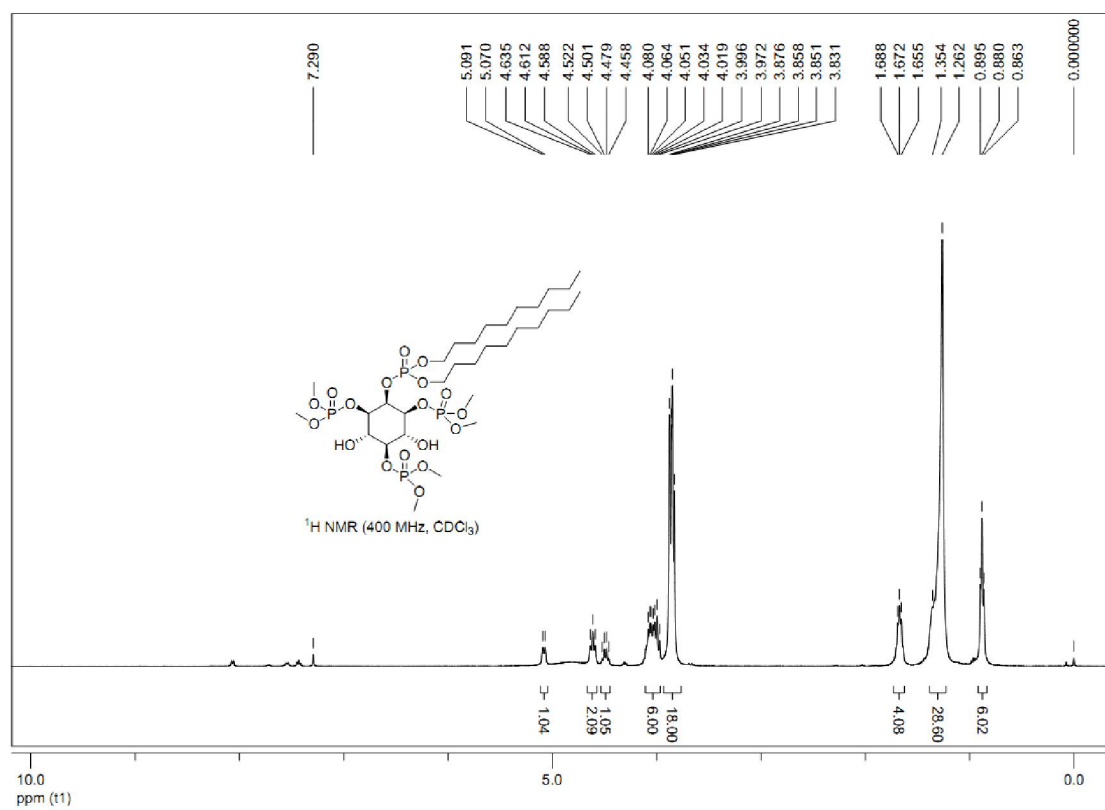

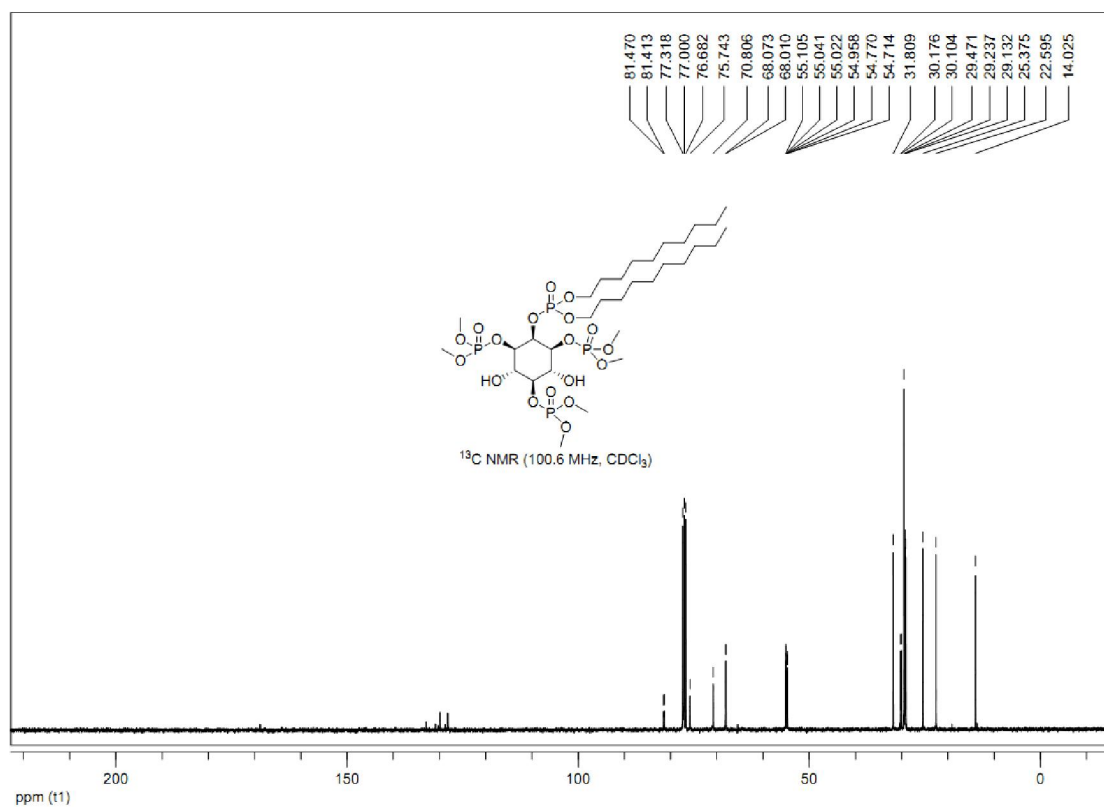

**meso-4,6-di-O-benzyl-D-myo-inositol-1,3,5-tri(dibenzyl phosphate)-2-(didecyl phosphate)**  
**(35)**

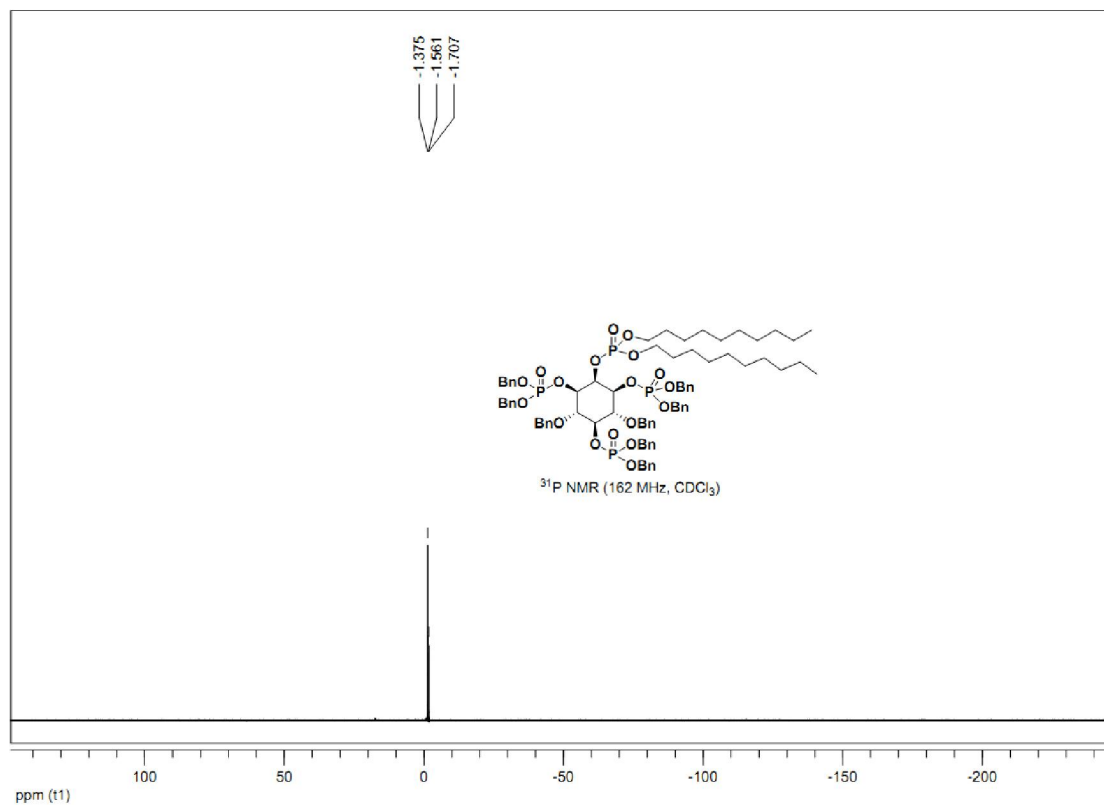

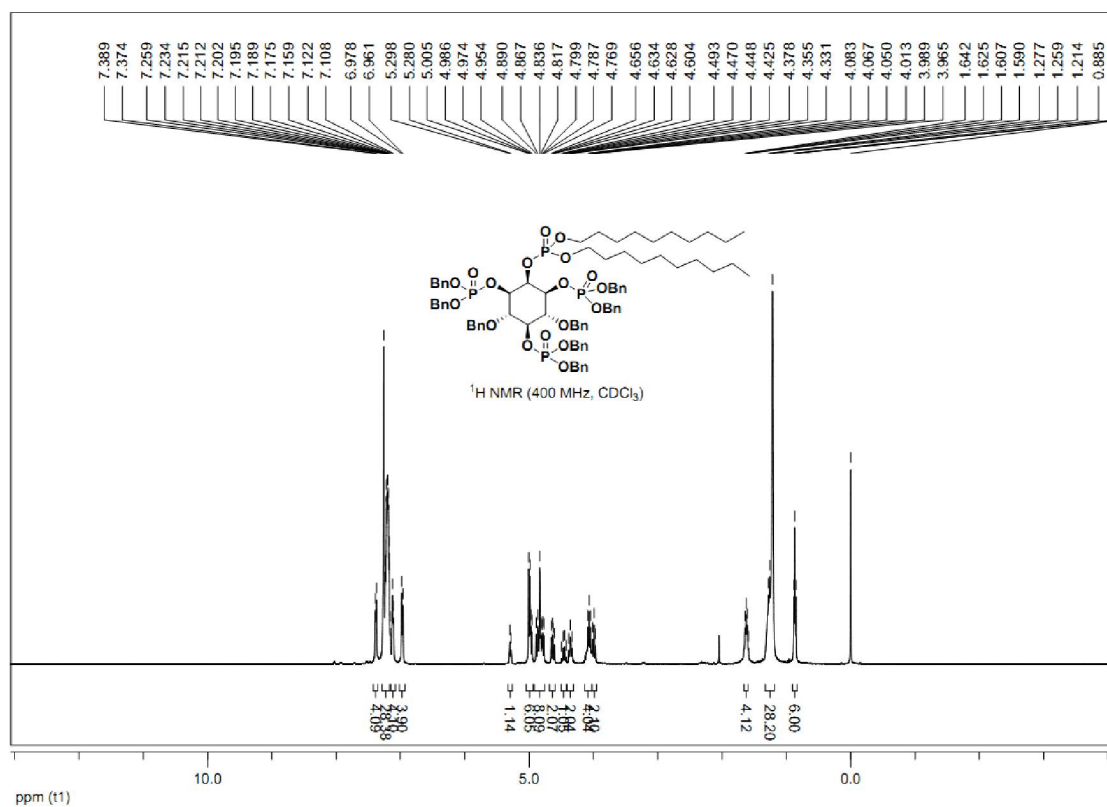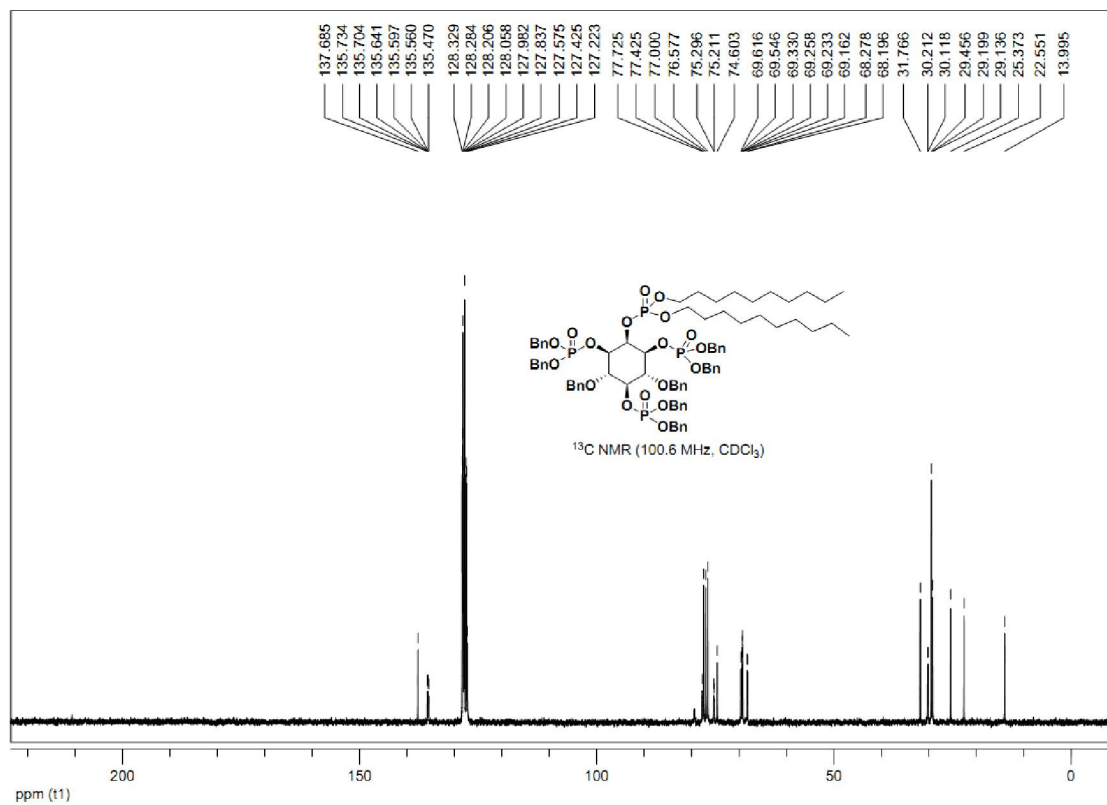

Supplement: c2ob00031h.pdf [file c2ob00031h.pdf]
